# Supplementary material for: The effects of designation and volume of neonatal care on mortality and morbidity outcomes of very preterm infants in England: retrospective population-based cohort study
Source: PubMed Central journal article supplement — BMJ Open. 2014 Jul 2;4(7):e004856. doi: 10.1136/bmjopen-2014-004856 (PMC4091399; doi:10.1136/bmjopen-2014-004856), 2014-07-02
Supplement: bmjopen-2014-004856.draft_revisions.pdf [file bmjopen-2014-004856.draft_revisions.pdf]

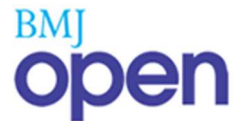

**The effects of designation and volume of neonatal care on mortality and morbidity outcomes of very preterm infants in England: Retrospective population-based cohort study**

|                                 |                                                                                                                                                                                                                                                                                                                                                                                                                                                                                                                                                                        |
|---------------------------------|------------------------------------------------------------------------------------------------------------------------------------------------------------------------------------------------------------------------------------------------------------------------------------------------------------------------------------------------------------------------------------------------------------------------------------------------------------------------------------------------------------------------------------------------------------------------|
| Journal:                        | <i>BMJ Open</i>                                                                                                                                                                                                                                                                                                                                                                                                                                                                                                                                                        |
| Manuscript ID:                  | bmjopen-2014-004856                                                                                                                                                                                                                                                                                                                                                                                                                                                                                                                                                    |
| Article Type:                   | Research                                                                                                                                                                                                                                                                                                                                                                                                                                                                                                                                                               |
| Date Submitted by the Author:   | 14-Jan-2014                                                                                                                                                                                                                                                                                                                                                                                                                                                                                                                                                            |
| Complete List of Authors:       | Watson, Samuel; University of Warwick, Warwick Medical School; University of Warwick, Department of Economics<br>Arulampalam, Wiji; University of Warwick, Department of Economics<br>Petrou, Stavros; University of Warwick, Warwick Medical School<br>Marlow, Neil; UCL, Institute for Women's Health<br>Morgan, Andrei; UCL, Institute for Women's Health<br>Draper, Elizabeth; University of Leicester, Department of Health Sciences<br>Santhakumaran, Shalini; Imperial College, Department of Medicine<br>Modi, Neena; Imperial College, Department of Medicine |
| <b>Primary Subject Heading</b>: | Paediatrics                                                                                                                                                                                                                                                                                                                                                                                                                                                                                                                                                            |
| Secondary Subject Heading:      | Health economics, Health services research                                                                                                                                                                                                                                                                                                                                                                                                                                                                                                                             |
| Keywords:                       | Neonatal intensive care units, High-volume hospitals, Place of birth, Neonatal mortality                                                                                                                                                                                                                                                                                                                                                                                                                                                                               |
|                                 |                                                                                                                                                                                                                                                                                                                                                                                                                                                                                                                                                                        |

SCHOLARONE™  
Manuscripts

only

1  
2  
3 **The effects of designation and volume of neonatal**  
4 **care on mortality and morbidity outcomes of very**  
5 **preterm infants in England: Retrospective**  
6 **population-based cohort study**  
7  
8  
9  
10  
11  
12  
13  
14  
15  
16

17 **Watson, S. I.**, Health Economist, Warwick Medical School, University of Warwick, Coventry

18  
19  
20 **Arulampalam, W.**, Professor of Economics, Department of Economics, University of  
21  
22 Warwick, Coventry  
23

24 **Petrou, S.**, Professor of Health Economics, Warwick Medical School, University of Warwick,  
25  
26 Coventry  
27

28  
29 **Marlow, N.**, Professor of Neonatal Medicine, Academic Neonatology, UCL Institute for  
30  
31 Women's Health, London  
32  
33

34 **Morgan, A.S.**, Senior Clinical Research Associate, Academic Neonatology, UCL Institute for  
35  
36 Women's Health, London  
37  
38

39 **Draper, E.S.**, Professor of Perinatal & Paediatric Epidemiology, Department of Health  
40  
41 Sciences, University of Leicester  
42  
43

44 **Santhakumaran, S.**, Statistician, Section of Neonatal Medicine, Department of Medicine,  
45  
46 Chelsea and Westminster Campus, Imperial College London, London  
47  
48

49 **Modi, N.**, Professor of Neonatal Medicine, Section of Neonatal Medicine, Department of  
50  
51 Medicine, Chelsea and Westminster Campus, Imperial College London, London  
52  
53

54 **On behalf of the Neonatal Data Analysis Unit and the NESCOP Group**  
55  
56  
57  
58  
59  
60

1  
2  
3 *Keywords:* Neonatal intensive care units; high-volume hospitals; place of birth; neonatal  
4  
5 mortality  
6

7  
8 *Word count:* 3,497  
9

10  
11 *Corresponding author:*  
12

13 Samuel I. Watson,  
14  
15 Warwick Medical School,  
16  
17 University of Warwick,  
18  
19 Coventry,  
20  
21 CV4 7AL,  
22  
23 United Kingdom.  
24

25  
26 Tel: +44 (0) 7502 457 817.  
27

28 Email: [s.i.watson@warwick.ac.uk](mailto:s.i.watson@warwick.ac.uk)  
29  
30  
31  
32  
33  
34  
35  
36  
37  
38  
39  
40  
41  
42  
43  
44  
45  
46  
47  
48  
49  
50  
51  
52  
53  
54  
55  
56  
57  
58  
59  
60

## ABSTRACT

**Objective:** To examine the effects of designation and volume of neonatal care at the hospital of birth on mortality and morbidity outcomes in very preterm infants in a managed clinical network setting.

**Design:** A retrospective, population based analysis of operational clinical data using adjusted logistic regression and instrumental variables analyses.

**Setting:** 165 National Health Service neonatal units in England contributing data to the National Neonatal Research Database at the Neonatal Data Analysis Unit and participating in the Neonatal Economic, Staffing, and Clinical Outcomes Project.

**Participants:** 20,554 infants born at <33 weeks completed gestation (17,995 born at 27-32 weeks; 2,559 born at <27 weeks), admitted to neonatal care and either discharged or died, over the period 1<sup>st</sup> January 2009 to 31<sup>st</sup> December 2011.

**Intervention:** Tertiary designation or high volume neonatal care at the hospital of birth.

**Outcomes:** Neonatal mortality, any in-hospital mortality, surgery for necrotising enterocolitis, surgery for retinopathy of prematurity, bronchopulmonary dysplasia and postmenstrual age at discharge.

**Results:** Infants born at <33 weeks gestation and admitted to a high volume neonatal unit at the hospital of birth were at reduced odds of neonatal mortality (IV regression odds ratio [OR]: 0.70, 95% confidence interval [CI]: 0.53-0.92) and any in-hospital mortality (OR: 0.68, 95% CI: 0.54-0.85). The effect of volume on any in-hospital mortality was most acute amongst infants born at <27 weeks gestation (OR: 0.51, 95% CI: 0.33-0.79). A negative association between tertiary-level unit

1  
2  
3 designation and mortality was also observed with adjusted logistic regression for  
4  
5 infant born at <27 weeks gestation.  
6  
7

8 **Conclusions:**High volume neonatal care provided at the hospital of birth may  
9  
10 protect against in-hospital mortality in very preterm infants. Future developments of  
11  
12 neonatal services should promote delivery of very preterm infants at hospitals with  
13  
14 high volume neonatal units.  
15  
16  
17  
18  
19  
20  
21  
22  
23  
24  
25  
26  
27  
28  
29  
30  
31  
32  
33  
34  
35  
36  
37  
38  
39  
40  
41  
42  
43  
44  
45  
46  
47  
48  
49  
50  
51  
52  
53  
54  
55  
56  
57  
58  
59  
60

## ARTICLE SUMMARY

### Strengths and limitations of this study

- A national dataset consisting of the electronic patient records of a large majority of admissions to neonatal specialist care in England
- The analysis takes into account both observed and unobserved confounding
- A weakness is that the analysis is unable to disentangle the effects of the neonatal unit at the place of birth from subsequent transfers to other neonatal units

## INTRODUCTION

Intense debate has revolved around the optimal organisation of neonatal critical care services. Numerous studies have suggested that the intensity and volume of neonatal care at the hospital of birth is negatively correlated with adverse clinical outcomes, including mortality.[1–11] This has contributed to calls for centralisation of neonatal services and the closure of smaller neonatal units.[2,11,12]

Following a review by the Department of Health in 2003, perinatal centres in England were reorganised into managed clinical networks (MCN).[13] MCNs provide some of the benefits of centralisation, but also strive to maintain equity and ease of access to services by keeping lower care level and lower volume neonatal units open, with provision for transfer to higher care level or higher volume units, if required.[13] Particular emphasis is placed on the importance of transferring women at risk of extremely preterm labour to tertiary centres before delivery. Consequently, most networks aim to transfer women at high risk of delivery at <27 weeks of gestation. We have previously shown that, since the formation of MCNs, both the proportion of low gestational age infants born in hospitals with higher designation neonatal units and their transfer rate between hospitals has increased significantly; however, it remains unclear what effect this has had on clinical outcomes.[14]

Studies that have examined the effects of neonatal unit designation or volume of neonatal care provided at the hospital of birth have shown that low designation level or volume is associated with increased rates of mortality,[1–10] decreased infection rate,[7] increased severe periventricular haemorrhage,<sup>11</sup> and increased bronchopulmonary dysplasia.[7] However, these studies were almost exclusively conducted in the United States where there is greater variability in neonatal unit volume—the highest volume units in the US are typically much larger than equivalent units in England—and there is no formal arrangements for MCNs. Results from similar studies using data from the UK are limited and based on data from 1998-9, prior to the formation of MCNs.[15,16] We are not aware of any studies that

1  
2  
3 have examined infant outcomes for neonatal specialist services in MCNs in relation to unit  
4 designation or volume. In addition, organisation of neonatal care differs between countries  
5 potentially affecting the generalisability of results from these systems; for example, in  
6  
7 Germany neonatal services are markedly deregionalized whereas in Finland and Portugal  
8  
9 there is a high degree of regionalization.[17]  
10  
11

12  
13  
14 Our aim in this study was to examine the effects of designation and volume of neonatal care  
15 provided at the hospital of birth on mortality and morbidity outcomes. We assess whether  
16 organisational factors remain determinants of clinical outcomes despite the goals of neonatal  
17 reorganisation that sought to ensure that vulnerable infants are not disadvantaged by their  
18 place of birth.  
19  
20  
21  
22  
23

## 24 25 **METHODS**

### 26 27 **Data source and study population**

28  
29  
30  
31 For the purpose of this empirical investigation, we extracted data from the National Neonatal  
32 Research Database (NNRD) for neonatal units participating the Neonatal Economic,  
33 Staffing, and Clinical Outcomes Project (NESCOP). The NNRD is held by the Neonatal Data  
34 Analysis Unit (NDAU), Imperial College, London, and was created from patient-level  
35 electronic records of all infants admitted to 168 of 173 neonatal units in England. Approval  
36 for data collection was obtained from the national research ethics service (reference REC  
37 10/H0803/151) as well as the Caldicott Guardians of each NHS Trust. NESCOP included  
38  
39 165 centres providing perinatal care. On behalf of NESCOP, the MRC EPICure studies  
40 carried out the Unit Profile Survey (UPS) during 2011, comprising a survey of English  
41 hospitals that provided onsite obstetric and neonatal services. We extracted records from the  
42  
43 NNRD of all infants born in hospital at  $\leq 32^{+6}$  weeks  $^{+days}$  gestation, admitted over the period  
44  
45 1<sup>st</sup> January 2009 to 31<sup>st</sup> December 2011 born at these units and who were discharged or  
46  
47 died over the same period. We excluded infants who only received transitional care.  
48  
49  
50  
51  
52  
53  
54  
55  
56  
57  
58 Gestational age was determined by ultrasound scan.  
59  
60



## Outcomes

We derived the following outcomes from the extracted data for use in the analyses: 28-day (neonatal) mortality, any in-hospital mortality, treatment for necrotising enterocolitis (NEC), treatment for retinopathy of prematurity (ROP), and bronchopulmonary dysplasia (BPD). We defined BPD as the requirement of supplementary oxygen for at least 28 days and at 36 weeks postmenstrual age (PMA).[18] We also examined PMA at discharge as a marker of length of stay; this was defined as the gestational age at birth plus the length of stay at final discharge from any neonatal unit or death. We defined the outcome to be one if the PMA at discharge was greater than 40 weeks and zero otherwise.

## Covariates

To determine appropriate covariates, we reviewed previous prediction models for very preterm infants[19] and selected variables that a) were significant predictors of adverse sequelae, b) were available in our dataset and of high quality, and c) not confounded by the provision of neonatal care. The variables we included were: gestational age at birth, gestational age squared, birth weight z-score (birth weight standardised by gestational age week), and the following indicators: whether the mother received a full or partial course of antenatal steroids, sex, infant year of birth, and whether or not the mother came from an area within the lowest decile of the Index of Multiple Deprivation 2007 score.[20]

## Statistical methods

We conducted two separate sets of analyses based on whether or not infants were admitted to a neonatal unit at the hospital of birth designated as: (i) a tertiary centre,[20] or (ii) high volume. For the latter, we defined volume according to the annual number of care days at any level of care provided to very preterm infants ( $\leq 32^{+6}$  weeks gestation). A 'high volume' unit was defined as one whose volume was in the top quartile of all neonatal units in the sample. 'High volume' was determined by quartile rather than an absolute care day threshold to facilitate comparison with other measures of volume in the sensitivity analyses.

1  
2  
3 A previous study that examined organisational characteristics of neonatal units also  
4 categorised volume using quartiles.[17] Dichotomising by upper quartile divided the infants  
5 between high and low volume units in approximately the same proportion as between tertiary  
6 and non-tertiary level units. To aid comparison with other studies, in particular from the US,  
7 and as a robustness check, 'high volume' was also defined as 100 very low birth-weight  
8 (VLBW; <1,500g) admissions of infants born in the same hospital per annum.  
9  
10

11  
12  
13  
14  
15  
16 We first conducted an unadjusted comparison of clinical characteristics and outcomes of  
17 infants by unit characteristics. Secondly, we estimated an adjusted model, and thirdly, we  
18 conducted an adjusted comparison using an instrumental variables methodology to account  
19 for unobserved confounding. In the absence of a randomised control trial, instrumental  
20 variables methodology acts as an *ex post* randomisation and enables us to estimate the  
21 'causal effects' of designation and volume of neonatal care provided at the hospital of birth.  
22  
23  
24  
25  
26  
27  
28  
29  
30  
31  
32  
33  
34  
35  
36  
37  
38  
39  
40  
41  
42  
43  
44  
45  
46  
47  
48  
49  
50  
51  
52  
53  
54  
55  
56  
57  
58  
59  
60

The methodology involves the use of a variable, called an "instrument", which, in this context, needs to fulfil two criteria: 1) it should be strongly correlated with the characteristics of the neonatal unit at the hospital of birth; and 2) it should be uncorrelated with the outcomes of interest conditional on observed covariates and therefore uncorrelated with unobserved confounders.

For the instruments, we used indicators for the designated level of care of the nearest neonatal unit to the mother's residence, an indicator for whether it had surgical facilities, an indicator for whether it was high volume, the distance to the nearest neonatal unit, and the interactions of either the level of care indicators or high volume indicator with distance, giving nine instruments in total. Straight line distance was calculated from the population weighted centre of the mother's Lower Super Output Area to each hospital.[22]

These instrumental variables fulfil condition (1) if infants are more likely to be born in the hospital closest to the mother's residence. They will also fulfil condition (2) if the location of the mother's residence is uncorrelated with an infant's unobserved clinical risk. We tested for

1  
2  
3 a difference in observed characteristics by level and volume of the nearest neonatal unit.  
4  
5 However, tertiary level and high volume units are more likely to be in urban areas that are  
6  
7 socioeconomically deprived so we may expect to see more preterm and low birth weight  
8  
9 infants being born in these areas.[23] We therefore also controlled for local deprivation when  
10  
11 testing for a difference in means by nearest neonatal unit characteristics by estimating a  
12  
13 linear regression of the observed variable of interest on the nearest neonatal unit  
14  
15 characteristic and deprivation indicator and using an F-test to test the coefficient on the  
16  
17 nearest neonatal unit characteristic variable.  
18  
19

20 As the outcomes are all binary logistic regression was used. In order to employ instrumental  
21  
22 variables estimation in this framework, two stage residual inclusion (2SRI) was used.[24]  
23  
24 The 2SRI method is explained in online Appendix A. The standard errors were adjusted for  
25  
26 clustering within units.  
27  
28

29 Our baseline analyses examined infants born at  $\leq 32^{+6}$  weeks gestation. We then conducted  
30  
31 analyses on subsets of infants born at  $\leq 26^{+6}$  weeks gestation or at  $27^{+0}$ - $32^{+6}$  weeks  
32  
33 gestation;  $\leq 26^{+6}$  weeks gestation is the cut-off used by perinatal networks for prioritising  
34  
35 inter-unit transfers. 'Statistical significance', where discussed, refers to a 5% significance  
36  
37 level in all cases.  
38  
39

#### 40 **Missing data and sensitivity analyses**

41  
42 Infants with missing outcomes data were excluded from the analyses, whilst those with  
43  
44 missing covariate data were assigned a zero in the case of binary indicators. There were no  
45  
46 infants with missing continuous covariates. We excluded all infants with any missing data as  
47  
48 a further sensitivity analysis.  
49  
50

51  
52 Separate sensitivity analyses, using our preferred method of instrumental variables logistic  
53  
54 regression, also explored the effects of: (i) including unit random effects in the statistical  
55  
56 models; (ii) removing infants who died from analyses of the morbidity and PMA at discharge  
57  
58 outcomes and defining a new outcome of any in-hospital mortality and/or BPD; (iii) redefining  
59  
60

1  
2  
3 high volume as the top 25% of units in terms of intensive care days provided to  $\leq 32^{+6}$   
4 gestational week infants; (iv) redefining high volume as the top 25% of units in terms of  
5 number of  $\leq 32^{+6}$  gestational week infants cared for; and (v) redefining high volume as at  
6  
7  
8  
9 least 100 VLBW infants born in and admitted to the neonatal unit in the hospital per annum.

10  
11  
12 All analyses were carried out with R 2.14.2 and Stata 11.

## 13 14 15 **RESULTS**

16  
17  
18 In total, data for 20,554 infants born at  $\leq 32^{+6}$  weeks gestation over the study period and  
19 admitted to a neonatal unit at the hospital of birth were extracted from the NNRD, 2,559 of  
20 whom were born at  $\leq 26^{+6}$  weeks gestation. Table 1 provides descriptive statistics of the  
21 samples analysed.  
22  
23  
24

25  
26  
27 In the sample, 9,466 (46.1%) infants were born in hospitals with a tertiary level neonatal unit  
28 and 9,541 (46.4%) were born in hospitals with a high volume neonatal unit. The cut-off for  
29 high volume was approximately 3,480 annual care days for infants born at  $\leq 32^{+6}$  weeks  
30 gestation in each hospital. The total sample of 20,554 infants were born in 165 different  
31 hospitals, 44 (26.7%) of which had level three neonatal units, 81 (49.0%) level two neonatal  
32 units, and 39 (23.6%) level one neonatal units. There were 39 (23.6%) neonatal units  
33 classified as high volume, 30 (78.0%) of which were designated level three units;  
34 consequently, 14 of the 44 (31.8%) level three designated units were not classified as high  
35 volume. Among the 20,554 infants, 1,892 (9.2%) were born in hospitals with neonatal units  
36 that were classified as high volume but not tertiary level and 1,817 (8.8%) were born in  
37 hospitals with neonatal units classified as tertiary level but not high volume.  
38  
39  
40  
41  
42  
43  
44  
45  
46  
47  
48

### 49 50 **'Standard' adjusted results**

51  
52  
53 Table 2 presents the estimated adjusted odds ratios associated with admission to either  
54 tertiary or high volume neonatal care the hospital of birth.  
55  
56  
57  
58  
59  
60

1  
2  
3 The standard logistic regressions did not reveal a statistically significant difference in the  
4 odds of mortality for very preterm infants admitted to tertiary level care at the hospital of birth  
5 compared to their counterparts admitted to non-tertiary level care. However, when  
6  
7 considering only infants born at  $\leq 26^{+6}$  weeks gestation, we found a reduction in the odds of  
8 neonatal mortality (OR: 0.65, 95% CI: 0.46-0.91,  $p=0.012$ ), but not any in-hospital mortality.  
9  
10

11  
12  
13 A reduced odds of neonatal mortality was observed for infants born at  $\leq 32^{+6}$  weeks gestation  
14 (OR: 0.73, 95% CI: 0.56-0.95,  $p=0.018$ ) or at  $\leq 26^{+6}$  weeks gestation (OR: 0.62, 95% CI:  
15 0.44-0.87,  $p=0.006$ ) and admitted to a high volume neonatal unit at the hospital of birth, but  
16 this was not replicated for infants born at  $27^{+0}$ - $32^{+6}$  weeks gestation. Infants born at  $\leq 26^{+6}$   
17 weeks gestation were also at reduced odds of any in-hospital mortality (0.71, 95% CI: 0.52-  
18 0.97,  $p=0.033$ ) and increased odds of BPD (OR: 1.59, 95% CI: 1.18-2.14,  $p=0.002$ ). There  
19 were no other statistically significant differences observed for the morbidity outcomes.  
20  
21  
22  
23  
24  
25  
26  
27

### 28 **Instrument validity**

29  
30  
31 The instruments were strongly correlated with the characteristics of the unit at the hospital of  
32 birth; 88.4% of infants whose nearest neonatal unit was designated level three were born in  
33 a hospital with a level three unit compared to only 22.5% of infants whose nearest neonatal  
34 unit was not designated level three. Table 3 shows descriptive statistics for the 20,554 very  
35 preterm infants by the designation and volume of the neonatal unit nearest to the mother's  
36 place of residence. After correcting for deprivation, there were no statistically significant  
37 differences in the observed covariates.  
38  
39  
40  
41  
42  
43  
44  
45  
46

### 47 **Instrumental variables logistic regression**

48  
49 Table 4 shows the estimated odds ratios using the instrumental variables logistic  
50 regressions. We found no significant differences in neonatal mortality between infants  
51 admitted to either tertiary or non-tertiary neonatal care at the hospital of birth. We did find an  
52 increased odds of treatment for ROP for very preterm infants born at  $27^{+0}$ - $32^{+6}$  weeks  
53 gestation born in a hospital with a tertiary level unit (OR: 2.17, 95% CI: 1.06-4.47,  $p=0.035$ ).  
54  
55  
56  
57  
58  
59  
60

1  
2  
3 In contrast to the effect of tertiary level care, admission to a high volume neonatal unit at the  
4 hospital of birth significantly reduced the odds of neonatal mortality (OR: 0.70, 95% CI: 0.53-  
5 0.92,  $p=0.011$ ) and any in-hospital mortality (OR: 0.68, 95% CI: 0.54-0.85,  $p=0.001$ ) in very  
6 preterm infants. These effects were most acute amongst infants born at  $\leq 26^{+6}$  weeks  
7 gestation. In terms of morbidity, the only significant effect was found for BPD (OR: 1.78, 95%  
8 CI: 1.12-2.81,  $p=0.014$ ) for infants born at  $\leq 26^{+6}$  weeks gestation and admitted to high  
9 volume neonatal care at the hospital of birth.  
10  
11  
12  
13  
14  
15

### 16 **Sensitivity Analyses**

17  
18  
19 The results from the sensitivity analyses are presented in Appendix B. There were 1,172  
20 (5.7%) infants with missing data for antenatal steroids; there were no missing values for the  
21 other covariates. The results remained qualitatively similar when all infants with any missing  
22 data were excluded from the analyses (table B1).  
23  
24  
25  
26  
27

28  
29 The results remained robust to the inclusion of unit level random effects. We further  
30 excluded infants who died from the analyses of morbidity outcomes. This did not reveal any  
31 evidence of differences in the odds ratios except for the odds of treatment for ROP for  
32 infants admitted to tertiary level care at the hospital of birth (OR: 1.96, 95% CI: 1.15-3.32,  
33  $p=0.013$ ) (table B2). No evidence of an effect for the outcome defined as any in-hospital  
34 mortality and/or BPD was observed (table B2). Three alternative measures of volume were  
35 also used. In these sensitivity analyses, the odds of any in-hospital mortality remained  
36 significantly lower for very preterm infants admitted to a high volume unit at the hospital of  
37 birth (table B3 and B4). Only eight hospitals (4.8%) met the criteria of at least 100 VLBW  
38 infants per annum in any of the study years so that only a small proportion (6.5%) of the  
39 sample were inborn and admitted to these units. There is therefore imprecision around these  
40 results with wide confidence intervals; amongst these infants, the odds of any in-hospital  
41 mortality was significantly lower but not statistically significant (table B4).  
42  
43  
44  
45  
46  
47  
48  
49  
50  
51  
52  
53  
54

## 55 **DISCUSSION**

1  
2  
3 We examined the effects of designation and volume of neonatal care provided at the hospital  
4 of birth on mortality and morbidity outcomes for very preterm infants in England. Our key  
5 finding was a consistent reduction in the odds of mortality for very preterm infants admitted  
6 to high volume neonatal units. We examined infants born at  $\leq 26^{+6}$  weeks gestation and  
7 those born at  $27^{+6}$ - $32^{+6}$  weeks gestation separately to reflect transfer policy and found a  
8 statistically significant reduction in the odds of mortality in the former group only.

9  
10 Furthermore, we found differences in the odds of mortality outcomes between standard  
11 logistic regressions and our preferred instrumental variables approach. The standard logistic  
12 regressions were generally found to under-estimate the beneficial effects of high volume  
13 care on mortality outcomes. This was expected given the aim of MCNs to transfer high risk  
14 infants to high volume and designation units. With regards to morbidity outcomes, treatment  
15 for ROP was the only morbidity for which a statistically significant effect was observed  
16 across analyses. We found that infants born at  $27^{+6}$ - $32^{+6}$  weeks gestation in hospitals with  
17 tertiary level units were at increased odds of receiving treatment for ROP; however, only a  
18 very small number of these infants received treatment for ROP (86/17,995; 0.5%),  
19 suggesting the observed difference may not be clinically significant.

20  
21 Our preferred instrumental variables methodology, in the absence of a randomised  
22 assignment of infants to units, enabled us to estimate the causal effects of designation and  
23 volume of neonatal care provided at the hospital of birth using observational data. This  
24 approach has been widely applied in other healthcare evaluations.[25] However, we can only  
25 identify one previous application of this methodology to the evaluation of perinatal  
26 outcomes.[7] Our findings agree with the findings of an US-based study that examined the  
27 separate effects of level and volume of neonatal care.[4] We also found a reduction in the  
28 odds of mortality when analysing the annual number of VLBW admissions of inborn infants—  
29 a measure frequently used in US studies of this nature.[2]

30  
31 We acknowledge limitations to our study. First, instrumental variables methodology only  
32 identifies the effect of an intervention or treatment for those individuals whose assignment to  
33  
34  
35  
36  
37  
38  
39  
40  
41  
42  
43  
44  
45  
46  
47  
48  
49  
50  
51  
52  
53  
54  
55  
56  
57  
58  
59  
60

1  
2  
3 treatment is altered by the instrumental variable.[26] We do not know the effects for infants  
4 who would always be born in hospitals with a high level or volume neonatal unit despite the  
5 location of the mother's residence (see online Appendix A). Nevertheless, we demonstrated  
6 the validity of our instruments in meeting the required assumptions. Importantly, the  
7 assumptions required for an instrumental variables methodology are weaker than those  
8 required to support a "standard" analysis, which requires that infants are randomly assigned  
9 to hospitals of birth; otherwise the estimated odds ratios will be biased. Second, due to data  
10 limitations we cannot control for the effects of care and risk of death in the delivery suite at  
11 the hospital of birth. However, high volume delivery units have been shown to be associated  
12 with a reduced risk of neonatal mortality.[27,28] Since high volume delivery units are often  
13 found in hospitals with high volume neonatal care this would lead us to suspect that our  
14 analyses underestimate the benefits of birth in hospitals with high volume neonatal care.  
15  
16  
17  
18  
19  
20  
21  
22  
23  
24  
25  
26  
27

28 Third, we are unable to disentangle the effects of the unit at the place of birth and  
29 subsequent transfers on final outcomes. We therefore cannot assess whether increasing the  
30 provision of transfers attenuates the increased odds of mortality associated with birth in  
31 hospitals without high volume neonatal care. While identification of acute neonatal transfers  
32 was possible from our data, identifying the effects of transfer on outcomes presents a  
33 number of difficult statistical issues. However, we expect that, if transfers reduce the odds of  
34 mortality, our effects presented in this paper underestimate the benefit of birth in a hospital  
35 with high level or volume neonatal care (see Appendix A for an extended discussion). A final  
36 limitation is that a small number of neonatal units in England (n=8) across MCNs do not  
37 contribute data to the NNRD and/or participate in NESOP. The effect of also including data  
38 from these units on outcomes remains a topic for future enquiry.  
39  
40  
41  
42  
43  
44  
45  
46  
47  
48  
49  
50

51  
52 An intervention that increases the proportion of very preterm infants born in hospitals with  
53 high volume neonatal units may involve increasing the proportion of in-utero transfers.  
54

55 Transfers of women prior to delivery are generally preferable because they are believed to  
56  
57  
58  
59  
60



1  
2  
3 be both safer and less expensive than postnatal transfers of vulnerable infants.[29] However,  
4 a study in 2009 showed that almost one half of all in-utero transfer requests to the London  
5 Ambulance Service were unsuccessful for non-clinical reasons.[30] The effects of transfers  
6 within different organisational structures for neonatal care remains an important area for  
7 future research especially as the new Operational Delivery Networks will supersede the  
8 perinatal MCNs as part of the changes following the Health and Social Care Act (2012).[31]  
9  
10  
11  
12  
13  
14

15  
16 In conclusion, instrumental variables methodology did not reveal evidence of a difference in  
17 mortality outcomes between very preterm infants admitted to either tertiary or non-tertiary  
18 neonatal care at the hospital of birth. However, we do provide evidence of reduced odds of  
19 mortality for very preterm infants admitted to high volume neonatal units at delivery  
20 hospitals. The effect of volume on neonatal outcomes is an important consideration for policy  
21 makers deciding the optimal organisation of neonatal specialist services.  
22  
23  
24  
25  
26  
27  
28  
29  
30  
31  
32  
33  
34  
35  
36  
37  
38  
39  
40  
41  
42  
43  
44  
45  
46  
47  
48  
49  
50  
51  
52  
53  
54  
55  
56  
57  
58  
59  
60

## Acknowledgements

We thank Nicola Fitz-Simon for invaluable advice on statistical issues and Eugene Statnikov and Daniel Gray for assistance with the data. We thank the staff from neonatal units involved in capturing electronic data and Richard Colquhoun, Neonatal Data Analysis Unit manager, and Surbhi Shah for administrative support. We would also like to thank Andy Cole, Kate Bennett, Helen Kirrane, and the Steering Board of the Neonatal Data Analysis Unit.

We would also like to thank the following contributing neonatal units and clinical leads (all units were included in the NESOP survey and offered an "opt out" of service evaluation that made use of NNRD data):

Matthew Babirecki, Airedale General Hospital; Andrew Gallagher, Alexandra Hospital; D Manning, Arrowe Park Hospital; Tim Wickham, Barnet Hospital; MA Saeed, Barnsley District General Hospital; Nawfal Sharief, Basildon Hospital; Ruth Wigfield, Basingstoke & North Hampshire Hospital; Nigel Brooke, Bassetlaw District General Hospital; Raghavan Kadalraja, Bedford Hospital; Julie Nycyk, Birmingham City Hospital; Mike Watkinson, Birmingham Heartlands Hospital; Imogen Morgan, Birmingham Women's Hospital; Sam Oddie, Bradford Royal Infirmary; R.N Mahesh Babu, Broomfield Hospital; Eleri Crosbie, Calderdale Royal Hospital; Tim Wickham, Chase Farm Hospital; Gary Hartnoll, Chelsea & Westminster Hospital; Aiwyne Foo, Chesterfield Royal Hospital; Sarah Dalton, Colchester General Hospital; Graham Whincup, Conquest Hospital; Stephen Brearey, Countess of Chester Hospital; John Chang, Croydon University Hospital (Mayday); Mahfud Ben-Hamida, Cumberland Infirmary; Abdul Hasib, Darent Valley Hospital; S Subramania Krish Namoorthy, Darlington Memorial Hospital; Julian Larson, Derriford Hospital; Kallinath Shyamannr, Dewsbury & District Hospital; Pauline Adiotomre, Diana Princess of Wales Hospital; Nigel Brooke, Doncaster Royal Infirmary; Phil Wylie, Dorset County Hospital; Vivien Chan, Ealing Hospital; K Aboul Khader, East Surrey Hospital; Graham Whincup, Eastbourne District General Hospital; Ruth Shephard, Epsom General Hospital; Sri Nagesh

1  
2  
3 Panasa, Fairfield general; JP Wyllie, Friarage Hospital; Abdus Mallik, Frimley Park Hospital;  
4  
5 Owen Galt, Furness General Hospital; R C de Boer, George Eliot Hospital; Jennifer  
6  
7 Holman, Gloucestershire Royal Hospital; Mike Watkinson, Good Hope Hospital; Stanley  
8  
9 Zengeya, Great Western Hospital; Morag Campbell, Guy's & St Thomas' Hospital; D Gillies,  
10  
11 Harrogate District Hospital; Andrew Butterfill, Hereford County Hospital; Michele Cruwys,  
12  
13 Hillingdon Hospital; Hilary Dixon, Hinchingsbrooke Hospital; Kate Costeloe, Homerton  
14  
15 Hospital; Eleri Adams, Horton Hospital; Chris Wood, Hull Royal Infirmary; Matthew James,  
16  
17 Ipswich Hospital; JP Wyllie, James Cook University Hospital; Vasantha Jayalal, James  
18  
19 Paget Hospital; Eleri Adams, John Radcliffe Hospital; Pratibha Rao, Kettering General  
20  
21 Hospital; B K Sharma, King George Hospital; Abhi Gkeenga, King's College Hospital; Vibert  
22  
23 Noble, King's Mill Hospital; Dwight Lindo, Kingston Hospital; Meera Lama, Lancashire  
24  
25 Women and Newborn Centre; Lawrence Miall, Leeds Neonatal Service; Andrew Currie,  
26  
27 Leicester General Hospital; Andrew Currie, Leicester Royal Infirmary; A Thirumurugan, L  
28  
29 eighton Hospital; Sudhakar Rao, Lincoln County Hospital; Andy Raffles, Lister Hospital; CW  
30  
31 Yoxall, Liverpool Women's Hospital; P Sivakumar, Luton & Dunstable Hospital; Ignatios  
32  
33 Losa, Macclesfield District General Hospital; Hamudi Kijat, Maidstone; B Jan Muhamad,  
34  
35 Manor Hospital; Aung Soe, Medway Maritime Hospital; Jasper Katumba, Milton Keynes  
36  
37 Foundation Trust Hospital; Babu Kumararatne, New Cross Hospital; Vimala Gopinathan,  
38  
39 Newham General Hospital; Mark Dyke, Norfolk & Norwich University Hospital; Yonas  
40  
41 Cherinet, North Devon District Hospital; Sri Nagesh Panasa, North Manchester General  
42  
43 Hospital; Lesley Alsford, North Middlesex University Hospital; Fiona Thompson,  
44  
45 Northampton General Hospital; Paul Mannx, Northwick Park Hospital; Stephen Wardle,  
46  
47 Nottingham City Hospital; Stephen Wardle, Nottingham University Hospital; Tim McBride,  
48  
49 Ormskirk District General Hospital; Seif Babiker, Peterborough City Hospital; Sudhakar Rao,  
50  
51 Pilgrim Hospital; Minesh Khashu, Poole Hospital NHS Foundation Trust; Than Soe, Princess  
52  
53 Alexandra Hospital; Mike Hall, Princess Anne Hospital; Philip Amess, Princess Royal  
54  
55 Hospital; Shaun Walter, Princess Royal University Hospital; Andy Raffles, Queen Elizabeth II  
56  
57 Hospital; CR Groves, Queen Alexandra Hospital; Lidia Tyszczyk, Queen Charlotte's  
58  
59  
60

1  
2  
3 Hospital; Susan Rubin, Queen Elizabeth Hospital; Shaun Walter, Queen Elizabeth Hospital;  
4  
5 Dennis Bosman, Queen Elizabeth Hospital (Gateshead); David Long, Queen Elizabeth the  
6  
7 Queen Mother Hospital; Azhar Manzoor, Queen's Hospital; B K Sharma, Queen's Hospital;  
8  
9 Amanda Ogilvy-Stuart, Rosie Maternity Hospital; Christine Harrison, Rotherham District  
10  
11 General Hospital; Vibha Sharma, Royal Albert Edward Infirmary; GJ Boson, Royal Berkshire  
12  
13 Hospital; M Yadan, Royal Bolton Hospital; Paul Munyard, Royal Cornwall Hospital; John  
14  
15 McIntyre, Royal Derby Hospital; Vaughan Lewis, Royal Devon & Exeter Hospital; D  
16  
17 Schapira, Royal Hampshire County Hospital; Owen Galt, Royal Lancaster Infirmary;  
18  
19 Natasha Maddock, Royal Oldham Hospital; Richa Gupta, Royal Preston Hospital; Alison  
20  
21 Moore, Royal Shrewsbury Hospital; Charles Godden, Royal Surrey County Hospital; Philip  
22  
23 Amess, Royal Sussex County Hospital; Steve Jones, Royal United Hospital; Alan Fenton,  
24  
25 Royal Victoria Infirmary; Anande Mohite, Russells Hall Hospital; Jonathan Moise, Salford  
26  
27 Royal; Shirley Kinsey, Salisbury District Hospital; Mazen Qunibi, Scarborough General  
28  
29 Hospital; Pauline Adiotomre, Scunthorpe General Hospital; Rob Bolton, South Tyneside  
30  
31 District Hospital; Arfa Khan, Southend Hospital; Richard Wach, Southmead Hospital; Sandra  
32  
33 Calvert, St George's Hospital; Ruth Shephard, St Helier Hospital; Anthony Emmerson, St  
34  
35 Mary's Hospital; Peter Chow, St Mary's Hospital; Sian Butterworth, St Mary's Hospital;  
36  
37 James Tooley, St Michael's Hospital; Peter Reynolds, St Peter's Hospital; Avril Garg, St  
38  
39 Richard's Hospital; KK Tewary, Staffordshire General Hospital; Carrie Heal, Stepping Hill  
40  
41 Hospital; Gail Whitehead, Stoke Mandeville Hospital; Majd Abu-Hard, Sunderland Royal  
42  
43 Hospital; Jacqueline Birch, Tameside General Hospital; Rebecca Mann, Taunton &  
44  
45 Somerset Hospital; Elizabeth Pilling, The Jessop Wing; Vivienne van Someren, The Royal  
46  
47 Free Hospital; Rainer Ebel, The Royal London Hospital; Stefan Schulee, Torbay Hospital;  
48  
49 Hamudi Kisat, Tunbridge Wells Hospital; Mark Sellwood, University College Hospital; Kate  
50  
51 Blake, University Hospital Coventry; Jauro Kuna, University Hospital Lewisham; S  
52  
53 Subramania Krish Namoorthy, University Hospital of North Durham; Kate Palmer, University  
54  
55 Hospital of North Staffordshire; Ian Verber, University Hospital of North Tees; Faisal Al-  
56  
57 Zidgali, University Hospital of South Manchester; AJ Rowlands, Victoria Hospital; Joan  
58  
59  
60

1  
2  
3 Oliver, Wansbeck General Hospital; Delyth Webb, Warrington Hospital; R B Acharya,  
4 Warwick Hospital; Chaniyil A Ramesh, Watford General Hospital; Mahfud Ben-Hamida, West  
5 Cumberland Hospital; Hashir Ariff, West Middlesex University Hospital; Ian Evans, West  
6 Suffolk Hospital; Rekha Sanghavi, Wexham Park Hospital; Caroline Sullivan, Whipps Cross  
7 University Hospital; Laweh Amegavie, Whiston Hospital; ER Broadhurd, Whittington  
8 Hospital; David Long, William Harvey Hospital; Andrew Gallagher, Worcestershire Royal  
9 Hospital; Anil Garg, Worthing Hospital; Megan Eaton, Yeovil District Hospital; Guy Millman,  
10 York District Hospital.  
11  
12  
13  
14  
15  
16  
17  
18  
19

### 20 **Contributors:**

21  
22  
23 SW conceived the study; SW, WA, and SP contributed to developing the econometric  
24 methodology for the study; SW prepared the data for analysis; SW, WA, SP, NMa, AM, ED,  
25 and NMo contributed to covariate selection and interpretation of the results; SS managed the  
26 extraction and cleaning of NNRD variables; SW prepared the first draft of the paper; this and  
27 all subsequent drafts were reviewed and revised by all authors; all authors approved the final  
28 version submitted.  
29  
30  
31  
32  
33  
34  
35

### 36 **Funding:**

37  
38  
39 The Neonatal Data Analysis Unit is supported in part by a Programme Grant for Applied  
40 Research (RP-PG-0707-10010) from the National Institute of Health Research (NIHR) and  
41 unrestricted funding from the Department of Health, Danone, and Abbott International. SW  
42 receives funding from Bliss and the Department of Economics, University of Warwick. NMa  
43 receives part funding from the Department of Health's NIHR Biomedical Research Centre's  
44 funding scheme at UCLH/UCL. Bliss also provides funding for the NESOP group. The  
45 study funders had no role in study design, collection, analysis, and interpretation of data,  
46 writing of the report, or in the decision to submit the article for publication.  
47  
48  
49  
50  
51  
52  
53  
54  
55

### 56 **Competing interests:**

1  
2  
3  
4  
5  
6  
7  
8  
9  
10  
11  
12  
13  
14  
15  
16  
17  
18  
19  
20  
21  
22  
23  
24  
25  
26  
27  
28  
29  
30  
31  
32  
33  
34  
35  
36  
37  
38  
39  
40  
41  
42  
43  
44  
45  
46  
47  
48  
49  
50  
51  
52  
53  
54  
55  
56  
57  
58  
59  
60

None declared.

**Ethical approval:**

This study was carried out with the National Neonatal Research Database (REC 10/H0803/151) as part of NESCOP undertaken with permission from NHS Trust Caldicott Guardian.

For peer review only

## References

- 1 Lasswell SM, Barfield WD, Rochat RW, *et al.* Perinatal regionalization for very low-birth-weight and very preterm infants: a meta-analysis. *JAMA: the journal of the American Medical Association* 2010;**304**:992–1000.
- 2 Phibbs CS, Baker LC, Caughey AB, *et al.* Level and volume of neonatal intensive care and mortality in very-low-birth-weight infants. *The New England journal of medicine* 2007;**356**:2165–75.
- 3 Cifuentes J, Bronstein J, Phibbs CS, *et al.* Mortality in Low Birth Weight Infants According to Level of Neonatal Care at Hospital of Birth. *Pediatrics* 2002;**109**:745–51.
- 4 Chung JH, Phibbs CS, Boscardin WJ, *et al.* The effect of neonatal intensive care level and hospital volume on mortality of very low birth weight infants. *Medical care* 2010;**48**:635–44.
- 5 Rogowski J a, Horbar JD, Staiger DO, *et al.* Indirect vs direct hospital quality indicators for very low-birth-weight infants. *JAMA: the journal of the American Medical Association* 2004;**291**:202–9.
- 6 Bartels DB, Wypij D, Wenzlaff P, *et al.* Hospital volume and neonatal mortality among very low birth weight infants. *Pediatrics* 2006;**117**:2206–14.
- 7 Lorch S a, Baiocchi M, Ahlberg CE, *et al.* The differential impact of delivery hospital on the outcomes of premature infants. *Pediatrics* 2012;**130**:270–8.
- 8 Fellman V, Hellström-Westas L, Norman M, *et al.* One-year survival of extremely preterm infants after active perinatal care in Sweden. *JAMA: the journal of the American Medical Association* 2009;**301**:2225–33.
- 9 Johansson S, Montgomery SM, Ekblom A, *et al.* Preterm delivery, level of care, and infant death in sweden: a population-based study. *Pediatrics* 2004;**113**:1230–5.

- 1  
2  
3 10 Rautava L, Lehtonen L, Peltola M, *et al.* The effect of birth in secondary- or tertiary-  
4 level hospitals in Finland on mortality in very preterm infants: a birth-register study.  
5  
6 *Pediatrics* 2007;**119**:e257–63.  
7  
8  
9  
10 11 Synnes AR, Macnab YC, Qiu Z, *et al.* Neonatal intensive care unit characteristics  
11 affect the incidence of severe intraventricular hemorrhage. *Medical care*  
12  
13 2006;**44**:754–9.  
14  
15  
16 12 Phibbs CS. Managed clinical networks in neonatal care. *BMJ* 2012;**344**:e2423–e2423.  
17  
18  
19 13 Department of Health. Report of Department of Health Working Group on Neonatal  
20 Intensive Care Services. London: 2003.  
21  
22  
23 14 Gale C, Santhakumaran S, Nagarajan S, *et al.* Impact of managed clinical networks  
24 on NHS specialist neonatal services in England: population based study. *Bmj*  
25  
26 2012;**344**:e2105–e2105.  
27  
28  
29 15 Tucker J. Patient volume, staffing, and workload in relation to risk-adjusted outcomes  
30 in a random stratified sample of UK neonatal intensive care units: a prospective  
31 evaluation. *Lancet* 2002;**359**:99–107.  
32  
33  
34 16 Hamilton KESC, Redshaw ME, Tarnow-Mordi W. Nurse staffing in relation to risk-  
35 adjusted mortality in neonatal care. *Archives of disease in childhood Fetal and*  
36 *neonatal edition* 2007;**92**:F99–F103.  
37  
38  
39 17 Van Reempts P, Gortner L, Milligan D, *et al.* Characteristics of neonatal units that  
40 care for very preterm infants in Europe: results from the MOSAIC study. *Pediatrics*  
41  
42 2007;**120**:e815–25.  
43  
44  
45 18 Ehrenkranz RA, Walsh MC, Vohr BR, *et al.* Validation of the National Institutes of  
46 Health consensus definition of bronchopulmonary dysplasia. *Pediatrics*  
47  
48 2005;**116**:1353–60.  
49  
50  
51 19 Medlock S, Ravelli ACJ, Tamminga P, *et al.* Prediction of mortality in very premature  
52 infants: a systematic review of prediction models. *PloS one* 2011;**6**:e23441.  
53  
54  
55  
56  
57  
58  
59  
60



- 1  
2  
3 20 Noble M, McLennan D, Wilkinson K, *et al*. The English indices of deprivation 2007.  
4  
5 2007.  
6  
7 21 British Association of Perinatal Medicine. Categories of Care 2011. Categories of  
8  
9 Care 2011.  
10  
11 2011.[http://www.bapm.org/publications/documents/guidelines/CatsofcarereportAug11.](http://www.bapm.org/publications/documents/guidelines/CatsofcarereportAug11.pdf)  
12  
13 pdf (accessed 12 Jun2012).  
14  
15  
16 22 Office for National Statistics. Super Output Areas.  
17  
18 2011.[http://www.ons.gov.uk/ons/guide-method/geography/beginner-s-](http://www.ons.gov.uk/ons/guide-method/geography/beginner-s-guide/census/super-output-areas--soas-/index.html)  
19  
20 guide/census/super-output-areas--soas-/index.html (accessed 12 Feb 2013).  
21  
22 23 Smith LK, Draper ES, Manktelow BN, *et al*. Socioeconomic inequalities in very  
23  
24 preterm birth rates. *Archives of disease in childhood Fetal and neonatal edition*  
25  
26 2007;**92**:F11–4.  
27  
28  
29 24 Terza J V, Basu A, Rathouz PJ. Two-stage residual inclusion estimation: addressing  
30  
31 endogeneity in health econometric modeling. *Journal of health economics*  
32  
33 2008;**27**:531–43.  
34  
35 25 Tsai AC, Votruba M, Bridges JFP, *et al*. Overcoming bias in estimating the volume-  
36  
37 outcome relationship. *Health services research* 2006;**41**:252–64.  
38  
39  
40 26 Imbens G, Angrist J. Identification and estimation of local average treatment effects.  
41  
42 *Econometrica: Journal of the Econometric Society* 1994;**62**:467–75.  
43  
44 27 Heller G, Richardson DK, Schnell R, *et al*. Are we regionalized enough? Early-  
45  
46 neonatal deaths in low-risk births by the size of delivery units in Hesse, Germany  
47  
48 1990-1999. *International journal of epidemiology* 2002;**31**:1061–8.  
49  
50  
51 28 Moster D, Lie RT, Markestad T. Relation between size of delivery unit and neonatal  
52  
53 death in low risk deliveries: population based study. *Archives of disease in childhood*  
54  
55 *Fetal and neonatal edition* 1999;**80**:F221–5.  
56  
57  
58  
59  
60

- 1  
2  
3 29 Mistry H, Dowie R, Franklin RCG, *et al.* Costs of neonatal care for low-birthweight  
4 babies in English hospitals. *Acta paediatrica (Oslo, Norway)*: 1992) 2009;**98**:1123–9.  
5  
6  
7 30 Gale C, Hay A, Philipp C, *et al.* In-utero transfer is too difficult: results from a  
8 prospective study. *Early human development* 2012;**88**:147–50.  
9  
10  
11 31 Delamothe T, Godlee F. Dr Lansley's Monster. *BMJ* 2011;**342**:d408–d408.  
12  
13  
14  
15  
16  
17  
18  
19  
20  
21  
22  
23  
24  
25  
26  
27  
28  
29  
30  
31  
32  
33  
34  
35  
36  
37  
38  
39  
40  
41  
42  
43  
44  
45  
46  
47  
48  
49  
50  
51  
52  
53  
54  
55  
56  
57  
58  
59  
60

For peer review only

**Table 1** Descriptive statistics for preterm infants born  $\leq 32^{+6}$  weeks gestation by neonatal unit characteristic at the hospital of birth

|                                                       | Designation of unit |                         |                      | Volume of unit <sup>a</sup> |                      |                      |
|-------------------------------------------------------|---------------------|-------------------------|----------------------|-----------------------------|----------------------|----------------------|
|                                                       | Tertiary level unit | Non-tertiary level unit | p-value <sup>b</sup> | High volume unit            | Non-high volume unit | p-value <sup>b</sup> |
| n (%)                                                 | 9,466 (46.1)        | 11,088 (54.0)           |                      | 9,541 (46.4)                | 11,013 (53.6)        |                      |
| Gestation (weeks), mean (SD)                          | 29.2 (2.5)          | 30.0 (2.1)              | <0.001               | 29.3 (2.5)                  | 29.9 (2.2)           | <0.001               |
| Birth weight (g), mean (SD)                           | 1,313.9 (438.7)     | 1,451.9 (404.5)         | <0.001               | 1326.6 (436.7)              | 1441.8 (409.4)       | <0.001               |
| Received full or partial course of antenatal steroids | 6,394 (67.6)        | 7,262 (65.5)            | 0.002                | 6,330 (66.4)                | 7,326 (66.5)         | 0.790                |
| Deprivation score bottom 10%                          | 2,020 (21.4)        | 1,342 (12.1)            | <0.001               | 1,730 (18.1)                | 1,632 (14.8)         | <0.001               |
| Male                                                  | 5,048 (53.3)        | 5,397 (53.4)            | 0.756                | 5,093 (53.4)                | 5,892 (53.5)         | 0.863                |
| Neonatal mortality                                    | 423 (4.5)           | 366 (3.3)               | <0.001               | 394 (4.1)                   | 395 (3.6)            | 0.043                |
| Any in-hospital mortality                             | 569 (6.0)           | 425 (3.8)               | <0.001               | 527 (5.5)                   | 467 (4.2)            | <0.001               |
| BPD <sup>c</sup>                                      | 3,695 (39.0)        | 2,856 (25.8)            | <0.001               | 3,548 (37.2)                | 3,003 (27.3)         | <0.001               |
| Treatment for ROP                                     | 226 (2.4)           | 107 (1.0)               | <0.001               | 195 (2.0)                   | 138 (1.3)            | <0.001               |
| Surgery for NEC                                       | 167 (1.8)           | 123 (1.1)               | <0.001               | 163 (1.7)                   | 127 (1.2)            | 0.001                |
| PMA <sup>d</sup> at discharge >40 <sup>+0</sup> weeks | 1,292 (13.7)        | 848 (7.7)               | <0.001               | 1,237 (13.0)                | 903 (8.2)            | <0.001               |

All values are n (%) unless otherwise stated.

<sup>a</sup> High volume was defined as being in the top quartile of units by number of care days provided to infants born at  $\leq 32^{+6}$  weeks gestation.

<sup>b</sup> Continuous variables were tested by t-test, categorical variables by chi-squared test.

<sup>c</sup> Bronchopulmonary dysplasia (BPD) defined as requirement of supplementary oxygen for at least 28 days post birth and at 36 weeks postmenstrual age.

<sup>d</sup> PMA at discharge = postmenstrual age at discharge, equal to gestational age at birth plus length of stay in weeks.

1  
2  
3  
4  
5  
6  
7  
8  
9  
10  
11  
12  
13  
14  
15  
16  
17  
18  
19  
20  
21  
22  
23  
24  
25  
26  
27  
28  
29  
30  
31  
32  
33  
34  
35  
36  
37  
38  
39  
40  
41  
42  
43  
44  
45  
46  
47  
48  
49

**Table 2** Adjusted odds ratios for outcomes associated with admission to either tertiary or high volume neonatal care at the hospital of birth using a “standard” logistic regression model

| Outcome                    | Tertiary neonatal unit  |                         |                                          | High volume neonatal unit <sup>a</sup> |                         |                                          |
|----------------------------|-------------------------|-------------------------|------------------------------------------|----------------------------------------|-------------------------|------------------------------------------|
|                            | (1)                     | (2)                     | (3)                                      | (4)                                    | (5)                     | (6)                                      |
|                            | ≤32 <sup>+6</sup> weeks | ≤26 <sup>+6</sup> weeks | 27 <sup>+0</sup> -32 <sup>+6</sup> weeks | ≤32 <sup>+6</sup> weeks                | ≤26 <sup>+6</sup> weeks | 27 <sup>+0</sup> -32 <sup>+6</sup> weeks |
| Neonatal mortality         | 0.77<br>(0.59-1.00)     | 0.65*<br>(0.46-0.91)    | 0.92<br>(0.69-1.22)                      | 0.73*<br>(0.56-0.95)                   | 0.62**<br>(0.44-0.87)   | 0.86<br>(0.65-1.14)                      |
| Any in-hospital mortality  | 0.91<br>(0.72-1.15)     | 0.78<br>(0.57-1.06)     | 1.06<br>(0.83-1.36)                      | 0.83<br>(0.65-1.05)                    | 0.71*<br>(0.52-0.97)    | 0.96<br>(0.75-1.24)                      |
| BPD                        | 1.23**<br>(1.07-1.40)   | 1.50**<br>(1.11-2.01)   | 1.17<br>(0.99-1.39)                      | 1.11<br>(0.97-1.28)                    | 1.59**<br>(1.18-2.14)   | 1.02<br>(0.86-1.22)                      |
| Treatment for ROP          | 1.26<br>(0.91-1.75)     | 1.09<br>(0.76-1.57)     | 1.52<br>(0.91-2.55)                      | 0.95<br>(0.68-1.32)                    | 0.81<br>(0.56-1.17)     | 1.22<br>(0.71-2.09)                      |
| Surgery for NEC            | 1.05<br>(0.76-1.44)     | 0.89<br>(0.58-1.36)     | 1.17<br>(0.80-1.70)                      | 1.05<br>(0.76-1.45)                    | 0.94<br>(0.62-1.45)     | 1.11<br>(0.76-1.61)                      |
| PMA at discharge >40 weeks | 1.17<br>(0.97-1.41)     | 1.09<br>(0.87-1.37)     | 1.19<br>(0.97-1.47)                      | 1.13<br>(0.94-1.37)                    | 1.11<br>(0.89-1.38)     | 1.11<br>(0.90-1.37)                      |

Values are odd ratios (95% confidence interval). \* p<0.05, \*\* p<0.01, \*\*\* p<0.001

BPD=Bronchopulmonary Dysplasia, PMA at discharge=postmenstrual age at discharge, equal to gestational age at birth plus the length of stay in weeks. Models are adjusted for gestational age, gestational age squared, birthweight z score, use of antenatal steroids, gender, infant year of birth and deprivation.

<sup>a</sup> High volume was defined as being in the top quartile of units by number of care days provided to infants born at ≤32<sup>+6</sup> weeks gestation.

**Table 3** Descriptive statistics for the sample of preterm infants born  $\leq 32^{+6}$  weeks gestation by designation of the neonatal unit nearest to maternal place of residence

|                                                       | Unit level designation      |                                 |                      |                                                    | Unit volume <sup>a</sup> |                              |                      |                                                    |
|-------------------------------------------------------|-----------------------------|---------------------------------|----------------------|----------------------------------------------------|--------------------------|------------------------------|----------------------|----------------------------------------------------|
|                                                       | Nearest unit tertiary level | Nearest unit non-tertiary level | p-value <sup>b</sup> | p-value <sup>c</sup> , controlling for deprivation | Nearest unit high volume | Nearest unit non-high volume | p-value <sup>b</sup> | p-value <sup>c</sup> , controlling for deprivation |
| n (%)                                                 | 7,167 (34.9)                | 13,387 (65.1)                   |                      |                                                    | 7,357 (35.8)             | 13,197 (64.2)                |                      |                                                    |
| Gestation (weeks), mean (SD)                          | 29.6 (2.4)                  | 29.7 (2.3)                      | 0.040                | 0.418                                              | 29.6 (2.4)               | 29.6 (2.3)                   | 0.181                | 0.526                                              |
| Birth weight (g), mean (SD)                           | 1377.4 (429.2)              | 1394.2 (424.5)                  | 0.007                | 0.262                                              | 1376.7 (426.7)           | 1394.8 (425.7)               | 0.004                | 0.111                                              |
| Received Full or partial course of antenatal steroids | 4,703 (65.6)                | 8,953 (66.9)                    | 0.069                | 0.584                                              | 4,749 (64.6)             | 8,907 (67.5)                 | <0.001               | 0.052                                              |
| Deprivation score -bottom 10%                         | 1,751 (24.4)                | 1,611 (12.0)                    | <0.001               | NA                                                 | 1,476 (20.1)             | 1,886 (14.3)                 | <0.001               | NA                                                 |
| Male                                                  | 3,820 (53.3)                | 7,165 (53.5)                    | 0.761                | 0.854                                              | 3,958 (53.8)             | 7,027 (53.3)                 | 0.447                | 0.378                                              |
| Birth in hospital with tertiary level unit            | 4,753 (88.4)                | 2,290 (22.5)                    | <0.001               | <0.001                                             | 3,839 (69.5)             | 3,204 (31.9)                 | <0.001               | <0.001                                             |
| Birth in hospital with high volume unit               | 3,703 (68.9)                | 3,374 (33.1)                    | <0.001               | <0.001                                             | 4,764 (86.3)             | 2,313 (23.0)                 | <0.001               | <0.001                                             |

All values are n (%) and are a proportion of the column total unless otherwise stated.

<sup>a</sup> High volume was defined as being in the top quartile of units by number of care days provided to infants born at  $\leq 32^{+6}$  weeks gestation.

<sup>b</sup> Continuous variables were tested by t-test, categorical variables by chi-squared test.

<sup>c</sup> P-value of F-test of coefficient on instrument from a regression of variable of interest on instrument and deprivation indicator.

**Table 4** Adjusted odds ratios for outcomes associated with admission to either tertiary or high volume neonatal care at the hospital of birth using an instrumental variable logistic regression model

| Outcome                                  | Tertiary neonatal unit         |                                |                                                 | High volume neonatal unit <sup>a</sup> |                                |                                                 |
|------------------------------------------|--------------------------------|--------------------------------|-------------------------------------------------|----------------------------------------|--------------------------------|-------------------------------------------------|
|                                          | (1)<br>≤32 <sup>+6</sup> weeks | (2)<br>≤26 <sup>+6</sup> weeks | (3)<br>27 <sup>+0</sup> -32 <sup>+6</sup> weeks | (4)<br>≤32 <sup>+6</sup> weeks         | (5)<br>≤26 <sup>+6</sup> weeks | (6)<br>27 <sup>+0</sup> -32 <sup>+6</sup> weeks |
| Neonatal Mortality                       | 0.87<br>(0.66-1.15)            | 1.01<br>(0.63-1.61)            | 0.82<br>(0.58-1.14)                             | 0.70*<br>(0.53-0.92)                   | 0.54**<br>(0.33-0.87)          | 0.80<br>(0.56-1.13)                             |
| Any in hospital mortality                | 0.85<br>(0.68-1.06)            | 0.95<br>(0.62-1.44)            | 0.84<br>(0.64-1.10)                             | 0.68**<br>(0.54-0.85)                  | 0.51**<br>(0.33-0.79)          | 0.80<br>(0.60-1.07)                             |
| BPD                                      | 1.19<br>(0.95-1.49)            | 1.04<br>(0.66-1.64)            | 1.17<br>(0.91-1.51)                             | 1.05<br>(0.85-1.29)                    | 1.78**<br>(1.12-2.81)          | 0.96<br>(0.75-1.22)                             |
| Treatment for ROP                        | 1.91*<br>(1.16-3.14)           | 1.57<br>(0.83-2.96)            | 2.17*<br>(1.06-4.47)                            | 1.02<br>(0.60-1.73)                    | 0.58<br>(0.29-1.15)            | 1.84<br>(0.83-4.05)                             |
| Surgery for NEC                          | 1.17<br>(0.72-1.90)            | 0.81<br>(0.40-1.66)            | 1.34<br>(0.76-2.38)                             | 1.26<br>(0.76-2.07)                    | 1.11<br>(0.54-2.28)            | 1.35<br>(0.75-2.43)                             |
| PMA at discharge >40 <sup>+0</sup> weeks | 0.95<br>(0.73-1.22)            | 0.83<br>(0.60-1.13)            | 0.97<br>(0.72-1.31)                             | 0.92<br>(0.72-1.17)                    | 1.04<br>(0.78-1.40)            | 0.86<br>(0.67-1.14)                             |

Values are odd ratios (95% confidence interval). \* p<0.05, \*\* p<0.01, \*\*\* p<0.001

BPD=Bronchopulmonary Dysplasia, PMA at discharge=postmenstrual age at discharge, equal to gestational age at birth plus the length of stay in weeks. Models are adjusted for gestational age, gestational age squared, birthweight z score, use of antenatal steroids, gender, infant year of birth and deprivation.

<sup>a</sup> High volume was defined as being in the top quartile of units by number of care days provided to infants born at ≤32<sup>+6</sup> weeks gestation

## Online Appendix A: Methodology

### Instrumental variables

#### Description and interpretation

The instrumental variables methodology can be readily compared to a randomised controlled trial (RCT) for estimating the effects of a particular treatment on patient clinical outcomes. In this study we explore two possible 'treatments', a high level neonatal unit at the place of birth and high volume neonatal unit at the place of birth. Our study group is composed of infants admitted to neonatal care since we do not observe infants who died prior to admission. A RCT would have allowed us to estimate the effect of the treatment by comparing the effect for the treated group with that of a control group (those infants admitted to low level or low volume neonatal units at hospitals of birth). This assumes that the outcomes of the control group replicate what would have happened to the treated group had they been in the control group. This is called the *causal effect of the treatment*; in this case defined as the difference between the outcome for an infant born in a hospital with and admitted to a high level or high volume neonatal unit and the outcome for the same infant had that infant been born in a hospital and admitted to a low level or low volume neonatal unit. The latter outcome is a counterfactual and is not observed. For every infant, only one of the outcomes is observed.

In the absence of a RCT we use an instrumental variables methodology which acts as an *ex post* randomisation. The purpose of an instrumental variable is to randomly assign infants to treatment and control groups. We assume that the mothers are taken to the nearest hospital for delivery. In order to use the characteristics of the nearest neonatal unit as instruments, we further assume that individuals in the population do not choose where they live on the basis of the level or volume of the nearest neonatal unit. This assumption needs to hold conditional on the other variables. For example, high volume units may be located in socioeconomically deprived areas where there are also a disproportionate number of very preterm infants. The instrument is valid provided we control for socioeconomic deprivation in our analyses so that the location of the mother's residence is not related to the level and volume of the nearest neonatal unit. In a RCT, the instrumental variable is the randomisation process itself.

We additionally assume that the effect of the treatment is heterogeneous since the effect of admission to a high level or high volume neonatal unit at the hospital of birth may be dependent on an infant's health.

As in the RCT setting, there are four types of individuals with respect to our treatment and instrumental variable:

*Compliers*: mothers who give birth in the nearest hospital regardless of whether it has a high level unit or not – if a mother lives near a high (low) level unit, then she gives birth in the hospital with a high (low) level unit.

*Always-takers*: mothers who always go to a hospital with a high level or high volume unit. This could be mothers who have been assessed to be better off having the baby in a high level unit and they go there regardless of the distance.

*Never-takers*: mothers who always go to a hospital with a low level or low volume unit. This could be because there is a policy that all mothers are taken to a low level unit without taking the risk into account and then infants are transferred after birth. This is unlikely and as such there are unlikely to be never-takers.

*Defiers*: women who do the opposite of compliers. There are unlikely to be mothers that fall into this group.

The only groups affected by the instrument are compliers and defiers. Since there are unlikely to be any defiers, the treatment effect estimated using an instrumental variables methodology is the effect of the treatment for compliers. This is known as the local average treatment effect (LATE).[1] There are two assumptions required for estimation of the LATE: i) that the effect of the treatment is either positive or negative for everyone, and ii) the probability of birth in a hospital with and admission to a high level or volume neonatal unit is greater the closer the mother lives to the unit. Both of these assumptions rule out defiers.

A "standard" analysis does not take into account the fact that treatment and control groups in an observational study may not be directly comparable.

#### Relationship to postnatal transfers

The previous discussion identifies how an instrumental variables methodology can be used to identify treatment effects in observational studies with a non-randomised treatment. An important part of the managed clinical network system in place in England is the provision of postnatal transfers. The question that this poses is whether postnatal transfers can be used to counteract the effect of a low volume neonatal unit at the place of birth. However, this requires identification of the effect of postnatal transfers among infants who were transferred had they not been transferred. There is not a valid control group for this. In particular, as this paper has demonstrated, the neonatal unit at the hospital of birth has an effect on the odds of mortality; the neonatal unit at the hospital of birth therefore has an effect on the probability of receiving a postnatal transfer. Hence, those infants who survive and receive a postnatal transfer will be observably and unobservably different from their counterparts not receiving a postnatal transfer.

In order to be able to identify the effect of postnatal transfers we could use an instrumental variables methodology. However, there is not a suitable candidate for an instrumental variable for postnatal transfer. A possible contender is the cot occupancy of the neonatal unit at the time of birth since this will increase the probability of transfer without affecting infant health. However, as the previous section discusses, an instrumental variables methodology identifies the treatment effect among compliers with the instrument. This group of infants is not of significant clinical interest as interest lies with those infants who may benefit from postnatal transfer to high level neonatal care regardless of the capacity of the current neonatal unit (always takers).

### Technical description

The instrumental variables methodology requires two steps. Let  $y_i$  be a binary outcome equal to one if the infant  $i$  experiences the outcome and zero otherwise,  $D_i$  is a binary indicator equal to one if the unit at the hospital of birth was either high level or high volume and zero otherwise,  $x_i$  is a vector of variables explaining infant health outcomes up to the point of birth, and  $z_i$  is the vector of instruments. In the first step we estimate:

$$Pr(D_i | x_i, z_i) = \text{logit}(\lambda + x_i' \pi + z_i' \delta) \quad (1)$$

After estimating (1), the predicted values of the treatment are calculated as

$$\widehat{D}_i = \text{logit}(\widehat{\lambda} + x_i' \widehat{\pi} + z_i' \widehat{\delta}) \quad (2)$$

where the hat indicates an estimated value. The residuals are obtained as  $\widehat{v}_i = D_i - \widehat{D}_i$ .

The second stage is then

$$Pr(y_i | x_i, D_i, \widehat{v}_i) = \text{logit}(\alpha + x_i' \beta + D_i \gamma + \widehat{v}_i \rho) \quad (3)$$

The difference between the "standard" logistic regression and the instrumental variables logistic regression is the inclusion of  $\widehat{v}_i$ .

### References for Appendix A

[1] Imbens, G. & Angrist, J., 1994. Identification and estimation of local average treatment effects. *Econometrica: Journal of the Econometric Society*, 62(2), pp.467–475.



1  
2  
3  
4  
5  
6  
7  
8  
9  
10  
11  
12  
13  
14  
15  
16  
17  
18  
19  
20  
21  
22  
23  
24  
25  
26  
27  
28  
29  
30  
31  
32  
33  
34  
35  
36  
37  
38  
39  
40  
41  
42  
43  
44  
45  
46  
47  
48  
49

**Online Appendix B: Results from sensitivity analyses**

For peer review only

**Table B1** Adjusted odds ratios for outcomes associated with admission to either tertiary or high volume neonatal care at the hospital of birth using an instrumental variable logistic regression model; infants with missing data excluded

| Outcome                                  | Tertiary neonatal unit                     |                                           |                                                             | High volume neonatal unit <sup>a</sup>     |                                           |                                                             |
|------------------------------------------|--------------------------------------------|-------------------------------------------|-------------------------------------------------------------|--------------------------------------------|-------------------------------------------|-------------------------------------------------------------|
|                                          | (1)<br>≤32 <sup>+6</sup> weeks<br>n=19,382 | (2)<br>≤26 <sup>+6</sup> weeks<br>n=2,452 | (3)<br>27 <sup>+0</sup> -32 <sup>+6</sup> weeks<br>n=16,930 | (4)<br>≤32 <sup>+6</sup> weeks<br>n=19,382 | (5)<br>≤26 <sup>+6</sup> weeks<br>n=2,452 | (6)<br>27 <sup>+0</sup> -32 <sup>+6</sup> weeks<br>n=16,930 |
| Neonatal Mortality                       | 0.88<br>(0.67-1.17)                        | 1.03<br>(0.63-1.69)                       | 0.82<br>(0.59-1.14)                                         | 0.68**<br>(0.52-0.90)                      | 0.51**<br>(0.31-0.84)                     | 0.80<br>(0.57-1.11)                                         |
| Any in hospital mortality                | 0.85<br>(0.67-1.08)                        | 0.95<br>(0.61-1.47)                       | 0.84<br>(0.64-1.11)                                         | 0.67**<br>(0.53-0.84)                      | 0.50**<br>(0.32-0.79)                     | 0.79<br>(0.59-1.05)                                         |
| BPD                                      | 1.16<br>(0.93-1.44)                        | 1.01<br>(0.64-1.61)                       | 1.15<br>(0.90-1.46)                                         | 1.03<br>(0.84-1.26)                        | 1.86**<br>(1.17-2.97)                     | 0.94<br>(0.74-1.18)                                         |
| Treatment for ROP                        | 1.93*<br>(1.16-3.21)                       | 1.76<br>(0.91-3.77)                       | 1.94<br>(0.93-4.06)                                         | 1.04<br>(0.61-1.77)                        | 0.63<br>(0.32-1.27)                       | 1.79<br>(0.81-3.95)                                         |
| Surgery for NEC                          | 1.04<br>(0.63-1.73)                        | 0.68<br>(0.32-1.45)                       | 1.24<br>(0.68-2.24)                                         | 1.24<br>(0.73-2.09)                        | 1.02<br>(0.48-2.16)                       | 1.38<br>(0.75-2.54)                                         |
| PMA at discharge >40 <sup>+0</sup> weeks | 0.94<br>(0.73-1.22)                        | 0.84<br>(0.60-1.18)                       | 0.97<br>(0.71-1.32)                                         | 0.93<br>(0.73-1.19)                        | 1.06<br>(0.78-1.46)                       | 0.88<br>(0.66-1.16)                                         |

Values are odd ratios (95% confidence interval). \* p<0.05, \*\* p<0.01, \*\*\* p<0.001

BPD=Bronchopulmonary Dysplasia, PMA at discharge=postmenstrual age at discharge, equal to gestational age at birth plus the length of stay in weeks. Models are adjusted for gestational age, gestational age squared, birthweight z score, use of antenatal steroids, gender, infant year of birth and deprivation.

<sup>a</sup> High volume was defined as being in the top quartile of units by number of care days provided to infants born at ≤32<sup>+6</sup> weeks gestation.

**Table B2** Adjusted odds ratios for morbidities associated with admission to either tertiary or high volume neonatal care at the hospital of birth using an instrumental variable logistic regression model; infants who died excluded from morbidity outcome

| Outcome                              | Tertiary neonatal unit                     |                                           |                                                             | High volume neonatal unit <sup>a</sup>     |                                           |                                                             |
|--------------------------------------|--------------------------------------------|-------------------------------------------|-------------------------------------------------------------|--------------------------------------------|-------------------------------------------|-------------------------------------------------------------|
|                                      | (1)<br>≤32 <sup>+6</sup> weeks<br>n=19,560 | (2)<br>≤26 <sup>+6</sup> weeks<br>n=1,987 | (3)<br>27 <sup>+0</sup> -32 <sup>+6</sup> weeks<br>n=17,573 | (4)<br>≤32 <sup>+6</sup> weeks<br>n=19,560 | (5)<br>≤26 <sup>+6</sup> weeks<br>n=1,987 | (6)<br>27 <sup>+0</sup> -32 <sup>+6</sup> weeks<br>n=17,573 |
| BPD                                  | 1.15<br>(0.88-1.52)                        | 1.07<br>(0.30-3.80)                       | 1.16<br>(0.88-1.52)                                         | 0.93<br>(0.72-1.22)                        | 0.88<br>(0.25-3.04)                       | 0.94<br>(0.72-1.22)                                         |
| Treatment for ROP                    | 1.96*<br>(1.15-3.32)                       | 1.73<br>(0.87-3.45)                       | 2.13*<br>(1.04-4.40)                                        | 0.93<br>(0.53-1.65)                        | 0.49<br>(0.23-1.03)                       | 1.80<br>(0.81-3.99)                                         |
| Surgery for NEC                      | 1.12<br>(0.66-1.90)                        | 0.80<br>(0.36-1.76)                       | 1.29<br>(0.71-2.33)                                         | 1.11<br>(0.65-1.89)                        | 0.82<br>(0.37-1.82)                       | 1.29<br>(0.70-2.38)                                         |
| PMA >40 <sup>+0</sup> weeks          | 0.89<br>(0.67-1.19)                        | 0.78<br>(0.53-1.15)                       | 0.94<br>(0.69-1.28)                                         | 0.83<br>(0.63-1.08)                        | 0.78<br>(0.53-1.13)                       | 0.85<br>(0.63-1.13)                                         |
| Any in-hospital mortality and/or BPD | 1.13<br>(0.88-1.45)                        | N/A <sup>b</sup>                          | 1.13<br>(0.88-1.45)                                         | 0.92<br>(0.72-1.17)                        | 0.83<br>(0.24-2.86)                       | 0.92<br>(0.72-1.17)                                         |

Values are odd ratios (95% confidence interval). \* p<0.05, \*\* p<0.01, \*\*\* p<0.001

BPD=Bronchopulmonary Dysplasia, PMA at discharge=postmenstrual age at discharge, equal to gestational age at birth plus the length of stay in weeks. Models are adjusted for gestational age, gestational age squared, birthweight z score, use of antenatal steroids, gender, infant year of birth and deprivation.

<sup>a</sup> High volume was defined as being in the top quartile of units by number of care days provided to infants born at ≤32<sup>+6</sup> weeks gestation.

<sup>b</sup> Unable to estimate due to too few negative outcomes

**Table B3** Adjusted odds ratios for outcomes associated with admission to high volume neonatal care at the hospital of birth using an instrumental variable logistic regression model; alternative definitions of 'high volume'

| Outcome                   | High volume defined as top 25% by number of intensive care days provided to infants $\leq 32^{+6}$ weeks |                             |                                | High volume defined as top 25% by number of $\leq 32^{+6}$ weeks births in hospital |                             |                                |
|---------------------------|----------------------------------------------------------------------------------------------------------|-----------------------------|--------------------------------|-------------------------------------------------------------------------------------|-----------------------------|--------------------------------|
|                           | (1)<br>$\leq 32^{+6}$ weeks                                                                              | (2)<br>$\leq 26^{+6}$ weeks | (3)<br>$27^{+0}-32^{+6}$ weeks | (4)<br>$\leq 32^{+6}$ weeks                                                         | (5)<br>$\leq 26^{+6}$ weeks | (6)<br>$27^{+0}-32^{+6}$ weeks |
| Neonatal Mortality        | 0.73*<br>(0.56-0.96)                                                                                     | 0.73<br>(0.45-1.19)         | 0.71*<br>(0.52-0.98)           | 0.81<br>(0.61-1.06)                                                                 | 0.78<br>(0.49-1.24)         | 0.82<br>(0.59-1.13)            |
| Any in hospital mortality | 0.67**<br>(0.53-0.86)                                                                                    | 0.65*<br>(0.43-1.00)        | 0.69*<br>(0.50-0.94)           | 0.75*<br>(0.59-0.94)                                                                | 0.69<br>(0.45-1.07)         | 0.79<br>(0.60-1.05)            |
| BPD                       | 0.98<br>(0.79-1.23)                                                                                      | 1.28<br>(0.81-2.02)         | 0.93<br>(0.72-1.19)            | 1.09<br>(0.88-1.35)                                                                 | 1.41<br>(0.91-2.17)         | 1.02<br>(0.79-1.32)            |
| Surgery for ROP           | 0.96<br>(0.56-1.57)                                                                                      | 0.55<br>(0.28-1.06)         | 1.50<br>(0.66-3.43)            | 1.27<br>(0.76-2.13)                                                                 | 0.71<br>(0.36-1.42)         | 1.19<br>(0.88-4.14)            |
| Surgery for NEC           | 1.16<br>(0.73-1.86)                                                                                      | 1.11<br>(0.54-2.28)         | 1.22<br>(0.69-2.17)            | 1.10<br>(0.67-1.81)                                                                 | 0.95<br>(0.48-1.89)         | 1.15<br>(0.63-2.13)            |
| PMA $>40^{+0}$ weeks      | 0.81<br>(0.63-1.04)                                                                                      | 0.87<br>(0.65-1.17)         | 0.78<br>(0.58-1.04)            | 0.86<br>(0.67-1.10)                                                                 | 0.88<br>(0.64-1.21)         | 0.83<br>(0.62-1.10)            |

Values are odd ratios (95% confidence interval). \*  $p < 0.05$ , \*\*  $p < 0.01$ , \*\*\*  $p < 0.001$

BPD=Bronchopulmonary Dysplasia, PMA at discharge=postmenstrual age at discharge, equal to gestational age at birth plus the length of stay in weeks. Models are adjusted for gestational age, gestational age squared, birthweight z score, use of antenatal steroids, gender, infant year of birth and deprivation.

**Table B3** Adjusted odds ratios for outcomes associated with admission to high volume neonatal care at the hospital of birth using an instrumental variable logistic regression model; alternative definitions of 'high volume'

| High volume defined as top 25% by number of intensive care days provided to infants $\leq 32^{+6}$ weeks |                             |                             |                                |
|----------------------------------------------------------------------------------------------------------|-----------------------------|-----------------------------|--------------------------------|
| Outcome                                                                                                  | (1)<br>$\leq 32^{+6}$ weeks | (2)<br>$\leq 26^{+6}$ weeks | (3)<br>$27^{+0}-32^{+6}$ weeks |
| Neonatal Mortality                                                                                       | 0.40<br>(0.03-4.96)         | N/A <sup>a</sup>            | 0.74<br>(0.01-36.67)           |
| Any in hospital mortality                                                                                | 0.28<br>(0.04-2.28)         | 1.18<br>(0.13-10.69)        | 0.52<br>(0.03-9.44)            |
| BPD                                                                                                      | 1.95<br>(0.48-7.84)         | 0.29<br>(0.04-2.35)         | 1.10<br>(0.16-7.79)            |
| Surgery for ROP                                                                                          | 2.23<br>(0.17-29.70)        | 1.64<br>(0.07-40.08)        | N/A <sup>a</sup>               |
| Surgery for NEC                                                                                          | 4.11<br>(0.29-58.79)        | 0.23<br>(0.00-26.25)        | N/A <sup>a</sup>               |
| PMA $>40^{+0}$ weeks                                                                                     | 0.54<br>(0.11-2.64)         | 0.40<br>(0.06-2.50)         | 0.45<br>(0.05-3.95)            |

Values are odd ratios (95% confidence interval). \*  $p < 0.05$ , \*\*  $p < 0.01$ , \*\*\*  $p < 0.001$

BPD=Bronchopulmonary Dysplasia, PMA at discharge=postmenstrual age at discharge, equal to gestational age at birth plus the length of stay in weeks. Models are adjusted for gestational age, gestational age squared, birthweight z score, use of antenatal steroids, gender, infant year of birth and deprivation.

<sup>a</sup>Too few observed outcomes in treatment group to estimate

STROBE Statement—Checklist of items that should be included in reports of *cohort studies*

|                           | Item No | Recommendation                                                                                                                                                   |
|---------------------------|---------|------------------------------------------------------------------------------------------------------------------------------------------------------------------|
| <b>Title and abstract</b> | 1       | (a) Indicate the study's design with a commonly used term in the title or the abstract<br><br><b>pages 1,4,5</b>                                                 |
|                           |         | (b) Provide in the abstract an informative and balanced summary of what was done and what was found<br><br><b>pages 4,5</b>                                      |
| <b>Introduction</b>       |         |                                                                                                                                                                  |
| Background/rationale      | 2       | Explain the scientific background and rationale for the investigation being reported<br><br><b>Pages 6,7</b>                                                     |
| Objectives                | 3       | State specific objectives, including any prespecified hypotheses<br><br><b>Pages 6,7</b>                                                                         |
| <b>Methods</b>            |         |                                                                                                                                                                  |
| Study design              | 4       | Present key elements of study design early in the paper<br><br><b>Pages 9-13</b>                                                                                 |
| Setting                   | 5       | Describe the setting, locations, and relevant dates, including periods of recruitment, exposure, follow-up, and data collection<br><br><b>Pages 7-9</b>          |
| Participants              | 6       | (a) Give the eligibility criteria, and the sources and methods of selection of participants. Describe methods of follow-up<br><br><b>Pages 7-9, 12-13</b>        |
|                           |         | (b) For matched studies, give matching criteria and number of exposed and unexposed<br><br><i>N/A not a matched study</i>                                        |
| Variables                 | 7       | Clearly define all outcomes, exposures, predictors, potential confounders, and effect modifiers. Give diagnostic criteria, if applicable<br><br><b>Pages 8,9</b> |
| Data sources/             | 8*      | For each variable of interest, give sources of data and details of methods of assessment (measurement). Describe comparability of assessment methods if there is |

1

1

|                                                                                                                            |                        |                     |                                                                                                                                                                                                   |
|----------------------------------------------------------------------------------------------------------------------------|------------------------|---------------------|---------------------------------------------------------------------------------------------------------------------------------------------------------------------------------------------------|
| 1<br>2<br>3<br>4                                                                                                           | measurement            | more than one group |                                                                                                                                                                                                   |
|                                                                                                                            |                        |                     | <b>Pages 8,9</b>                                                                                                                                                                                  |
| 5<br>6<br>7<br>8                                                                                                           | Bias                   | 9                   | Describe any efforts to address potential sources of bias                                                                                                                                         |
|                                                                                                                            |                        |                     | <b>Pages 9-13</b>                                                                                                                                                                                 |
| 9<br>10<br>11<br>12                                                                                                        | Study size             | 10                  | Explain how the study size was arrived at                                                                                                                                                         |
|                                                                                                                            |                        |                     | <b>Used whole eligible population (n=20,554)</b>                                                                                                                                                  |
| 13<br>14<br>15<br>16<br>17                                                                                                 | Quantitative variables | 11                  | Explain how quantitative variables were handled in the analyses. If applicable, describe which groupings were chosen and why                                                                      |
|                                                                                                                            |                        |                     | <b>Pages 7-13</b>                                                                                                                                                                                 |
| 18<br>19<br>20<br>21<br>22<br>23<br>24<br>25<br>26<br>27<br>28<br>29<br>30<br>31<br>32<br>33<br>34<br>35<br>36<br>37<br>38 | Statistical methods    | 12                  | (a) Describe all statistical methods, including those used to control for confounding                                                                                                             |
|                                                                                                                            |                        |                     | <b>Pages 9-13</b>                                                                                                                                                                                 |
|                                                                                                                            |                        |                     | (b) Describe any methods used to examine subgroups and interactions                                                                                                                               |
|                                                                                                                            |                        |                     | <b>Pages 12-13</b>                                                                                                                                                                                |
|                                                                                                                            |                        |                     | (c) Explain how missing data were addressed                                                                                                                                                       |
|                                                                                                                            |                        |                     | <b>Pages 12-13</b>                                                                                                                                                                                |
|                                                                                                                            |                        |                     | (d) If applicable, explain how loss to follow-up was addressed                                                                                                                                    |
|                                                                                                                            |                        |                     | N/A Cross-sectional study                                                                                                                                                                         |
|                                                                                                                            |                        |                     | (e) Describe any sensitivity analyses                                                                                                                                                             |
|                                                                                                                            |                        |                     | <b>Pages 12-13</b>                                                                                                                                                                                |
| 39                                                                                                                         | <b>Results</b>         |                     |                                                                                                                                                                                                   |
| 40<br>41<br>42<br>43<br>44<br>45<br>46<br>47<br>48<br>49<br>50<br>51<br>52<br>53<br>54                                     | Participants           | 13*                 | (a) Report numbers of individuals at each stage of study—eg numbers potentially eligible, examined for eligibility, confirmed eligible, included in the study, completing follow-up, and analysed |
|                                                                                                                            |                        |                     | <b>Pages 13-17</b>                                                                                                                                                                                |
|                                                                                                                            |                        |                     | (b) Give reasons for non-participation at each stage                                                                                                                                              |
|                                                                                                                            |                        |                     | <b>Pages 16-17</b>                                                                                                                                                                                |
|                                                                                                                            |                        |                     | (c) Consider use of a flow diagram                                                                                                                                                                |
|                                                                                                                            |                        |                     | <b>There were no non-participants, missing data are addressed in text and</b>                                                                                                                     |

2

2

|                   |     |                                                                                                                                                                                                                                                       |
|-------------------|-----|-------------------------------------------------------------------------------------------------------------------------------------------------------------------------------------------------------------------------------------------------------|
|                   |     | <b>methods</b>                                                                                                                                                                                                                                        |
| Descriptive data  | 14* | (a) Give characteristics of study participants (eg demographic, clinical, social) and information on exposures and potential confounders<br><br><b>Pages 13-15, table 1</b>                                                                           |
|                   |     | (b) Indicate number of participants with missing data for each variable of interest<br><br><b>Pages 16-17</b>                                                                                                                                         |
|                   |     | (c) Summarise follow-up time (eg, average and total amount)<br><br>N/A                                                                                                                                                                                |
| Outcome data      | 15* | Report numbers of outcome events or summary measures over time<br><br><b>Pages 13-15, table 1</b>                                                                                                                                                     |
| Main results      | 16  | (a) Give unadjusted estimates and, if applicable, confounder-adjusted estimates and their precision (eg, 95% confidence interval). Make clear which confounders were adjusted for and why they were included<br><br><b>Pages 9, 13-16, tables 1-4</b> |
|                   |     | (b) Report category boundaries when continuous variables were categorized<br><br>N/A                                                                                                                                                                  |
|                   |     | (c) If relevant, consider translating estimates of relative risk into absolute risk for a meaningful time period<br><br>N/A                                                                                                                           |
| Other analyses    | 17  | Report other analyses done—eg analyses of subgroups and interactions, and sensitivity analyses<br><br><b>Pages 13-17, tables 2,4, appendix B</b>                                                                                                      |
| <b>Discussion</b> |     |                                                                                                                                                                                                                                                       |
| Key results       | 18  | Summarise key results with reference to study objectives<br><br><b>Pages 17-22</b>                                                                                                                                                                    |
| Limitations       | 19  | Discuss limitations of the study, taking into account sources of potential bias or imprecision. Discuss both direction and magnitude of any potential bias<br><br><b>Pages 19-22</b>                                                                  |
| Interpretation    | 20  | Give a cautious overall interpretation of results considering objectives, limitations,                                                                                                                                                                |

3

3



multiplicity of analyses, results from similar studies, and other relevant evidence

**Pages 17-22**

---

|                  |    |                                                                       |
|------------------|----|-----------------------------------------------------------------------|
| Generalisability | 21 | Discuss the generalisability (external validity) of the study results |
|------------------|----|-----------------------------------------------------------------------|

**Pages 17-22**

---

**Other information**

|         |    |                                                                                                                                                               |
|---------|----|---------------------------------------------------------------------------------------------------------------------------------------------------------------|
| Funding | 22 | Give the source of funding and the role of the funders for the present study and, if applicable, for the original study on which the present article is based |
|---------|----|---------------------------------------------------------------------------------------------------------------------------------------------------------------|

**N/A no specific funding**

---

\*Give information separately for exposed and unexposed groups.

**Note:** An Explanation and Elaboration article discusses each checklist item and gives methodological background and published examples of transparent reporting. The STROBE checklist is best used in conjunction with this article (freely available on the Web sites of PLoS Medicine at <http://www.plosmedicine.org/>, Annals of Internal Medicine at <http://www.annals.org/>, and Epidemiology at <http://www.epidem.com/>). Information on the STROBE Initiative is available at <http://www.strobe-statement.org>.

4

4

# BMJ Open

## The effects of designation and volume of neonatal care on mortality and morbidity outcomes of very preterm infants in England: Retrospective population-based cohort study

|                                 |                                                                                                                                                                                                                                                                                                                                                                                                                                                                                                                                                                        |
|---------------------------------|------------------------------------------------------------------------------------------------------------------------------------------------------------------------------------------------------------------------------------------------------------------------------------------------------------------------------------------------------------------------------------------------------------------------------------------------------------------------------------------------------------------------------------------------------------------------|
| Journal:                        | <i>BMJ Open</i>                                                                                                                                                                                                                                                                                                                                                                                                                                                                                                                                                        |
| Manuscript ID:                  | bmjopen-2014-004856.R1                                                                                                                                                                                                                                                                                                                                                                                                                                                                                                                                                 |
| Article Type:                   | Research                                                                                                                                                                                                                                                                                                                                                                                                                                                                                                                                                               |
| Date Submitted by the Author:   | 15-Apr-2014                                                                                                                                                                                                                                                                                                                                                                                                                                                                                                                                                            |
| Complete List of Authors:       | Watson, Samuel; University of Warwick, Warwick Medical School; University of Warwick, Department of Economics<br>Arulampalam, Wiji; University of Warwick, Department of Economics<br>Petrou, Stavros; University of Warwick, Warwick Medical School<br>Marlow, Neil; UCL, Institute for Women's Health<br>Morgan, Andrei; UCL, Institute for Women's Health<br>Draper, Elizabeth; University of Leicester, Department of Health Sciences<br>Santhakumaran, Shalini; Imperial College, Department of Medicine<br>Modi, Neena; Imperial College, Department of Medicine |
| <b>Primary Subject Heading</b>: | Paediatrics                                                                                                                                                                                                                                                                                                                                                                                                                                                                                                                                                            |
| Secondary Subject Heading:      | Health economics, Health services research                                                                                                                                                                                                                                                                                                                                                                                                                                                                                                                             |
| Keywords:                       | Neonatal intensive care units, High-volume hospitals, Place of birth, Neonatal mortality                                                                                                                                                                                                                                                                                                                                                                                                                                                                               |
|                                 |                                                                                                                                                                                                                                                                                                                                                                                                                                                                                                                                                                        |

SCHOLARONE™  
Manuscripts

only

1  
2  
3 **The effects of designation and volume of neonatal**  
4 **care on mortality and morbidity outcomes of very**  
5 **preterm infants in England: Retrospective**  
6 **population-based cohort study**  
7  
8  
9  
10  
11  
12  
13  
14  
15  
16

17 **Watson, S. I.**, Health Economist, Warwick Medical School, University of Warwick, Coventry

18  
19  
20 **Arulampalam, W.**, Professor of Economics, Department of Economics, University of  
21  
22 Warwick, Coventry

23  
24  
25 **Petrou, S.**, Professor of Health Economics, Warwick Medical School, University of Warwick,  
26  
27 Coventry

28  
29  
30 **Marlow, N.**, Professor of Neonatal Medicine, Academic Neonatology, UCL Institute for  
31  
32 Women's Health, London

33  
34  
35 **Morgan, A.S.**, Senior Clinical Research Associate, Academic Neonatology, UCL Institute for  
36  
37 Women's Health, London

38  
39  
40 **Draper, E.S.**, Professor of Perinatal & Paediatric Epidemiology, Department of Health  
41  
42 Sciences, University of Leicester

43  
44  
45 **Santhakumaran, S.**, Statistician, Section of Neonatal Medicine, Department of Medicine,  
46  
47 Chelsea and Westminster Campus, Imperial College London, London

48  
49  
50 **Modi, N.**, Professor of Neonatal Medicine, Section of Neonatal Medicine, Department of  
51  
52 Medicine, Chelsea and Westminster Campus, Imperial College London, London

53  
54 **On behalf of the Neonatal Data Analysis Unit and the NESCOP Group**  
55  
56  
57  
58  
59  
60

1  
2  
3 *Keywords:* Neonatal intensive care units; high-volume hospitals; place of birth; neonatal  
4  
5 mortality  
6

7  
8 *Word count:* 3,497  
9

10  
11 *Corresponding author:*  
12

13 Samuel I. Watson,  
14  
15 Warwick Medical School,  
16  
17 University of Warwick,  
18  
19 Coventry,  
20  
21 CV4 7AL,  
22  
23 United Kingdom.  
24

25  
26 Tel: +44 (0) 7502 457 817.  
27

28 Email: [s.i.watson@warwick.ac.uk](mailto:s.i.watson@warwick.ac.uk)  
29  
30  
31  
32  
33  
34  
35  
36  
37  
38  
39  
40  
41  
42  
43  
44  
45  
46  
47  
48  
49  
50  
51  
52  
53  
54  
55  
56  
57  
58  
59  
60

## ABSTRACT

**Objective:** To examine the effects of designation and volume of neonatal care at the hospital of birth on mortality and morbidity outcomes in very preterm infants in a managed clinical network setting.

**Design:** A retrospective, population based analysis of operational clinical data using adjusted logistic regression and instrumental variables (IV) analyses.

**Setting:** 165 National Health Service neonatal units in England contributing data to the National Neonatal Research Database at the Neonatal Data Analysis Unit and participating in the Neonatal Economic, Staffing, and Clinical Outcomes Project.

**Participants:** 20,554 infants born at <33 weeks completed gestation (17,995 born at 27-32 weeks; 2,559 born at <27 weeks), admitted to neonatal care and either discharged or died, over the period 1<sup>st</sup> January 2009 to 31<sup>st</sup> December 2011.

**Intervention:** Tertiary designation or high volume neonatal care at the hospital of birth.

**Outcomes:** Neonatal mortality, any in-hospital mortality, surgery for necrotising enterocolitis, surgery for retinopathy of prematurity, bronchopulmonary dysplasia and postmenstrual age at discharge.

**Results:** Infants born at <33 weeks gestation and admitted to a high volume neonatal unit at the hospital of birth were at reduced odds of neonatal mortality (IV regression odds ratio [OR]: 0.70, 95% confidence interval [CI]: 0.53-0.92) and any in-hospital mortality (IV regression OR: 0.68, 95% CI: 0.54-0.85). The effect of volume on any in-hospital mortality was most acute amongst infants born at <27 weeks gestation (IV regression OR: 0.51, 95% CI: 0.33-0.79). A negative association

1  
2  
3 between tertiary-level unit designation and mortality was also observed with adjusted  
4  
5 logistic regression for infant born at <27 weeks gestation.  
6  
7

8 **Conclusions:** High volume neonatal care provided at the hospital of birth may  
9  
10 protect against in-hospital mortality in very preterm infants. Future developments of  
11  
12 neonatal services should promote delivery of very preterm infants at hospitals with  
13  
14 high volume neonatal units.  
15  
16  
17  
18  
19  
20  
21  
22  
23  
24  
25  
26  
27  
28  
29  
30  
31  
32  
33  
34  
35  
36  
37  
38  
39  
40  
41  
42  
43  
44  
45  
46  
47  
48  
49  
50  
51  
52  
53  
54  
55  
56  
57  
58  
59  
60

## ARTICLE SUMMARY

### Strengths and limitations of this study

- A national dataset consisting of the electronic patient records of a large majority of admissions to neonatal specialist care in England
- The analysis takes into account both observed and unobserved confounding
- A weakness is that the analysis is unable to disentangle the effects of the neonatal unit at the place of birth from subsequent transfers to other neonatal units

## INTRODUCTION

Intense debate has revolved around the optimal organisation of neonatal critical care services. Numerous studies have suggested that the intensity and volume of neonatal care at the hospital of birth is negatively correlated with adverse clinical outcomes, including mortality.[1–11] This has contributed to calls for centralisation of neonatal services and the closure of smaller neonatal units.[2,11,12]

Following a review by the Department of Health in 2003, perinatal centres in England were reorganised into managed clinical networks (MCN).[13] MCNs provide some of the benefits of centralisation, but also strive to maintain equity and ease of access to services by keeping lower care level and lower volume neonatal units open, with provision for transfer to higher care level or higher volume units, if required.[13] Particular emphasis is placed on the importance of transferring women at risk of extremely preterm labour to tertiary centres before delivery. Consequently, most networks aim to transfer women at high risk of delivery at <27 weeks of gestation. We have previously shown that, since the formation of MCNs, both the proportion of low gestational age infants born in hospitals with higher designation neonatal units and their transfer rate between hospitals has increased significantly; however, it remains unclear what effect this has had on clinical outcomes.[14]

Studies that have examined the effects of neonatal unit designation or volume of neonatal care provided at the hospital of birth have shown that low designation level or volume is associated with increased rates of mortality,[1–10] decreased infection rate,[7] increased severe periventricular haemorrhage,<sup>11</sup> and increased bronchopulmonary dysplasia.[7] However, these studies were almost exclusively conducted in the United States where there is greater variability in neonatal unit volume—the highest volume units in the US are typically much larger than equivalent units in England—and there are no formal arrangements for MCNs. Results from similar studies using data from the UK are limited and based on data from 1998-9, prior to the formation of MCNs.[15,16] We are not aware of any studies that



1  
2  
3 have examined infant outcomes for neonatal specialist services in MCNs in relation to unit  
4 designation or volume. In addition, organisation of neonatal care differs between countries  
5 potentially affecting the generalisability of results from these systems; for example, in  
6  
7 Germany neonatal services are markedly deregionalised whereas in Finland and Portugal  
8  
9 there is a high degree of regionalization.[17]  
10  
11

12  
13  
14 Our aim in this study was to examine the effects of designation and volume of neonatal care  
15 provided at the hospital of birth on mortality and morbidity outcomes. We assess whether  
16 organisational factors remain determinants of clinical outcomes despite the goals of neonatal  
17 reorganisation that sought to ensure that vulnerable infants are not disadvantaged by their  
18 place of birth.  
19  
20  
21  
22  
23

## 24 25 **METHODS**

### 26 27 28 **Data source and study population**

29  
30  
31 For the purpose of this empirical investigation, we extracted data from the National Neonatal  
32 Research Database (NNRD) for neonatal units participating the Neonatal Economic,  
33 Staffing, and Clinical Outcomes Project (NESCOP). The NNRD is held by the Neonatal Data  
34 Analysis Unit (NDAU), Imperial College, London, and was created from patient-level  
35 electronic records of all infants admitted to 168 of 173 neonatal units in England. Approval  
36 for data collection was obtained from the national research ethics service (reference REC  
37 10/H0803/151) as well as the Caldicott Guardians of each NHS Trust. NESCOP included  
38 165 centres providing perinatal care. On behalf of NESCOP, the MRC EPICure studies  
39 carried out the Unit Profile Survey (UPS) during 2011, comprising a survey of English  
40 hospitals that provided onsite obstetric and neonatal services. We extracted records from the  
41 NNRD of all infants born in participating centres at  $\leq 32^{+6}$  weeks<sup>+days</sup> gestation, admitted over  
42 the period 1<sup>st</sup> January 2009 to 31<sup>st</sup> December 2011, and who were discharged or died over  
43 the same period. We excluded infants who only received transitional care (n=5), which was  
44  
45  
46  
47  
48  
49  
50  
51  
52  
53  
54  
55  
56  
57  
58  
59  
60

1  
2  
3 defined according to English Department of Health's Healthcare Resource Group (HRG4)  
4 code "XA04Z".[18] Gestational age was determined by ultrasound scan.  
5  
6  
7

## 8 9 **Outcomes**

10  
11 We derived the following outcomes from the extracted data for use in the analyses: 28-day  
12 (neonatal) mortality, any in-hospital mortality, surgery for necrotising enterocolitis (NEC),  
13 treatment for retinopathy of prematurity (ROP), and bronchopulmonary dysplasia (BPD). We  
14 defined BPD as the requirement of supplementary oxygen for at least 28 days and at 36  
15 weeks postmenstrual age (PMA).[19] We also examined PMA at discharge as a marker of  
16 length of stay; this was defined as the gestational age at birth plus the length of stay at final  
17 discharge from any neonatal unit or death. We defined the outcome to be one if the PMA at  
18 discharge was greater than 40 weeks and zero otherwise.  
19  
20  
21  
22  
23  
24  
25  
26  
27

## 28 29 **Covariates**

30  
31 To determine appropriate covariates, we reviewed previous prediction models for very  
32 preterm infants[20] and selected variables that a) were significant predictors of adverse  
33 sequelae, b) were available in our dataset and of high quality, and c) not confounded by the  
34 provision of neonatal care. The variables we included were: gestational age at birth,  
35 gestational age squared, birth weight z-score (birth weight standardised by gestational age  
36 week), and the following indicators: whether the mother received a full or partial course of  
37 antenatal steroids, sex, infant year of birth, and whether or not the mother came from an  
38 area within the lowest decile of the Index of Multiple Deprivation 2007 score.[21]  
39  
40  
41  
42  
43  
44  
45  
46  
47  
48

## 49 50 **Statistical methods**

51  
52 We conducted two separate sets of analyses based on whether or not infants were admitted  
53 to a neonatal unit at the hospital of birth designated as: (i) a tertiary centre,[22] or (ii) high  
54 volume. For the latter, we defined volume according to the annual number of care days at  
55 any level of care provided to very preterm infants ( $\leq 32^{+6}$  weeks gestation). A 'high volume'  
56  
57  
58  
59  
60

1  
2  
3 unit was defined as one whose volume was in the top quartile of all neonatal units in the  
4 sample. 'High volume' was determined by quartile rather than an absolute care day  
5 threshold to facilitate comparison with other measures of volume in the sensitivity analyses.  
6  
7 A previous study that examined organisational characteristics of neonatal units also  
8 categorised volume using quartiles.[17] Dichotomising by upper quartile divided the infants  
9 between high and low volume units in approximately the same proportion as between tertiary  
10 and non-tertiary level units. To aid comparison with other studies, in particular from the US,  
11 and as a robustness check, 'high volume' was also defined as 100 very low birth-weight  
12 (VLBW; <1,500g) admissions of infants born in the same hospital per annum.  
13  
14  
15  
16  
17  
18  
19  
20  
21

22 We first conducted an unadjusted comparison of clinical characteristics and outcomes of  
23 infants by unit characteristics. Secondly, we estimated an adjusted model, and thirdly, we  
24 conducted an adjusted comparison using an instrumental variables methodology to account  
25 for unobserved confounding. In the absence of a randomised control trial, instrumental  
26 variables methodology acts as an *ex post* randomisation and enables us to estimate the  
27 'causal effects' of designation and volume of neonatal care provided at the hospital of birth.  
28 The methodology involves the use of a variable, called an "instrument", which, in this  
29 context, needs to fulfil two criteria: 1) it should be strongly correlated with the characteristics  
30 of the neonatal unit at the hospital of birth; and 2) it should be uncorrelated with the  
31 outcomes of interest conditional on observed covariates and therefore uncorrelated with  
32 unobserved confounders.  
33  
34  
35  
36  
37  
38  
39  
40  
41  
42  
43  
44

45 For the instruments, we used indicators for the designated level of care of the nearest  
46 neonatal unit to the mother's residence, an indicator for whether it had surgical facilities, an  
47 indicator for whether it was high volume, the distance to the nearest neonatal unit, and the  
48 interactions of either the level of care indicators or high volume indicator with distance, giving  
49 nine instruments in total. Straight line distance was calculated from the population weighted  
50 centre of the mother's Lower Super Output Area to each hospital.[23]  
51  
52  
53  
54  
55  
56  
57  
58  
59  
60

1  
2  
3 These instrumental variables fulfil condition (1) if infants are more likely to be born in the  
4 hospital closest to the mother's residence. They will also fulfil condition (2) if the location of  
5 the mother's residence is uncorrelated with an infant's unobserved clinical risk. We tested for  
6 a difference in observed characteristics by level and volume of the nearest neonatal unit.  
7 However, tertiary level and high volume units are more likely to be in urban areas that are  
8 socioeconomically deprived so we may expect to see more preterm and low birth weight  
9 infants being born in these areas.[24] We therefore also controlled for local deprivation when  
10 testing for a difference in means by nearest neonatal unit characteristics by estimating a  
11 linear regression of the observed variable of interest on the nearest neonatal unit  
12 characteristic and deprivation indicator, and using an F-test to test the coefficient on the  
13 nearest neonatal unit characteristic variable.

14  
15  
16  
17  
18  
19  
20  
21  
22  
23  
24  
25  
26 As the outcomes are all binary logistic regression was used. In order to employ instrumental  
27 variables estimation in this framework, two stage residual inclusion (2SRI) was used.[25]  
28 The 2SRI method is explained in online Appendix A. The standard errors were adjusted for  
29 clustering within units.

30  
31  
32  
33  
34  
35 Our baseline analyses examined infants born at  $\leq 32^{+6}$  weeks gestation. We then conducted  
36 analyses on subsets of infants born at  $\leq 26^{+6}$  weeks gestation or at  $27^{+0}$ - $32^{+6}$  weeks  
37 gestation;  $\leq 26^{+6}$  weeks gestation is the cut-off used by perinatal networks for prioritising  
38 inter-unit transfers. 'Statistical significance', where discussed, refers to a 5% significance  
39 level in all cases.

#### 40 41 42 43 44 45 46 **Missing data and sensitivity analyses**

47  
48  
49 Infants with missing outcomes data were excluded from the analyses, whilst those with  
50 missing covariate data were assigned a zero in the case of binary indicators. There were no  
51 infants with missing continuous covariates. We excluded all infants with any missing data as  
52 a further sensitivity analysis.

1  
2  
3 Separate sensitivity analyses, using our preferred method of instrumental variables logistic  
4 regression, also explored the effects of: (i) including unit random effects in the statistical  
5 models; (ii) removing infants who died from analyses of the morbidity and PMA at discharge  
6 outcomes and defining a new outcome of any in-hospital mortality and/or BPD to account for  
7 possible bias caused by infants dying prior to experiencing the morbidity outcome; (iii)  
8 redefining high volume as the top 25% of units in terms of intensive care days provided to  
9  $\leq 32^{+6}$  gestational week infants; (iv) redefining high volume as the top 25% of units in terms of  
10 number of  $\leq 32^{+6}$  gestational week infants cared for; and (v) redefining high volume as at  
11 least 100 VLBW infants born in and admitted to the neonatal unit in the hospital per annum.  
12  
13  
14  
15  
16  
17  
18  
19  
20  
21

22 All analyses were carried out with R 2.14.2 and Stata 11.  
23  
24

## 25 RESULTS

26  
27

28 In total, data for 20,554 infants born at  $\leq 32^{+6}$  weeks gestation over the study period and  
29 admitted to a neonatal unit at the hospital of birth were extracted from the NNRD, 2,559 of  
30 whom were born at  $\leq 26^{+6}$  weeks gestation. Table 1 provides descriptive statistics of the  
31 samples analysed.  
32  
33  
34  
35  
36

37 In the sample, 9,466 (46.1%) infants were born in hospitals with a tertiary level neonatal unit  
38 and 9,541 (46.4%) were born in hospitals with a high volume neonatal unit. The cut-off for  
39 high volume was approximately 3,480 annual care days for infants born at  $\leq 32^{+6}$  weeks  
40 gestation in each hospital. The total sample of 20,554 infants were born in 165 different  
41 hospitals, 44 (26.7%) of which had level three neonatal units, 81 (49.0%) level two neonatal  
42 units, and 39 (23.6%) level one neonatal units. There were 39 (23.6%) neonatal units  
43 classified as high volume, 30 (78.0%) of which were designated level three units;  
44 consequently, 14 of the 44 (31.8%) level three designated units were not classified as high  
45 volume. Among the 20,554 infants, 1,892 (9.2%) were born in hospitals with neonatal units  
46 that were classified as high volume but not tertiary level and 1,817 (8.8%) were born in  
47 hospitals with neonatal units classified as tertiary level but not high volume.  
48  
49  
50  
51  
52  
53  
54  
55  
56  
57  
58  
59  
60

### 'Standard' adjusted results

Table 2 presents the estimated adjusted odds ratios associated with admission to either tertiary or high volume neonatal care at the hospital of birth.

The standard logistic regressions did not reveal a statistically significant difference in the odds of mortality for very preterm infants admitted to tertiary level care at the hospital of birth compared to their counterparts admitted to non-tertiary level care. However, when considering only infants born at  $\leq 26^{+6}$  weeks gestation, we found a reduction in the odds of neonatal mortality (OR: 0.65, 95% CI: 0.46-0.91,  $p=0.012$ ), but not any in-hospital mortality.

For infants admitted to a high volume neonatal unit at the hospital of birth, a reduced odds of neonatal mortality was observed for those born at  $\leq 32^{+6}$  weeks gestation (OR: 0.73, 95% CI: 0.56-0.95,  $p=0.018$ ) and at  $\leq 26^{+6}$  weeks gestation (OR: 0.62, 95% CI: 0.44-0.87,  $p=0.006$ ), but this was not replicated for infants born at  $27^{+0}$ - $32^{+6}$  weeks gestation. Those infants born at  $\leq 26^{+6}$  weeks gestation were also at reduced odds of any in-hospital mortality (0.71, 95% CI: 0.52-0.97,  $p=0.033$ ) and increased odds of BPD (OR: 1.59, 95% CI: 1.18-2.14,  $p=0.002$ ) compared to their counterparts admitted to a non-high volume neonatal unit at the hospital of birth. There were no other statistically significant differences observed for the morbidity outcomes.

### Instrument validity

The instruments were strongly correlated with the characteristics of the unit at the hospital of birth; 88.4% of infants whose nearest neonatal unit was designated level three were born in a hospital with a level three unit compared to only 22.5% of infants whose nearest neonatal unit was not designated level three. Table 3 shows descriptive statistics for the 20,554 very preterm infants by the designation and volume of the neonatal unit nearest to the mother's place of residence. After correcting for deprivation, there were no statistically significant differences in the observed covariates.

### Instrumental variables logistic regression

Table 4 shows the estimated odds ratios using the instrumental variables logistic regressions. We found no significant differences in neonatal mortality between infants admitted to either tertiary or non-tertiary neonatal care at the hospital of birth. We did find an increased odds of treatment for ROP for very preterm infants born at 27<sup>+0</sup>-32<sup>+6</sup> weeks gestation born in a hospital with a tertiary level unit (OR: 2.17, 95% CI: 1.06-4.47, p=0.035).

In contrast to the effect of tertiary level care, admission to a high volume neonatal unit at the hospital of birth significantly reduced the odds of neonatal mortality (OR: 0.70, 95% CI: 0.53-0.92, p=0.011) and any in-hospital mortality (OR: 0.68, 95% CI: 0.54-0.85, p=0.001) in very preterm infants. These effects were most acute amongst infants born at  $\leq 26^{+6}$  weeks gestation. In terms of morbidity, the only significant effect was found for BPD (OR: 1.78, 95% CI: 1.12-2.81, p=0.014) for infants born at  $\leq 26^{+6}$  weeks gestation and admitted to high volume neonatal care at the hospital of birth.

### Sensitivity Analyses

The results from the sensitivity analyses are presented in Appendix B. There were 1,172 (5.7%) infants with missing data for antenatal steroids; there were no missing values for the other covariates. The results remained qualitatively similar when all infants with any missing data were excluded from the analyses (table B1).

The results remained robust to the inclusion of unit level random effects. We further excluded infants who died from the analyses of morbidity outcomes. This did not reveal any evidence of differences in the odds ratios except for the odds of treatment for ROP for infants admitted to tertiary level care at the hospital of birth (OR: 1.96, 95% CI: 1.15-3.32, p=0.013) (table B2). No evidence of an effect for the outcome defined as any in-hospital mortality and/or BPD was observed (table B2). Three alternative measures of volume were also used. In these sensitivity analyses, the odds of any in-hospital mortality remained significantly lower for very preterm infants admitted to a high volume unit at the hospital of

1  
2  
3 birth (table B3 and B4). Only eight hospitals (4.8%) met the criteria of at least 100 VLBW  
4 infants per annum in any of the study years so that only a small proportion (6.5%) of the  
5 sample was inborn and admitted to these units. There is therefore imprecision around these  
6 results with wide confidence intervals; amongst these infants, the odds of any in-hospital  
7 mortality was significantly lower but not statistically significant (table B4).  
8  
9  
10  
11  
12

## 13 DISCUSSION

14  
15  
16  
17 We examined the effects of designation and volume of neonatal care provided at the hospital  
18 of birth on mortality and morbidity outcomes for very preterm infants in England. Our key  
19 finding was a consistent reduction in the odds of mortality for very preterm infants admitted  
20 to high volume neonatal units. We examined infants born at  $\leq 26^{+6}$  weeks gestation and  
21 those born at  $27^{+6}$ - $32^{+6}$  weeks gestation separately to reflect transfer policies and found a  
22 statistically significant reduction in the odds of mortality in the former group only.  
23  
24  
25  
26  
27  
28

29 Furthermore, we found differences in the odds of mortality outcomes between standard  
30 logistic regressions and our preferred instrumental variables approach. The standard logistic  
31 regressions were generally found to under-estimate the beneficial effects of high volume  
32 care on mortality outcomes. This was expected given the aim of MCNs to transfer high risk  
33 infants to high volume and designation units. With regards to morbidity outcomes, treatment  
34 for ROP was the only morbidity for which a statistically significant effect was observed  
35 across analyses. We found that infants born at  $27^{+6}$ - $32^{+6}$  weeks gestation in hospitals with  
36 tertiary level units were at increased odds of receiving treatment for ROP; however, only a  
37 very small number of these infants received treatment for ROP (86/17,995; 0.5%),  
38 suggesting the observed difference may not be clinically significant.  
39  
40  
41  
42  
43  
44  
45  
46  
47  
48  
49

50 Our preferred instrumental variables methodology, in the absence of a randomised  
51 assignment of infants to units, enabled us to estimate the causal effects of designation and  
52 volume of neonatal care provided at the hospital of birth using observational data. This  
53 approach has been widely applied in other healthcare evaluations.[26] However, we can only  
54  
55  
56  
57  
58  
59  
60



1  
2  
3 identify one previous application of this methodology to the evaluation of perinatal  
4  
5 outcomes.[7] Our findings agree with the findings of an US-based study that examined the  
6  
7 separate effects of level and volume of neonatal care.[4] We also found a reduction in the  
8  
9 odds of mortality when analysing the annual number of VLBW admissions of inborn infants—  
10  
11 a measure frequently used in US studies of this nature.[2]  
12

13  
14 We acknowledge limitations to our study. First, instrumental variables methodology only  
15  
16 identifies the effect of an intervention or treatment for those individuals whose assignment to  
17  
18 treatment is altered by the instrumental variable.[27] We do not know the effects for infants  
19  
20 who would always be born in hospitals with a high level or volume neonatal unit despite the  
21  
22 location of the mother's residence (see online Appendix A). Nevertheless, we demonstrated  
23  
24 the validity of our instruments in meeting the required assumptions. Importantly, the  
25  
26 assumptions required for an instrumental variables methodology are weaker than those  
27  
28 required to support a "standard" analysis, which requires that infants are randomly assigned  
29  
30 to hospitals of birth; otherwise the estimated odds ratios will be biased. Second, due to data  
31  
32 limitations we cannot control for the effects of care and risk of death in the delivery suite at  
33  
34 the hospital of birth. However, high volume delivery units have been shown to be associated  
35  
36 with a reduced risk of neonatal mortality.[28,29] Since high volume delivery units are often  
37  
38 found in hospitals with high volume neonatal care this would lead us to suspect that our  
39  
40 analyses underestimate the benefits of birth in hospitals with high volume neonatal care.  
41

42  
43 Third, we are unable to disentangle the effects of the unit at the place of birth and  
44  
45 subsequent transfers on final outcomes. We therefore cannot assess whether increasing the  
46  
47 provision of transfers attenuates the increased odds of mortality associated with birth in  
48  
49 hospitals without high volume neonatal care. While identification of acute neonatal transfers  
50  
51 was possible from our data, identifying the effects of transfer on outcomes presents a  
52  
53 number of difficult statistical issues. However, we expect that, if transfers to high volume  
54  
55 units reduce the odds of mortality, our effects presented in this paper underestimate the  
56  
57 benefit of birth in a hospital with high level or volume neonatal care (see Appendix A for an  
58  
59  
60

1  
2  
3 extended discussion), although neonatal transport itself may have negative effects on infant  
4 health outcomes.[30,31] A final limitation is that a small number of neonatal units in England  
5 (n=8) across MCNs do not contribute data to the NNRD and/or participate in NESOP. The  
6 effect of also including data from these units on outcomes remains a topic for future enquiry.  
7  
8  
9

10  
11  
12 An intervention that increases the proportion of very preterm infants born in hospitals with  
13 high volume neonatal units may involve increasing the proportion of in-utero transfers.  
14 Transfers of women prior to delivery are generally preferable because they are believed to  
15 be both safer and less expensive than postnatal transfers of vulnerable infants.[32] However,  
16 a study in 2009 showed that almost one half of all in-utero transfer requests to the London  
17 Ambulance Service were unsuccessful for non-clinical reasons.[33] Furthermore, studies  
18 from other countries, including Portugal, Finland, and the United States, have shown that in  
19 more regionalised systems as many as 90-95% of very preterm or very low birth weight  
20 infants are born in hospitals with tertiary designation neonatal units.[10,34,35] The effects of  
21 transfers within different organisational structures for neonatal care remains an important  
22 area for future research especially as the new English Operational Delivery Networks will  
23 supersede the perinatal MCNs as part of the changes following the Health and Social Care  
24 Act (2012).[36]  
25  
26  
27  
28  
29  
30  
31  
32  
33  
34  
35  
36  
37  
38  
39

40 In conclusion, instrumental variables methodology did not reveal evidence of a difference in  
41 mortality outcomes between very preterm infants admitted to either tertiary or non-tertiary  
42 neonatal care at the hospital of birth. However, we do provide evidence of reduced odds of  
43 mortality for very preterm infants admitted to high volume neonatal units at delivery  
44 hospitals. The effect of volume on neonatal outcomes is an important consideration for policy  
45 makers deciding the optimal organisation of neonatal specialist services.  
46  
47  
48  
49  
50  
51  
52  
53  
54  
55  
56  
57  
58  
59  
60

## Acknowledgements

We thank Nicola Fitz-Simon for invaluable advice on statistical issues and Eugene Statnikov and Daniel Gray for assistance with the data. We thank the staff from neonatal units involved in capturing electronic data and Richard Colquhoun, Neonatal Data Analysis Unit manager, and Surbhi Shah for administrative support. We would also like to thank Andy Cole, Kate Bennett, Helen Kirrane, and the Steering Board of the Neonatal Data Analysis Unit.

We would also like to thank the following contributing neonatal units and clinical leads (all units were included in the NESOP survey and offered an "opt out" of service evaluation that made use of NNRD data):

Matthew Babirecki, Airedale General Hospital; Andrew Gallagher, Alexandra Hospital; D Manning, Arrowe Park Hospital; Tim Wickham, Barnet Hospital; MA Saeed, Barnsley District General Hospital; Nawfal Sharief, Basildon Hospital; Ruth Wigfield, Basingstoke & North Hampshire Hospital; Nigel Brooke, Bassetlaw District General Hospital; Raghavan Kadalraja, Bedford Hospital; Julie Nycyk, Birmingham City Hospital; Mike Watkinson, Birmingham Heartlands Hospital; Imogen Morgan, Birmingham Women's Hospital; Sam Oddie, Bradford Royal Infirmary; R.N Mahesh Babu, Broomfield Hospital; Eleri Crosbie, Calderdale Royal Hospital; Tim Wickham, Chase Farm Hospital; Gary Hartnoll, Chelsea & Westminster Hospital; Aiwyne Foo, Chesterfield Royal Hospital; Sarah Dalton, Colchester General Hospital; Graham Whincup, Conquest Hospital; Stephen Brearey, Countess of Chester Hospital; John Chang, Croydon University Hospital (Mayday); Mahfud Ben-Hamida, Cumberland Infirmary; Abdul Hasib, Darent Valley Hospital; S Subramania Krish Namoorthy, Darlington Memorial Hospital; Julian Larson, Derriford Hospital; Kallinath Shyamannr, Dewsbury & District Hospital; Pauline Adiotomre, Diana Princess of Wales Hospital; Nigel Brooke, Doncaster Royal Infirmary; Phil Wylie, Dorset County Hospital; Vivien Chan, Ealing Hospital; K Aboul Khader, East Surrey Hospital; Graham Whincup, Eastbourne District General Hospital; Ruth Shephard, Epsom General Hospital; Sri Nagesh

1  
2  
3 Panasa, Fairfield general; JP Wyllie, Friarage Hospital; Abdus Mallik, Frimley Park Hospital;  
4  
5 Owen Galt, Furness General Hospital; R C de Boer, George Eliot Hospital; Jennifer  
6  
7 Holman, Gloucestershire Royal Hospital; Mike Watkinson, Good Hope Hospital; Stanley  
8  
9 Zengeya, Great Western Hospital; Morag Campbell, Guy's & St Thomas' Hospital; D Gillies,  
10  
11 Harrogate District Hospital; Andrew Butterfill, Hereford County Hospital; Michele Cruwys,  
12  
13 Hillingdon Hospital; Hilary Dixon, Hinchingsbrooke Hospital; Kate Costeloe, Homerton  
14  
15 Hospital; Eleri Adams, Horton Hospital; Chris Wood, Hull Royal Infirmary; Matthew James,  
16  
17 Ipswich Hospital; JP Wyllie, James Cook University Hospital; Vasantha Jayalal, James  
18  
19 Paget Hospital; Eleri Adams, John Radcliffe Hospital; Pratibha Rao, Kettering General  
20  
21 Hospital; B K Sharma, King George Hospital; Abhi Gkeenga, King's College Hospital; Vibert  
22  
23 Noble, King's Mill Hospital; Dwight Lindo, Kingston Hospital; Meera Lama, Lancashire  
24  
25 Women and Newborn Centre; Lawrence Miall, Leeds Neonatal Service; Andrew Currie,  
26  
27 Leicester General Hospital; Andrew Currie, Leicester Royal Infirmary; A Thirumurugan, L  
28  
29 eighton Hospital; Sudhakar Rao, Lincoln County Hospital; Andy Raffles, Lister Hospital; CW  
30  
31 Yoxall, Liverpool Women's Hospital; P Sivakumar, Luton & Dunstable Hospital; Ignatios  
32  
33 Losa, Macclesfield District General Hospital; Hamudi Kisat, Maidstone; B Jan Muhamad,  
34  
35 Manor Hospital; Aung Soe, Medway Maritime Hospital; Jasper Katumba, Milton Keynes  
36  
37 Foundation Trust Hospital; Babu Kumararatne, New Cross Hospital; Vimala Gopinathan,  
38  
39 Newham General Hospital; Mark Dyke, Norfolk & Norwich University Hospital; Yonas  
40  
41 Cherinet, North Devon District Hospital; Sri Nagesh Panasa, North Manchester General  
42  
43 Hospital; Lesley Alsford, North Middlesex University Hospital; Fiona Thompson,  
44  
45 Northampton General Hospital; Paul Mannx, Northwick Park Hospital; Stephen Wardle,  
46  
47 Nottingham City Hospital; Stephen Wardle, Nottingham University Hospital; Tim McBride,  
48  
49 Ormskirk District General Hospital; Seif Babiker, Peterborough City Hospital; Sudhakar Rao,  
50  
51 Pilgrim Hospital; Minesh Khashu, Poole Hospital NHS Foundation Trust; Than Soe, Princess  
52  
53 Alexandra Hospital; Mike Hall, Princess Anne Hospital; Philip Amess, Princess Royal  
54  
55 Hospital; Shaun Walter, Princess Royal University Hospital; Andy Raffles, Queen Elizabeth II  
56  
57 Hospital; CR Groves, Queen Alexandra Hospital; Lidia Tyszczyk, Queen Charlotte's  
58  
59  
60

1  
2  
3 Hospital; Susan Rubin, Queen Elizabeth Hospital; Shaun Walter, Queen Elizabeth Hospital;  
4  
5 Dennis Bosman, Queen Elizabeth Hospital (Gateshead); David Long, Queen Elizabeth the  
6  
7 Queen Mother Hospital; Azhar Manzoor, Queen's Hospital; B K Sharma, Queen's Hospital;  
8  
9 Amanda Ogilvy-Stuart, Rosie Maternity Hospital; Christine Harrison, Rotherham District  
10  
11 General Hospital; Vibha Sharma, Royal Albert Edward Infirmary; GJ Boson, Royal Berkshire  
12  
13 Hospital; M Yadan, Royal Bolton Hospital; Paul Munyard, Royal Cornwall Hospital; John  
14  
15 McIntyre, Royal Derby Hospital; Vaughan Lewis, Royal Devon & Exeter Hospital; D  
16  
17 Schapira, Royal Hampshire County Hospital; Owen Galt, Royal Lancaster Infirmary;  
18  
19 Natasha Maddock, Royal Oldham Hospital; Richa Gupta, Royal Preston Hospital; Alison  
20  
21 Moore, Royal Shrewsbury Hospital; Charles Godden, Royal Surrey County Hospital; Philip  
22  
23 Amess, Royal Sussex County Hospital; Steve Jones, Royal United Hospital; Alan Fenton,  
24  
25 Royal Victoria Infirmary; Anande Mohite, Russells Hall Hospital; Jonathan Moise, Salford  
26  
27 Royal; Shirley Kinsey, Salisbury District Hospital; Mazen Qunibi, Scarborough General  
28  
29 Hospital; Pauline Adiotomre, Scunthorpe General Hospital; Rob Bolton, South Tyneside  
30  
31 District Hospital; Arfa Khan, Southend Hospital; Richard Wach, Southmead Hospital; Sandra  
32  
33 Calvert, St George's Hospital; Ruth Shephard, St Helier Hospital; Anthony Emmerson, St  
34  
35 Mary's Hospital; Peter Chow, St Mary's Hospital; Sian Butterworth, St Mary's Hospital;  
36  
37 James Tooley, St Michael's Hospital; Peter Reynolds, St Peter's Hospital; Avril Garg, St  
38  
39 Richard's Hospital; KK Tewary, Staffordshire General Hospital; Carrie Heal, Stepping Hill  
40  
41 Hospital; Gail Whitehead, Stoke Mandeville Hospital; Majd Abu-Hard, Sunderland Royal  
42  
43 Hospital; Jacqueline Birch, Tameside General Hospital; Rebecca Mann, Taunton &  
44  
45 Somerset Hospital; Elizabeth Pilling, The Jessop Wing; Vivienne van Someren, The Royal  
46  
47 Free Hospital; Rainer Ebel, The Royal London Hospital; Stefan Schulee, Torbay Hospital;  
48  
49 Hamudi Kisat, Tunbridge Wells Hospital; Mark Sellwood, University College Hospital; Kate  
50  
51 Blake, University Hospital Coventry; Jauro Kuna, University Hospital Lewisham; S  
52  
53 Subramania Krish Namoorthy, University Hospital of North Durham; Kate Palmer, University  
54  
55 Hospital of North Staffordshire; Ian Verber, University Hospital of North Tees; Faisal Al-  
56  
57 Zidgali, University Hospital of South Manchester; AJ Rowlands, Victoria Hospital; Joan  
58  
59  
60

1  
2  
3 Oliver, Wansbeck General Hospital; Delyth Webb, Warrington Hospital; R B Acharya,  
4 Warwick Hospital; Chaniyil A Ramesh, Watford General Hospital; Mahfud Ben-Hamida, West  
5 Cumberland Hospital; Hashir Ariff, West Middlesex University Hospital; Ian Evans, West  
6 Suffolk Hospital; Rekha Sanghavi, Wexham Park Hospital; Caroline Sullivan, Whipps Cross  
7 University Hospital; Laweh Amegavie, Whiston Hospital; ER Broadhurd, Whittington  
8 Hospital; David Long, William Harvey Hospital; Andrew Gallagher, Worcestershire Royal  
9 Hospital; Anil Garg, Worthing Hospital; Megan Eaton, Yeovil District Hospital; Guy Millman,  
10 York District Hospital.  
11  
12  
13  
14  
15  
16  
17  
18  
19

### 20 **Contributors:**

21  
22  
23 SW conceived the study; SW, WA, and SP contributed to developing the econometric  
24 methodology for the study; SW prepared the data for analysis; SW, WA, SP, NMa, AM, ED,  
25 and NMo contributed to covariate selection and interpretation of the results; SS managed the  
26 extraction and cleaning of NNRD variables; SW prepared the first draft of the paper; this and  
27 all subsequent drafts were reviewed and revised by all authors; all authors approved the final  
28 version submitted.  
29  
30  
31  
32  
33  
34  
35

### 36 **Funding:**

37  
38  
39 The Neonatal Data Analysis Unit is supported in part by a Programme Grant for Applied  
40 Research (RP-PG-0707-10010) from the National Institute of Health Research (NIHR) and  
41 unrestricted funding from the Department of Health, Danone, AbbVie, and Abbott  
42 International. SW receives funding from Bliss and the Department of Economics, University  
43 of Warwick. NMa receives part funding from the Department of Health's NIHR Biomedical  
44 Research Centre's funding scheme at UCLH/UCL. Bliss also provides funding for the  
45 NESOP group. The study funders had no role in study design, collection, analysis, and  
46 interpretation of data, writing of the report, or in the decision to submit the article for  
47 publication.  
48  
49  
50  
51  
52  
53  
54  
55  
56  
57  
58  
59  
60

**Competing interests:**

None declared.

**Ethical approval:**

This study was carried out with the National Neonatal Research Database (REC 10/H0803/151) as part of NESCOP undertaken with permission from NHS Trust Caldicott Guardian.

**Data Sharing Statement:**

No additional data available. Statistical code is available from the corresponding author.

## References

- 1 Lasswell SM, Barfield WD, Rochat RW, *et al.* Perinatal regionalization for very low-birth-weight and very preterm infants: a meta-analysis. *JAMA: the journal of the American Medical Association* 2010;**304**:992–1000.
- 2 Phibbs CS, Baker LC, Caughey AB, *et al.* Level and volume of neonatal intensive care and mortality in very-low-birth-weight infants. *The New England journal of medicine* 2007;**356**:2165–75.
- 3 Cifuentes J, Bronstein J, Phibbs CS, *et al.* Mortality in Low Birth Weight Infants According to Level of Neonatal Care at Hospital of Birth. *Pediatrics* 2002;**109**:745–51.
- 4 Chung JH, Phibbs CS, Boscardin WJ, *et al.* The effect of neonatal intensive care level and hospital volume on mortality of very low birth weight infants. *Medical care* 2010;**48**:635–44.
- 5 Rogowski J a, Horbar JD, Staiger DO, *et al.* Indirect vs direct hospital quality indicators for very low-birth-weight infants. *JAMA: the journal of the American Medical Association* 2004;**291**:202–9.
- 6 Bartels DB, Wypij D, Wenzlaff P, *et al.* Hospital volume and neonatal mortality among very low birth weight infants. *Pediatrics* 2006;**117**:2206–14.
- 7 Lorch S a, Baiocchi M, Ahlberg CE, *et al.* The differential impact of delivery hospital on the outcomes of premature infants. *Pediatrics* 2012;**130**:270–8.
- 8 Fellman V, Hellström-Westas L, Norman M, *et al.* One-year survival of extremely preterm infants after active perinatal care in Sweden. *JAMA: the journal of the American Medical Association* 2009;**301**:2225–33.
- 9 Johansson S, Montgomery SM, Ekblom A, *et al.* Preterm delivery, level of care, and infant death in sweden: a population-based study. *Pediatrics* 2004;**113**:1230–5.



- 1  
2  
3 10 Rautava L, Lehtonen L, Peltola M, *et al.* The effect of birth in secondary- or tertiary-  
4 level hospitals in Finland on mortality in very preterm infants: a birth-register study.  
5  
6 *Pediatrics* 2007;**119**:e257–63.  
7  
8  
9  
10 11 Synnes AR, Macnab YC, Qiu Z, *et al.* Neonatal intensive care unit characteristics  
11 affect the incidence of severe intraventricular hemorrhage. *Medical care*  
12  
13 2006;**44**:754–9.  
14  
15  
16 12 Phibbs CS. Managed clinical networks in neonatal care. *BMJ* 2012;**344**:e2423–e2423.  
17  
18  
19 13 Department of Health. Report of Department of Health Working Group on Neonatal  
20 Intensive Care Services. London: 2003.  
21  
22  
23 14 Gale C, Santhakumaran S, Nagarajan S, *et al.* Impact of managed clinical networks  
24 on NHS specialist neonatal services in England: population based study. *Bmj*  
25  
26 2012;**344**:e2105–e2105.  
27  
28  
29 15 Tucker J. Patient volume, staffing, and workload in relation to risk-adjusted outcomes  
30 in a random stratified sample of UK neonatal intensive care units: a prospective  
31  
32 evaluation. *Lancet* 2002;**359**:99–107.  
33  
34  
35  
36 16 Hamilton KESC, Redshaw ME, Tarnow-Mordi W. Nurse staffing in relation to risk-  
37 adjusted mortality in neonatal care. *Archives of disease in childhood Fetal and*  
38  
39 *neonatal edition* 2007;**92**:F99–F103.  
40  
41  
42 17 Van Reempts P, Gortner L, Milligan D, *et al.* Characteristics of neonatal units that  
43 care for very preterm infants in Europe: results from the MOSAIC study. *Pediatrics*  
44  
45 2007;**120**:e815–25.  
46  
47  
48  
49 18 Department of Health. Reforming NHS financial flows: Introducing Payment by  
50 Results. London: 2002.  
51  
52  
53  
54 19 Ehrenkranz RA, Walsh MC, Vohr BR, *et al.* Validation of the National Institutes of  
55 Health consensus definition of bronchopulmonary dysplasia. *Pediatrics*  
56  
57 2005;**116**:1353–60.  
58  
59  
60

- 1  
2  
3 20 Medlock S, Ravelli ACJ, Tamminga P, *et al.* Prediction of mortality in very premature  
4 infants: a systematic review of prediction models. *PloS one* 2011;**6**:e23441.  
5  
6  
7 21 Noble M, McLennan D, Wilkinson K, *et al.* The English indices of deprivation 2007.  
8 2007.  
9  
10  
11 22 British Association of Perinatal Medicine. Categories of Care 2011. Categories of  
12 Care 2011.  
13 2011.[http://www.bapm.org/publications/documents/guidelines/CatsofcarereportAug11.](http://www.bapm.org/publications/documents/guidelines/CatsofcarereportAug11.pdf)  
14 pdf (accessed 12 Jun2012).  
15  
16  
17  
18  
19  
20 23 Office for National Statistics. Super Output Areas.  
21 2011.[http://www.ons.gov.uk/ons/guide-method/geography/beginner-s-](http://www.ons.gov.uk/ons/guide-method/geography/beginner-s-guide/census/super-output-areas--soas-/index.html)  
22 guide/census/super-output-areas--soas-/index.html (accessed 12 Feb 2013).  
23  
24  
25  
26  
27 24 Smith LK, Draper ES, Manktelow BN, *et al.* Socioeconomic inequalities in very  
28 preterm birth rates. *Archives of disease in childhood Fetal and neonatal edition*  
29 2007;**92**:F11–4.  
30  
31  
32  
33 25 Terza J V, Basu A, Rathouz PJ. Two-stage residual inclusion estimation: addressing  
34 endogeneity in health econometric modeling. *Journal of health economics*  
35 2008;**27**:531–43.  
36  
37  
38  
39  
40 26 Tsai AC, Votruba M, Bridges JFP, *et al.* Overcoming bias in estimating the volume-  
41 outcome relationship. *Health services research* 2006;**41**:252–64.  
42  
43  
44 27 Imbens G, Angrist J. Identification and estimation of local average treatment effects.  
45 *Econometrica: Journal of the Econometric Society* 1994;**62**:467–75.  
46  
47  
48  
49 28 Heller G, Richardson DK, Schnell R, *et al.* Are we regionalized enough? Early-  
50 neonatal deaths in low-risk births by the size of delivery units in Hesse, Germany  
51 1990-1999. *International journal of epidemiology* 2002;**31**:1061–8.  
52  
53  
54  
55  
56  
57  
58  
59  
60

- 1  
2  
3 29 Moster D, Lie RT, Markestad T. Relation between size of delivery unit and neonatal  
4 death in low risk deliveries: population based study. *Archives of disease in childhood*  
5 *Fetal and neonatal edition* 1999;**80**:F221–5.  
6  
7  
8  
9  
10 30 Bowman E, Doyle LW, Murton LJ, et al. Increased mortality of preterm infants  
11 transferred between tertiary perinatal centres. *Bmj*. Oct 29 1988;**297**(6656):1098-  
12 1100.  
13  
14  
15  
16 31 Lee SK, Zupancic JA, Pendray M, et al. Transport risk index of physiologic stability: a  
17 practical system for assessing infant transport care. *J Pediatr*. Aug 2001;**139**(2):220-  
18 226.  
19  
20  
21  
22  
23 32 Mistry H, Dowie R, Franklin RCG, et al. Costs of neonatal care for low-birthweight  
24 babies in English hospitals. *Acta paediatrica (Oslo, Norway)*: 1992) 2009;**98**:1123–9.  
25  
26  
27  
28 33 Gale C, Hay A, Philipp C, et al. In-utero transfer is too difficult: results from a  
29 prospective study. *Early human development* 2012;**88**:147–50.  
30  
31  
32  
33 34 Binder S, Hill K, Meinzen-Derr J, et al. Increasing VLBW deliveries at subspecialty  
34 perinatal centers via perinatal outreach. *Pediatrics* 2011;**127**:487–93.  
35  
36  
37  
38 35 Neto MT. Perinatal care in Portugal: effects of 15 years of a regionalized system. *Acta*  
39 *Paediatr* 2006;**95**:1349–52.  
40  
41  
42  
43 36 Delamothe T, Godlee F. Dr Lansley's Monster. *BMJ* 2011;**342**:d408–d408.  
44  
45  
46  
47  
48  
49  
50  
51  
52  
53  
54  
55  
56  
57  
58  
59  
60

**Table 1** Descriptive statistics for preterm infants born  $\leq 32^{+6}$  weeks gestation by neonatal unit characteristic at the hospital of birth

|                                                       | Designation of unit |                         |                      | Volume of unit <sup>a</sup> |                      |                      |
|-------------------------------------------------------|---------------------|-------------------------|----------------------|-----------------------------|----------------------|----------------------|
|                                                       | Tertiary level unit | Non-tertiary level unit | p-value <sup>b</sup> | High volume unit            | Non-high volume unit | p-value <sup>b</sup> |
| n (%)                                                 | 9,466 (46.1)        | 11,088 (54.0)           |                      | 9,541 (46.4)                | 11,013 (53.6)        |                      |
| Gestation (weeks), mean (SD)                          | 29.2 (2.5)          | 30.0 (2.1)              | <0.001               | 29.3 (2.5)                  | 29.9 (2.2)           | <0.001               |
| Birth weight (g), mean (SD)                           | 1,313.9 (438.7)     | 1,451.9 (404.5)         | <0.001               | 1326.6 (436.7)              | 1441.8 (409.4)       | <0.001               |
| Received full or partial course of antenatal steroids | 6,394 (67.6)        | 7,262 (65.5)            | 0.002                | 6,330 (66.4)                | 7,326 (66.5)         | 0.790                |
| Deprivation score bottom 10%                          | 2,020 (21.4)        | 1,342 (12.1)            | <0.001               | 1,730 (18.1)                | 1,632 (14.8)         | <0.001               |
| Male                                                  | 5,048 (53.3)        | 5,397 (53.4)            | 0.756                | 5,093 (53.4)                | 5,892 (53.5)         | 0.863                |
| Neonatal mortality                                    | 423 (4.5)           | 366 (3.3)               | <0.001               | 394 (4.1)                   | 395 (3.6)            | 0.043                |
| Any in-hospital mortality                             | 569 (6.0)           | 425 (3.8)               | <0.001               | 527 (5.5)                   | 467 (4.2)            | <0.001               |
| BPD <sup>c</sup>                                      | 3,695 (39.0)        | 2,856 (25.8)            | <0.001               | 3,548 (37.2)                | 3,003 (27.3)         | <0.001               |
| Treatment for ROP                                     | 226 (2.4)           | 107 (1.0)               | <0.001               | 195 (2.0)                   | 138 (1.3)            | <0.001               |
| Surgery for NEC                                       | 167 (1.8)           | 123 (1.1)               | <0.001               | 163 (1.7)                   | 127 (1.2)            | 0.001                |
| PMA <sup>d</sup> at discharge >40 <sup>+0</sup> weeks | 1,292 (13.7)        | 848 (7.7)               | <0.001               | 1,237 (13.0)                | 903 (8.2)            | <0.001               |

All values are n (%) unless otherwise stated.

<sup>a</sup> High volume was defined as being in the top quartile of units by number of care days provided to infants born at  $\leq 32^{+6}$  weeks gestation.

<sup>b</sup> Continuous variables were tested by t-test, categorical variables by chi-squared test.

<sup>c</sup> Bronchopulmonary dysplasia (BPD) defined as requirement of supplementary oxygen for at least 28 days post birth and at 36 weeks postmenstrual age.

<sup>d</sup> PMA at discharge = postmenstrual age at discharge, equal to gestational age at birth plus length of stay in weeks.

1  
2  
3  
4  
5  
6  
7  
8  
9  
10  
11  
12  
13  
14  
15  
16  
17  
18  
19  
20  
21  
22  
23  
24  
25  
26  
27  
28  
29  
30  
31  
32  
33  
34  
35  
36  
37  
38  
39  
40  
41  
42  
43  
44  
45  
46  
47  
48  
49

**Table 2** Adjusted odds ratios for outcomes associated with admission to either tertiary or high volume neonatal care at the hospital of birth using a “standard” logistic regression model

| Outcome                    | Tertiary neonatal unit  |                         | High volume neonatal unit <sup>a</sup>   |                         |                         |                                          |
|----------------------------|-------------------------|-------------------------|------------------------------------------|-------------------------|-------------------------|------------------------------------------|
|                            | (1)                     | (2)                     | (3)                                      | (4)                     | (5)                     | (6)                                      |
|                            | ≤32 <sup>+6</sup> weeks | ≤26 <sup>+6</sup> weeks | 27 <sup>+0</sup> -32 <sup>+6</sup> weeks | ≤32 <sup>+6</sup> weeks | ≤26 <sup>+6</sup> weeks | 27 <sup>+0</sup> -32 <sup>+6</sup> weeks |
| Neonatal mortality         | 0.77<br>(0.59-1.00)     | 0.65*<br>(0.46-0.91)    | 0.92<br>(0.69-1.22)                      | 0.73*<br>(0.56-0.95)    | 0.62**<br>(0.44-0.87)   | 0.86<br>(0.65-1.14)                      |
| Any in-hospital mortality  | 0.91<br>(0.72-1.15)     | 0.78<br>(0.57-1.06)     | 1.06<br>(0.83-1.36)                      | 0.83<br>(0.65-1.05)     | 0.71*<br>(0.52-0.97)    | 0.96<br>(0.75-1.24)                      |
| BPD                        | 1.23**<br>(1.07-1.40)   | 1.50**<br>(1.11-2.01)   | 1.17<br>(0.99-1.39)                      | 1.11<br>(0.97-1.28)     | 1.59**<br>(1.18-2.14)   | 1.02<br>(0.86-1.22)                      |
| Treatment for ROP          | 1.26<br>(0.91-1.75)     | 1.09<br>(0.76-1.57)     | 1.52<br>(0.91-2.55)                      | 0.95<br>(0.68-1.32)     | 0.81<br>(0.56-1.17)     | 1.22<br>(0.71-2.09)                      |
| Surgery for NEC            | 1.05<br>(0.76-1.44)     | 0.89<br>(0.58-1.36)     | 1.17<br>(0.80-1.70)                      | 1.05<br>(0.76-1.45)     | 0.94<br>(0.62-1.45)     | 1.11<br>(0.76-1.61)                      |
| PMA at discharge >40 weeks | 1.17<br>(0.97-1.41)     | 1.09<br>(0.87-1.37)     | 1.19<br>(0.97-1.47)                      | 1.13<br>(0.94-1.37)     | 1.11<br>(0.89-1.38)     | 1.11<br>(0.90-1.37)                      |

Values are odd ratios (95% confidence interval). \* p<0.05, \*\* p<0.01, \*\*\* p<0.001

BPD=Bronchopulmonary Dysplasia, PMA at discharge=postmenstrual age at discharge, equal to gestational age at birth plus the length of stay in weeks. Models are adjusted for gestational age, gestational age squared, birthweight z score, use of antenatal steroids, gender, infant year of birth and deprivation.

<sup>a</sup> High volume was defined as being in the top quartile of units by number of care days provided to infants born at ≤32<sup>+6</sup> weeks gestation.

**Table 3** Descriptive statistics for the sample of preterm infants born  $\leq 32^{+6}$  weeks gestation by designation of the neonatal unit nearest to maternal place of residence

|                                                       | Unit level designation      |                                 | Unit volume <sup>a</sup> |                                                    |                          |                              |                      |                                                    |
|-------------------------------------------------------|-----------------------------|---------------------------------|--------------------------|----------------------------------------------------|--------------------------|------------------------------|----------------------|----------------------------------------------------|
|                                                       | Nearest unit tertiary level | Nearest unit non-tertiary level | p-value <sup>b</sup>     | p-value <sup>c</sup> , controlling for deprivation | Nearest unit high volume | Nearest unit non-high volume | p-value <sup>b</sup> | p-value <sup>c</sup> , controlling for deprivation |
| n (%)                                                 | 7,167 (34.9)                | 13,387 (65.1)                   |                          |                                                    | 7,357 (35.8)             | 13,197 (64.2)                |                      |                                                    |
| Gestation (weeks), mean (SD)                          | 29.6 (2.4)                  | 29.7 (2.3)                      | 0.040                    | 0.418                                              | 29.6 (2.4)               | 29.6 (2.3)                   | 0.181                | 0.526                                              |
| Birth weight (g), mean (SD)                           | 1377.4 (429.2)              | 1394.2 (424.5)                  | 0.007                    | 0.262                                              | 1376.7 (426.7)           | 1394.8 (425.7)               | 0.004                | 0.111                                              |
| Received Full or partial course of antenatal steroids | 4,703 (65.6)                | 8,953 (66.9)                    | 0.069                    | 0.584                                              | 4,749 (64.6)             | 8,907 (67.5)                 | <0.001               | 0.052                                              |
| Deprivation score -bottom 10%                         | 1,751 (24.4)                | 1,611 (12.0)                    | <0.001                   | NA                                                 | 1,476 (20.1)             | 1,886 (14.3)                 | <0.001               | NA                                                 |
| Male                                                  | 3,820 (53.3)                | 7,165 (53.5)                    | 0.761                    | 0.854                                              | 3,958 (53.8)             | 7,027 (53.3)                 | 0.447                | 0.378                                              |
| Birth in hospital with tertiary level unit            | 4,753 (88.4)                | 2,290 (22.5)                    | <0.001                   | <0.001                                             | 3,839 (69.5)             | 3,204 (31.9)                 | <0.001               | <0.001                                             |
| Birth in hospital with high volume unit               | 3,703 (68.9)                | 3,374 (33.1)                    | <0.001                   | <0.001                                             | 4,764 (86.3)             | 2,313 (23.0)                 | <0.001               | <0.001                                             |

1  
2  
3  
4  
5  
6  
7  
8  
9  
10  
11  
12  
13  
14  
15  
16  
17  
18  
19  
20  
21  
22  
23  
24  
25  
26  
27  
28  
29  
30  
31  
32  
33  
34  
35  
36  
37  
38  
39  
40  
41  
42  
43  
44  
45  
46  
47  
48  
49

All values are n (%) and are a proportion of the column total unless otherwise stated.  
<sup>a</sup> High volume was defined as being in the top quartile of units by number of care days provided to infants born at  $\leq 32^{+6}$  weeks gestation.  
<sup>b</sup> Continuous variables were tested by t-test, categorical variables by chi-squared test.  
<sup>c</sup> P-value of F-test of coefficient on instrument from a regression of variable of interest on instrument and deprivation indicator.

For peer review only

**Table 4** Adjusted odds ratios for outcomes associated with admission to either tertiary or high volume neonatal care at the hospital of birth using an instrumental variable logistic regression model

| Outcome                                  | Tertiary neonatal unit  |                         |                                          | High volume neonatal unit <sup>a</sup> |                         |                                          |
|------------------------------------------|-------------------------|-------------------------|------------------------------------------|----------------------------------------|-------------------------|------------------------------------------|
|                                          | (1)                     | (2)                     | (3)                                      | (4)                                    | (5)                     | (6)                                      |
|                                          | ≤32 <sup>+6</sup> weeks | ≤26 <sup>+6</sup> weeks | 27 <sup>+0</sup> -32 <sup>+6</sup> weeks | ≤32 <sup>+6</sup> weeks                | ≤26 <sup>+6</sup> weeks | 27 <sup>+0</sup> -32 <sup>+6</sup> weeks |
| Neonatal Mortality                       | 0.87<br>(0.66-1.15)     | 1.01<br>(0.63-1.61)     | 0.82<br>(0.58-1.14)                      | 0.70*<br>(0.53-0.92)                   | 0.54**<br>(0.33-0.87)   | 0.80<br>(0.56-1.13)                      |
| Any in hospital mortality                | 0.85<br>(0.68-1.06)     | 0.95<br>(0.62-1.44)     | 0.84<br>(0.64-1.10)                      | 0.68**<br>(0.54-0.85)                  | 0.51**<br>(0.33-0.79)   | 0.80<br>(0.60-1.07)                      |
| BPD                                      | 1.19<br>(0.95-1.49)     | 1.04<br>(0.66-1.64)     | 1.17<br>(0.91-1.51)                      | 1.05<br>(0.85-1.29)                    | 1.78**<br>(1.12-2.81)   | 0.96<br>(0.75-1.22)                      |
| Treatment for ROP                        | 1.91*<br>(1.16-3.14)    | 1.57<br>(0.83-2.96)     | 2.17*<br>(1.06-4.47)                     | 1.02<br>(0.60-1.73)                    | 0.58<br>(0.29-1.15)     | 1.84<br>(0.83-4.05)                      |
| Surgery for NEC                          | 1.17<br>(0.72-1.90)     | 0.81<br>(0.40-1.66)     | 1.34<br>(0.76-2.38)                      | 1.26<br>(0.76-2.07)                    | 1.11<br>(0.54-2.28)     | 1.35<br>(0.75-2.43)                      |
| PMA at discharge >40 <sup>+0</sup> weeks | 0.95<br>(0.73-1.22)     | 0.83<br>(0.60-1.13)     | 0.97<br>(0.72-1.31)                      | 0.92<br>(0.72-1.17)                    | 1.04<br>(0.78-1.40)     | 0.86<br>(0.67-1.14)                      |

Values are odd ratios (95% confidence interval). \* p<0.05, \*\* p<0.01, \*\*\* p<0.001

BPD=Bronchopulmonary Dysplasia, PMA at discharge=postmenstrual age at discharge, equal to gestational age at birth plus the length of stay in weeks. Models are adjusted for gestational age, gestational age squared, birthweight z score, use of antenatal steroids, gender, infant year of birth and deprivation.

<sup>a</sup> High volume was defined as being in the top quartile of units by number of care days provided to infants born at ≤32<sup>+6</sup> weeks gestation



1  
2  
3 **The effects of designation and volume of neonatal**  
4 **care on mortality and morbidity outcomes of very**  
5 **preterm infants in England: Retrospective**  
6 **population-based cohort study**  
7  
8  
9  
10  
11  
12  
13  
14  
15  
16

17 **Watson, S. I.**, Health Economist, Warwick Medical School, University of Warwick, Coventry

18  
19  
20 **Arulampalam, W.**, Professor of Economics, Department of Economics, University of  
21  
22 Warwick, Coventry  
23

24 **Petrou, S.**, Professor of Health Economics, Warwick Medical School, University of Warwick,  
25  
26 Coventry  
27

28  
29 **Marlow, N.**, Professor of Neonatal Medicine, Academic Neonatology, UCL Institute for  
30  
31 Women's Health, London  
32  
33

34 **Morgan, A.S.**, Senior Clinical Research Associate, Academic Neonatology, UCL Institute for  
35  
36 Women's Health, London  
37  
38

39 **Draper, E.S.**, Professor of Perinatal & Paediatric Epidemiology, Department of Health  
40  
41 Sciences, University of Leicester  
42  
43

44 **Santhakumaran, S.**, Statistician, Section of Neonatal Medicine, Department of Medicine,  
45  
46 Chelsea and Westminster Campus, Imperial College London, London  
47  
48

49 **Modi, N.**, Professor of Neonatal Medicine, Section of Neonatal Medicine, Department of  
50  
51 Medicine, Chelsea and Westminster Campus, Imperial College London, London  
52  
53

54 **On behalf of the Neonatal Data Analysis Unit and the NESCOP Group**  
55  
56  
57  
58  
59  
60

1  
2  
3 *Keywords:* Neonatal intensive care units; high-volume hospitals; place of birth; neonatal  
4  
5 mortality  
6

7  
8 *Word count:* 3,497  
9

10  
11 *Corresponding author:*  
12

13 Samuel I. Watson,  
14  
15 Warwick Medical School,  
16  
17 University of Warwick,  
18  
19 Coventry,  
20  
21 CV4 7AL,  
22  
23 United Kingdom.  
24

25  
26 Tel: +44 (0) 7502 457 817.  
27

28 Email: [s.i.watson@warwick.ac.uk](mailto:s.i.watson@warwick.ac.uk)  
29  
30  
31  
32  
33  
34  
35  
36  
37  
38  
39  
40  
41  
42  
43  
44  
45  
46  
47  
48  
49  
50  
51  
52  
53  
54  
55  
56  
57  
58  
59  
60

## ABSTRACT

**Objective:** To examine the effects of designation and volume of neonatal care at the hospital of birth on mortality and morbidity outcomes in very preterm infants in a managed clinical network setting.

**Design:** A retrospective, population based analysis of operational clinical data using adjusted logistic regression and instrumental variables (IV) analyses.

**Setting:** 165 National Health Service neonatal units in England contributing data to the National Neonatal Research Database at the Neonatal Data Analysis Unit and participating in the Neonatal Economic, Staffing, and Clinical Outcomes Project.

**Participants:** 20,554 infants born at <33 weeks completed gestation (17,995 born at 27-32 weeks; 2,559 born at <27 weeks), admitted to neonatal care and either discharged or died, over the period 1<sup>st</sup> January 2009 to 31<sup>st</sup> December 2011.

**Intervention:** Tertiary designation or high volume neonatal care at the hospital of birth.

**Outcomes:** Neonatal mortality, any in-hospital mortality, surgery for necrotising enterocolitis, surgery for retinopathy of prematurity, bronchopulmonary dysplasia and postmenstrual age at discharge.

**Results:** Infants born at <33 weeks gestation and admitted to a high volume neonatal unit at the hospital of birth were at reduced odds of neonatal mortality (IV regression odds ratio [OR]: 0.70, 95% confidence interval [CI]: 0.53-0.92) and any in-hospital mortality (IV regression OR: 0.68, 95% CI: 0.54-0.85). The effect of volume on any in-hospital mortality was most acute amongst infants born at <27 weeks gestation (IV regression OR: 0.51, 95% CI: 0.33-0.79). A negative association

1  
2  
3 between tertiary-level unit designation and mortality was also observed with adjusted  
4  
5 logistic regression for infant born at <27 weeks gestation.  
6  
7

8 **Conclusions:** High volume neonatal care provided at the hospital of birth may  
9  
10 protect against in-hospital mortality in very preterm infants. Future developments of  
11  
12 neonatal services should promote delivery of very preterm infants at hospitals with  
13  
14 high volume neonatal units.  
15  
16  
17  
18  
19  
20  
21  
22  
23  
24  
25  
26  
27  
28  
29  
30  
31  
32  
33  
34  
35  
36  
37  
38  
39  
40  
41  
42  
43  
44  
45  
46  
47  
48  
49  
50  
51  
52  
53  
54  
55  
56  
57  
58  
59  
60

## ARTICLE SUMMARY

### Strengths and limitations of this study

- A national dataset consisting of the electronic patient records of a large majority of admissions to neonatal specialist care in England
- The analysis takes into account both observed and unobserved confounding
- A weakness is that the analysis is unable to disentangle the effects of the neonatal unit at the place of birth from subsequent transfers to other neonatal units

## INTRODUCTION

Intense debate has revolved around the optimal organisation of neonatal critical care services. Numerous studies have suggested that the intensity and volume of neonatal care at the hospital of birth is negatively correlated with adverse clinical outcomes, including mortality.[1–11] This has contributed to calls for centralisation of neonatal services and the closure of smaller neonatal units.[2,11,12]

Following a review by the Department of Health in 2003, perinatal centres in England were reorganised into managed clinical networks (MCN).[13] MCNs provide some of the benefits of centralisation, but also strive to maintain equity and ease of access to services by keeping lower care level and lower volume neonatal units open, with provision for transfer to higher care level or higher volume units, if required.[13] Particular emphasis is placed on the importance of transferring women at risk of extremely preterm labour to tertiary centres before delivery. Consequently, most networks aim to transfer women at high risk of delivery at <27 weeks of gestation. We have previously shown that, since the formation of MCNs, both the proportion of low gestational age infants born in hospitals with higher designation neonatal units and their transfer rate between hospitals has increased significantly; however, it remains unclear what effect this has had on clinical outcomes.[14]

Studies that have examined the effects of neonatal unit designation or volume of neonatal care provided at the hospital of birth have shown that low designation level or volume is associated with increased rates of mortality,[1–10] decreased infection rate,[7] increased severe periventricular haemorrhage,<sup>11</sup> and increased bronchopulmonary dysplasia.[7] However, these studies were almost exclusively conducted in the United States where there is greater variability in neonatal unit volume—the highest volume units in the US are typically much larger than equivalent units in England—and there ~~are~~ are no formal arrangements for MCNs. Results from similar studies using data from the UK are limited and based on data from 1998-9, prior to the formation of MCNs.[15,16] We are not aware of any studies that

1  
2  
3 have examined infant outcomes for neonatal specialist services in MCNs in relation to unit  
4 designation or volume. In addition, organisation of neonatal care differs between countries  
5 potentially affecting the generalisability of results from these systems; for example, in  
6  
7 Germany neonatal services are markedly deregionalized whereas in Finland and Portugal  
8  
9 there is a high degree of regionalization.[17]  
10  
11

12  
13  
14 Our aim in this study was to examine the effects of designation and volume of neonatal care  
15 provided at the hospital of birth on mortality and morbidity outcomes. We assess whether  
16 organisational factors remain determinants of clinical outcomes despite the goals of neonatal  
17 reorganisation that sought to ensure that vulnerable infants are not disadvantaged by their  
18 place of birth.  
19  
20  
21  
22  
23

## 24 25 **METHODS**

### 26 27 **Data source and study population**

28  
29  
30  
31 For the purpose of this empirical investigation, we extracted data from the National Neonatal  
32 Research Database (NNRD) for neonatal units participating the Neonatal Economic,  
33 Staffing, and Clinical Outcomes Project (NESCOP). The NNRD is held by the Neonatal Data  
34 Analysis Unit (NDAU), Imperial College, London, and was created from patient-level  
35 electronic records of all infants admitted to 168 of 173 neonatal units in England. Approval  
36 for data collection was obtained from the national research ethics service (reference REC  
37 10/H0803/151) as well as the Caldicott Guardians of each NHS Trust. NESCOP included  
38 165 centres providing perinatal care. On behalf of NESCOP, the MRC EPICure studies  
39 carried out the Unit Profile Survey (UPS) during 2011, comprising a survey of English  
40 hospitals that provided onsite obstetric and neonatal services. We extracted records from the  
41 NNRD of all infants born in participating hospital-centres at  $\leq 32^{+6}$  weeks<sup>+days</sup> gestation,  
42 admitted over the period 1<sup>st</sup> January 2009 to 31<sup>st</sup> December 2011, ~~born at these units~~ and  
43 who were discharged or died over the same period. We excluded infants who only received  
44 transitional care (n=5), which was defined according to English Department of Health's  
45  
46  
47  
48  
49  
50  
51  
52  
53  
54  
55  
56  
57  
58  
59  
60

1  
2  
3 | [Healthcare Resource Group \(HRG4\) code "XA04Z".\[18\]](#) Gestational age was determined by  
4  
5 | ultrasound scan.  
6  
7

## 9 **Outcomes**

10  
11 We derived the following outcomes from the extracted data for use in the analyses: 28-day  
12  
13 | (neonatal) mortality, any in-hospital mortality, [treatment-surgery](#) for necrotising enterocolitis  
14  
15 | (NEC), treatment for retinopathy of prematurity (ROP), and bronchopulmonary dysplasia  
16  
17 | (BPD). We defined BPD as the requirement of supplementary oxygen for at least 28 days  
18  
19 | and at 36 weeks postmenstrual age (PMA).[198] We also examined PMA at discharge as a  
20  
21 | marker of length of stay; this was defined as the gestational age at birth plus the length of  
22  
23 | stay at final discharge from any neonatal unit or death. We defined the outcome to be one if  
24  
25 | the PMA at discharge was greater than 40 weeks and zero otherwise.  
26  
27

## 29 **Covariates**

30  
31 To determine appropriate covariates, we reviewed previous prediction models for very  
32  
33 | preterm infants[20-19] and selected variables that a) were significant predictors of adverse  
34  
35 | sequelae, b) were available in our dataset and of high quality, and c) not confounded by the  
36  
37 | provision of neonatal care. The variables we included were: gestational age at birth,  
38  
39 | gestational age squared, birth weight z-score (birth weight standardised by gestational age  
40  
41 | week), and the following indicators: whether the mother received a full or partial course of  
42  
43 | antenatal steroids, sex, infant year of birth, and whether or not the mother came from an  
44  
45 | area within the lowest decile of the Index of Multiple Deprivation 2007 score.[219]  
46  
47

## 49 **Statistical methods**

50  
51 We conducted two separate sets of analyses based on whether or not infants were admitted  
52  
53 | to a neonatal unit at the hospital of birth designated as: (i) a tertiary centre,[220] or (ii) high  
54  
55 | volume. For the latter, we defined volume according to the annual number of care days at  
56  
57 | any level of care provided to very preterm infants ( $\leq 32^{+6}$  weeks gestation). A 'high volume'  
58  
59



1  
2  
3 unit was defined as one whose volume was in the top quartile of all neonatal units in the  
4 sample. 'High volume' was determined by quartile rather than an absolute care day  
5 threshold to facilitate comparison with other measures of volume in the sensitivity analyses.  
6  
7 A previous study that examined organisational characteristics of neonatal units also  
8 categorised volume using quartiles.[17] Dichotomising by upper quartile divided the infants  
9 between high and low volume units in approximately the same proportion as between tertiary  
10 and non-tertiary level units. To aid comparison with other studies, in particular from the US,  
11 and as a robustness check, 'high volume' was also defined as 100 very low birth-weight  
12 (VLBW; <1,500g) admissions of infants born in the same hospital per annum.  
13  
14  
15  
16  
17  
18  
19  
20  
21

22 We first conducted an unadjusted comparison of clinical characteristics and outcomes of  
23 infants by unit characteristics. Secondly, we estimated an adjusted model, and thirdly, we  
24 conducted an adjusted comparison using an instrumental variables methodology to account  
25 for unobserved confounding. In the absence of a randomised control trial, instrumental  
26 variables methodology acts as an *ex post* randomisation and enables us to estimate the  
27 'causal effects' of designation and volume of neonatal care provided at the hospital of birth.  
28 The methodology involves the use of a variable, called an "instrument", which, in this  
29 context, needs to fulfil two criteria: 1) it should be strongly correlated with the characteristics  
30 of the neonatal unit at the hospital of birth; and 2) it should be uncorrelated with the  
31 outcomes of interest conditional on observed covariates and therefore uncorrelated with  
32 unobserved confounders.  
33  
34  
35  
36  
37  
38  
39  
40  
41  
42  
43  
44

45 For the instruments, we used indicators for the designated level of care of the nearest  
46 neonatal unit to the mother's residence, an indicator for whether it had surgical facilities, an  
47 indicator for whether it was high volume, the distance to the nearest neonatal unit, and the  
48 interactions of either the level of care indicators or high volume indicator with distance, giving  
49 nine instruments in total. Straight line distance was calculated from the population weighted  
50 centre of the mother's Lower Super Output Area to each hospital.[232]  
51  
52  
53  
54  
55  
56  
57  
58  
59  
60

1  
2  
3 These instrumental variables fulfil condition (1) if infants are more likely to be born in the  
4 hospital closest to the mother's residence. They will also fulfil condition (2) if the location of  
5 the mother's residence is uncorrelated with an infant's unobserved clinical risk. We tested for  
6 a difference in observed characteristics by level and volume of the nearest neonatal unit.  
7 However, tertiary level and high volume units are more likely to be in urban areas that are  
8 socioeconomically deprived so we may expect to see more preterm and low birth weight  
9 infants being born in these areas.[243] We therefore also controlled for local deprivation  
10 when testing for a difference in means by nearest neonatal unit characteristics by estimating  
11 a linear regression of the observed variable of interest on the nearest neonatal unit  
12 characteristic and deprivation indicator, and using an F-test to test the coefficient on the  
13 nearest neonatal unit characteristic variable.

14  
15  
16  
17  
18  
19  
20  
21  
22  
23  
24  
25  
26 As the outcomes are all binary logistic regression was used. In order to employ instrumental  
27 variables estimation in this framework, two stage residual inclusion (2SRI) was used.[254]  
28 The 2SRI method is explained in online Appendix A. The standard errors were adjusted for  
29 clustering within units.

30  
31  
32  
33  
34  
35 Our baseline analyses examined infants born at  $\leq 32^{+6}$  weeks gestation. We then conducted  
36 analyses on subsets of infants born at  $\leq 26^{+6}$  weeks gestation or at  $27^{+0}$ - $32^{+6}$  weeks  
37 gestation;  $\leq 26^{+6}$  weeks gestation is the cut-off used by perinatal networks for prioritising  
38 inter-unit transfers. 'Statistical significance', where discussed, refers to a 5% significance  
39 level in all cases.

#### 40 41 42 43 44 45 46 **Missing data and sensitivity analyses**

47  
48  
49 Infants with missing outcomes data were excluded from the analyses, whilst those with  
50 missing covariate data were assigned a zero in the case of binary indicators. There were no  
51 infants with missing continuous covariates. We excluded all infants with any missing data as  
52 a further sensitivity analysis.

1  
2  
3 Separate sensitivity analyses, using our preferred method of instrumental variables logistic  
4 regression, also explored the effects of: (i) including unit random effects in the statistical  
5 models; (ii) removing infants who died from analyses of the morbidity and PMA at discharge  
6 outcomes and defining a new outcome of any in-hospital mortality and/or BPD [to account for](#)  
7 [possible bias caused by infants dying prior to experiencing the morbidity outcome](#); (iii)  
8 redefining high volume as the top 25% of units in terms of intensive care days provided to  
9  $\leq 32^{+6}$  gestational week infants; (iv) redefining high volume as the top 25% of units in terms of  
10 number of  $\leq 32^{+6}$  gestational week infants cared for; and (v) redefining high volume as at  
11 least 100 VLBW infants born in and admitted to the neonatal unit in the hospital per annum.  
12  
13  
14  
15  
16  
17  
18  
19  
20  
21

22 All analyses were carried out with R 2.14.2 and Stata 11.  
23  
24

## 25 RESULTS

26  
27

28 In total, data for 20,554 infants born at  $\leq 32^{+6}$  weeks gestation over the study period and  
29 admitted to a neonatal unit at the hospital of birth were extracted from the NNRD, 2,559 of  
30 whom were born at  $\leq 26^{+6}$  weeks gestation. Table 1 provides descriptive statistics of the  
31 samples analysed.  
32  
33  
34  
35  
36

37 In the sample, 9,466 (46.1%) infants were born in hospitals with a tertiary level neonatal unit  
38 and 9,541 (46.4%) were born in hospitals with a high volume neonatal unit. The cut-off for  
39 high volume was approximately 3,480 annual care days for infants born at  $\leq 32^{+6}$  weeks  
40 gestation in each hospital. The total sample of 20,554 infants were born in 165 different  
41 hospitals, 44 (26.7%) of which had level three neonatal units, 81 (49.0%) level two neonatal  
42 units, and 39 (23.6%) level one neonatal units. There were 39 (23.6%) neonatal units  
43 classified as high volume, 30 (78.0%) of which were designated level three units;  
44 consequently, 14 of the 44 (31.8%) level three designated units were not classified as high  
45 volume. Among the 20,554 infants, 1,892 (9.2%) were born in hospitals with neonatal units  
46 that were classified as high volume but not tertiary level and 1,817 (8.8%) were born in  
47 hospitals with neonatal units classified as tertiary level but not high volume.  
48  
49  
50  
51  
52  
53  
54  
55  
56  
57  
58  
59  
60

### 'Standard' adjusted results

Table 2 presents the estimated adjusted odds ratios associated with admission to either tertiary or high volume neonatal care [at](#) the hospital of birth.

The standard logistic regressions did not reveal a statistically significant difference in the odds of mortality for very preterm infants admitted to tertiary level care at the hospital of birth compared to their counterparts admitted to non-tertiary level care. However, when considering only infants born at  $\leq 26^{+6}$  weeks gestation, we found a reduction in the odds of neonatal mortality (OR: 0.65, 95% CI: 0.46-0.91,  $p=0.012$ ), but not any in-hospital mortality.

[For infants admitted to a high volume neonatal unit at the hospital of birth, ~~A~~](#) reduced odds of neonatal mortality was observed for [infants ~~those~~](#) born at  $\leq 32^{+6}$  weeks gestation (OR: 0.73, 95% CI: 0.56-0.95,  $p=0.018$ ) [and](#) [at](#)  $\leq 26^{+6}$  weeks gestation (OR: 0.62, 95% CI: 0.44-0.87,  $p=0.006$ ) [and admitted to a high volume neonatal unit at the hospital of birth](#), but this was not replicated for infants born at  $27^{+0}$ - $32^{+6}$  weeks gestation. [Those ~~h~~](#) infants born at  $\leq 26^{+6}$  weeks gestation were also at reduced odds of any in-hospital mortality (0.71, 95% CI: 0.52-0.97,  $p=0.033$ ) and increased odds of BPD (OR: 1.59, 95% CI: 1.18-2.14,  $p=0.002$ ) [compared to their counterparts admitted to a non-high volume neonatal unit at the hospital of birth](#). There were no other statistically significant differences observed for the morbidity outcomes.

### Instrument validity

The instruments were strongly correlated with the characteristics of the unit at the hospital of birth; 88.4% of infants whose nearest neonatal unit was designated level three were born in a hospital with a level three unit compared to only 22.5% of infants whose nearest neonatal unit was not designated level three. Table 3 shows descriptive statistics for the 20,554 very preterm infants by the designation and volume of the neonatal unit nearest to the mother's place of residence. After correcting for deprivation, there were no statistically significant differences in the observed covariates.

### Instrumental variables logistic regression

Table 4 shows the estimated odds ratios using the instrumental variables logistic regressions. We found no significant differences in neonatal mortality between infants admitted to either tertiary or non-tertiary neonatal care at the hospital of birth. We did find an increased odds of treatment for ROP for very preterm infants born at 27<sup>+0</sup>-32<sup>+6</sup> weeks gestation born in a hospital with a tertiary level unit (OR: 2.17, 95% CI: 1.06-4.47, p=0.035).

In contrast to the effect of tertiary level care, admission to a high volume neonatal unit at the hospital of birth significantly reduced the odds of neonatal mortality (OR: 0.70, 95% CI: 0.53-0.92, p=0.011) and any in-hospital mortality (OR: 0.68, 95% CI: 0.54-0.85, p=0.001) in very preterm infants. These effects were most acute amongst infants born at  $\leq 26^{+6}$  weeks gestation. In terms of morbidity, the only significant effect was found for BPD (OR: 1.78, 95% CI: 1.12-2.81, p=0.014) for infants born at  $\leq 26^{+6}$  weeks gestation and admitted to high volume neonatal care at the hospital of birth.

### Sensitivity Analyses

The results from the sensitivity analyses are presented in Appendix B. There were 1,172 (5.7%) infants with missing data for antenatal steroids; there were no missing values for the other covariates. The results remained qualitatively similar when all infants with any missing data were excluded from the analyses (table B1).

The results remained robust to the inclusion of unit level random effects. We further excluded infants who died from the analyses of morbidity outcomes. This did not reveal any evidence of differences in the odds ratios except for the odds of treatment for ROP for infants admitted to tertiary level care at the hospital of birth (OR: 1.96, 95% CI: 1.15-3.32, p=0.013) (table B2). No evidence of an effect for the outcome defined as any in-hospital mortality and/or BPD was observed (table B2). Three alternative measures of volume were also used. In these sensitivity analyses, the odds of any in-hospital mortality remained significantly lower for very preterm infants admitted to a high volume unit at the hospital of

1  
2  
3 birth (table B3 and B4). Only eight hospitals (4.8%) met the criteria of at least 100 VLBW  
4 infants per annum in any of the study years so that only a small proportion (6.5%) of the  
5 sample ~~were~~ inborn and admitted to these units. There is therefore imprecision around  
6  
7 these results with wide confidence intervals; amongst these infants, the odds of any in-  
8 hospital mortality was significantly lower but not statistically significant (table B4).  
9  
10  
11  
12

## 13 DISCUSSION

14  
15  
16  
17 We examined the effects of designation and volume of neonatal care provided at the hospital  
18 of birth on mortality and morbidity outcomes for very preterm infants in England. Our key  
19 finding was a consistent reduction in the odds of mortality for very preterm infants admitted  
20 to high volume neonatal units. We examined infants born at  $\leq 26^{+6}$  weeks gestation and  
21 those born at  $27^{+6}$ - $32^{+6}$  weeks gestation separately to reflect transfer policies and found a  
22 statistically significant reduction in the odds of mortality in the former group only.  
23  
24  
25  
26  
27  
28

29 Furthermore, we found differences in the odds of mortality outcomes between standard  
30 logistic regressions and our preferred instrumental variables approach. The standard logistic  
31 regressions were generally found to under-estimate the beneficial effects of high volume  
32 care on mortality outcomes. This was expected given the aim of MCNs to transfer high risk  
33 infants to high volume and designation units. With regards to morbidity outcomes, treatment  
34 for ROP was the only morbidity for which a statistically significant effect was observed  
35 across analyses. We found that infants born at  $27^{+6}$ - $32^{+6}$  weeks gestation in hospitals with  
36 tertiary level units were at increased odds of receiving treatment for ROP; however, only a  
37 very small number of these infants received treatment for ROP (86/17,995; 0.5%),  
38 suggesting the observed difference may not be clinically significant.  
39  
40  
41  
42  
43  
44  
45  
46  
47  
48  
49

50 Our preferred instrumental variables methodology, in the absence of a randomised  
51 assignment of infants to units, enabled us to estimate the causal effects of designation and  
52 volume of neonatal care provided at the hospital of birth using observational data. This  
53 approach has been widely applied in other healthcare evaluations.<sup>[265]</sup> However, we can  
54  
55  
56  
57  
58  
59  
60

1  
2  
3 only identify one previous application of this methodology to the evaluation of perinatal  
4  
5 outcomes.[7] Our findings agree with the findings of an US-based study that examined the  
6  
7 separate effects of level and volume of neonatal care.[4] We also found a reduction in the  
8  
9 odds of mortality when analysing the annual number of VLBW admissions of inborn infants—  
10  
11 a measure frequently used in US studies of this nature.[2]

12  
13  
14 We acknowledge limitations to our study. First, instrumental variables methodology only  
15  
16 identifies the effect of an intervention or treatment for those individuals whose assignment to  
17  
18 treatment is altered by the instrumental variable.[276] We do not know the effects for infants  
19  
20 who would always be born in hospitals with a high level or volume neonatal unit despite the  
21  
22 location of the mother's residence (see online Appendix A). Nevertheless, we demonstrated  
23  
24 the validity of our instruments in meeting the required assumptions. Importantly, the  
25  
26 assumptions required for an instrumental variables methodology are weaker than those  
27  
28 required to support a "standard" analysis, which requires that infants are randomly assigned  
29  
30 to hospitals of birth; otherwise the estimated odds ratios will be biased. Second, due to data  
31  
32 limitations we cannot control for the effects of care and risk of death in the delivery suite at  
33  
34 the hospital of birth. However, high volume delivery units have been shown to be associated  
35  
36 with a reduced risk of neonatal mortality.[287,298] Since high volume delivery units are often  
37  
38 found in hospitals with high volume neonatal care this would lead us to suspect that our  
39  
40 analyses underestimate the benefits of birth in hospitals with high volume neonatal care.

41  
42  
43 Third, we are unable to disentangle the effects of the unit at the place of birth and  
44  
45 subsequent transfers on final outcomes. We therefore cannot assess whether increasing the  
46  
47 provision of transfers attenuates the increased odds of mortality associated with birth in  
48  
49 hospitals without high volume neonatal care. While identification of acute neonatal transfers  
50  
51 was possible from our data, identifying the effects of transfer on outcomes presents a  
52  
53 number of difficult statistical issues. However, we expect that, if transfers [to high volume](#)  
54  
55 [units](#) reduce the odds of mortality, our effects presented in this paper underestimate the  
56  
57 benefit of birth in a hospital with high level or volume neonatal care (see Appendix A for an  
58  
59  
60

1  
2  
3 extended discussion). [Although neonatal transport itself may have negative effects on](#)  
4 [infant health outcomes.\[30,31\]](#) -A final limitation is that a small number of neonatal units in  
5  
6  
7 England (n=8) across MCNs do not contribute data to the NNRD and/or participate in  
8  
9 NESCOP. The effect of also including data from these units on outcomes remains a topic for  
10  
11 future enquiry.

12  
13  
14  
15 An intervention that increases the proportion of very preterm infants born in hospitals with  
16  
17 high volume neonatal units may involve increasing the proportion of in-utero transfers.  
18  
19 Transfers of women prior to delivery are generally preferable because they are believed to  
20  
21 be both safer and less expensive than postnatal transfers of vulnerable infants.[3229]  
22  
23 However, a study in 2009 showed that almost one half of all in-utero transfer requests to the  
24  
25 London Ambulance Service were unsuccessful for non-clinical reasons.[330] [Furthermore,](#)  
26  
27 [studies from other regions/countries, including Portugal, Finland, and the United States, have](#)  
28  
29 [shown that in more regionalised systems as many as 90-95% of very preterm or very low](#)  
30  
31 [birth weight infants are born in hospitals with tertiary designation neonatal units.\[10,34,35\]](#)  
32  
33 The effects of transfers within different organisational structures for neonatal care remains  
34  
35 an important area for future research especially as the new [English](#) Operational Delivery  
36  
37 Networks will supersede the perinatal MCNs as part of the changes following the Health and  
38  
39 Social Care Act (2012).[364]

40  
41  
42 In conclusion, instrumental variables methodology did not reveal evidence of a difference in  
43  
44 mortality outcomes between very preterm infants admitted to either tertiary or non-tertiary  
45  
46 neonatal care at the hospital of birth. However, we do provide evidence of reduced odds of  
47  
48 mortality for very preterm infants admitted to high volume neonatal units at delivery  
49  
50 hospitals. The effect of volume on neonatal outcomes is an important consideration for policy  
51  
52 makers deciding the optimal organisation of neonatal specialist services.  
53  
54  
55  
56  
57  
58  
59  
60



## Acknowledgements

We thank Nicola Fitz-Simon for invaluable advice on statistical issues and Eugene Statnikov and Daniel Gray for assistance with the data. We thank the staff from neonatal units involved in capturing electronic data and Richard Colquhoun, Neonatal Data Analysis Unit manager, and Surbhi Shah for administrative support. We would also like to thank Andy Cole, Kate Bennett, Helen Kirrane, and the Steering Board of the Neonatal Data Analysis Unit.

We would also like to thank the following contributing neonatal units and clinical leads (all units were included in the NESOP survey and offered an "opt out" of service evaluation that made use of NNRD data):

Matthew Babirecki, Airedale General Hospital; Andrew Gallagher, Alexandra Hospital; D Manning, Arrowe Park Hospital; Tim Wickham, Barnet Hospital; MA Saeed, Barnsley District General Hospital; Nawfal Sharief, Basildon Hospital; Ruth Wigfield, Basingstoke & North Hampshire Hospital; Nigel Brooke, Bassetlaw District General Hospital; Raghavan Kadalraja, Bedford Hospital; Julie Nycyk, Birmingham City Hospital; Mike Watkinson, Birmingham Heartlands Hospital; Imogen Morgan, Birmingham Women's Hospital; Sam Oddie, Bradford Royal Infirmary; R.N Mahesh Babu, Broomfield Hospital; Eleri Crosbie, Calderdale Royal Hospital; Tim Wickham, Chase Farm Hospital; Gary Hartnoll, Chelsea & Westminster Hospital; Aiwyne Foo, Chesterfield Royal Hospital; Sarah Dalton, Colchester General Hospital; Graham Whincup, Conquest Hospital; Stephen Brearey, Countess of Chester Hospital; John Chang, Croydon University Hospital (Mayday); Mahfud Ben-Hamida, Cumberland Infirmary; Abdul Hasib, Darent Valley Hospital; S Subramania Krish Namoorthy, Darlington Memorial Hospital; Julian Larson, Derriford Hospital; Kallinath Shyamannr, Dewsbury & District Hospital; Pauline Adiotomre, Diana Princess of Wales Hospital; Nigel Brooke, Doncaster Royal Infirmary; Phil Wylie, Dorset County Hospital; Vivien Chan, Ealing Hospital; K Aboul Khader, East Surrey Hospital; Graham Whincup, Eastbourne District General Hospital; Ruth Shephard, Epsom General Hospital; Sri Nagesh

1  
2  
3 Panasa, Fairfield general; JP Wyllie, Friarage Hospital; Abdus Mallik, Frimley Park Hospital;  
4  
5 Owen Galt, Furness General Hospital; R C de Boer, George Eliot Hospital; Jennifer  
6  
7 Holman, Gloucestershire Royal Hospital; Mike Watkinson, Good Hope Hospital; Stanley  
8  
9 Zengeya, Great Western Hospital; Morag Campbell, Guy's & St Thomas' Hospital; D Gillies,  
10  
11 Harrogate District Hospital; Andrew Butterfill, Hereford County Hospital; Michele Cruwys,  
12  
13 Hillingdon Hospital; Hilary Dixon, Hinchingsbrooke Hospital; Kate Costeloe, Homerton  
14  
15 Hospital; Eleri Adams, Horton Hospital; Chris Wood, Hull Royal Infirmary; Matthew James,  
16  
17 Ipswich Hospital; JP Wyllie, James Cook University Hospital; Vasantha Jayalal, James  
18  
19 Paget Hospital; Eleri Adams, John Radcliffe Hospital; Pratibha Rao, Kettering General  
20  
21 Hospital; B K Sharma, King George Hospital; Abhi Gkeenga, King's College Hospital; Vibert  
22  
23 Noble, King's Mill Hospital; Dwight Lindo, Kingston Hospital; Meera Lama, Lancashire  
24  
25 Women and Newborn Centre; Lawrence Miall, Leeds Neonatal Service; Andrew Currie,  
26  
27 Leicester General Hospital; Andrew Currie, Leicester Royal Infirmary; A Thirumurugan, L  
28  
29 eighton Hospital; Sudhakar Rao, Lincoln County Hospital; Andy Raffles, Lister Hospital; CW  
30  
31 Yoxall, Liverpool Women's Hospital; P Sivakumar, Luton & Dunstable Hospital; Ignatios  
32  
33 Losa, Macclesfield District General Hospital; Hamudi Kisat, Maidstone; B Jan Muhamad,  
34  
35 Manor Hospital; Aung Soe, Medway Maritime Hospital; Jasper Katumba, Milton Keynes  
36  
37 Foundation Trust Hospital; Babu Kumararatne, New Cross Hospital; Vimala Gopinathan,  
38  
39 Newham General Hospital; Mark Dyke, Norfolk & Norwich University Hospital; Yonas  
40  
41 Cherinet, North Devon District Hospital; Sri Nagesh Panasa, North Manchester General  
42  
43 Hospital; Lesley Alsford, North Middlesex University Hospital; Fiona Thompson,  
44  
45 Northampton General Hospital; Paul Mannx, Northwick Park Hospital; Stephen Wardle,  
46  
47 Nottingham City Hospital; Stephen Wardle, Nottingham University Hospital; Tim McBride,  
48  
49 Ormskirk District General Hospital; Seif Babiker, Peterborough City Hospital; Sudhakar Rao,  
50  
51 Pilgrim Hospital; Minesh Khashu, Poole Hospital NHS Foundation Trust; Than Soe, Princess  
52  
53 Alexandra Hospital; Mike Hall, Princess Anne Hospital; Philip Amess, Princess Royal  
54  
55 Hospital; Shaun Walter, Princess Royal University Hospital; Andy Raffles, Queen Elizabeth II  
56  
57 Hospital; CR Groves, Queen Alexandra Hospital; Lidia Tyszczyk, Queen Charlotte's  
58  
59  
60

1  
2  
3 Hospital; Susan Rubin, Queen Elizabeth Hospital; Shaun Walter, Queen Elizabeth Hospital;  
4  
5 Dennis Bosman, Queen Elizabeth Hospital (Gateshead); David Long, Queen Elizabeth the  
6  
7 Queen Mother Hospital; Azhar Manzoor, Queen's Hospital; B K Sharma, Queen's Hospital;  
8  
9 Amanda Ogilvy-Stuart, Rosie Maternity Hospital; Christine Harrison, Rotherham District  
10  
11 General Hospital; Vibha Sharma, Royal Albert Edward Infirmary; GJ Boson, Royal Berkshire  
12  
13 Hospital; M Yadan, Royal Bolton Hospital; Paul Munyard, Royal Cornwall Hospital; John  
14  
15 McIntyre, Royal Derby Hospital; Vaughan Lewis, Royal Devon & Exeter Hospital; D  
16  
17 Schapira, Royal Hampshire County Hospital; Owen Galt, Royal Lancaster Infirmary;  
18  
19 Natasha Maddock, Royal Oldham Hospital; Richa Gupta, Royal Preston Hospital; Alison  
20  
21 Moore, Royal Shrewsbury Hospital; Charles Godden, Royal Surrey County Hospital; Philip  
22  
23 Amess, Royal Sussex County Hospital; Steve Jones, Royal United Hospital; Alan Fenton,  
24  
25 Royal Victoria Infirmary; Anande Mohite, Russells Hall Hospital; Jonathan Moise, Salford  
26  
27 Royal; Shirley Kinsey, Salisbury District Hospital; Mazen Qunibi, Scarborough General  
28  
29 Hospital; Pauline Adiotomre, Scunthorpe General Hospital; Rob Bolton, South Tyneside  
30  
31 District Hospital; Arfa Khan, Southend Hospital; Richard Wach, Southmead Hospital; Sandra  
32  
33 Calvert, St George's Hospital; Ruth Shephard, St Helier Hospital; Anthony Emmerson, St  
34  
35 Mary's Hospital; Peter Chow, St Mary's Hospital; Sian Butterworth, St Mary's Hospital;  
36  
37 James Tooley, St Michael's Hospital; Peter Reynolds, St Peter's Hospital; Avril Garg, St  
38  
39 Richard's Hospital; KK Tewary, Staffordshire General Hospital; Carrie Heal, Stepping Hill  
40  
41 Hospital; Gail Whitehead, Stoke Mandeville Hospital; Majd Abu-Hard, Sunderland Royal  
42  
43 Hospital; Jacqueline Birch, Tameside General Hospital; Rebecca Mann, Taunton &  
44  
45 Somerset Hospital; Elizabeth Pilling, The Jessop Wing; Vivienne van Someren, The Royal  
46  
47 Free Hospital; Rainer Ebel, The Royal London Hospital; Stefan Schulee, Torbay Hospital;  
48  
49 Hamudi Kisat, Tunbridge Wells Hospital; Mark Sellwood, University College Hospital; Kate  
50  
51 Blake, University Hospital Coventry; Jauro Kuna, University Hospital Lewisham; S  
52  
53 Subramania Krish Namoorthy, University Hospital of North Durham; Kate Palmer, University  
54  
55 Hospital of North Staffordshire; Ian Verber, University Hospital of North Tees; Faisal Al-  
56  
57 Zidgali, University Hospital of South Manchester; AJ Rowlands, Victoria Hospital; Joan  
58  
59  
60

1  
2  
3 Oliver, Wansbeck General Hospital; Delyth Webb, Warrington Hospital; R B Acharya,  
4 Warwick Hospital; Chaniyil A Ramesh, Watford General Hospital; Mahfud Ben-Hamida, West  
5 Cumberland Hospital; Hashir Ariff, West Middlesex University Hospital; Ian Evans, West  
6 Suffolk Hospital; Rekha Sanghavi, Wexham Park Hospital; Caroline Sullivan, Whipps Cross  
7 University Hospital; Laweh Amegavie, Whiston Hospital; ER Broadhurd, Whittington  
8 Hospital; David Long, William Harvey Hospital; Andrew Gallagher, Worcestershire Royal  
9 Hospital; Anil Garg, Worthing Hospital; Megan Eaton, Yeovil District Hospital; Guy Millman,  
10 York District Hospital.  
11  
12  
13  
14  
15  
16  
17  
18  
19

### 20 **Contributors:**

21  
22  
23 SW conceived the study; SW, WA, and SP contributed to developing the econometric  
24 methodology for the study; SW prepared the data for analysis; SW, WA, SP, NMa, AM, ED,  
25 and NMo contributed to covariate selection and interpretation of the results; SS managed the  
26 extraction and cleaning of NNRD variables; SW prepared the first draft of the paper; this and  
27 all subsequent drafts were reviewed and revised by all authors; all authors approved the final  
28 version submitted.  
29  
30  
31  
32  
33  
34  
35

### 36 **Funding:**

37  
38  
39 The Neonatal Data Analysis Unit is supported in part by a Programme Grant for Applied  
40 Research (RP-PG-0707-10010) from the National Institute of Health Research (NIHR) and  
41 unrestricted funding from the Department of Health, Danone, [AbbVie](#), and Abbott  
42 International. SW receives funding from Bliss and the Department of Economics, University  
43 of Warwick. NMa receives part funding from the Department of Health's NIHR Biomedical  
44 Research Centre's funding scheme at UCLH/UCL. Bliss also provides funding for the  
45 NESOP group. The study funders had no role in study design, collection, analysis, and  
46 interpretation of data, writing of the report, or in the decision to submit the article for  
47 publication.  
48  
49  
50  
51  
52  
53  
54  
55  
56  
57  
58  
59  
60

**Competing interests:**

None declared.

**Ethical approval:**

This study was carried out with the National Neonatal Research Database (REC 10/H0803/151) as part of NESCOP undertaken with permission from NHS Trust Caldicott Guardian.

**Data Sharing Statement:**

No additional data available. Statistical code is available from the corresponding author.

## References

- 1 Lasswell SM, Barfield WD, Rochat RW, *et al.* Perinatal regionalization for very low-birth-weight and very preterm infants: a meta-analysis. *JAMA: the journal of the American Medical Association* 2010;**304**:992–1000.
- 2 Phibbs CS, Baker LC, Caughey AB, *et al.* Level and volume of neonatal intensive care and mortality in very-low-birth-weight infants. *The New England journal of medicine* 2007;**356**:2165–75.
- 3 Cifuentes J, Bronstein J, Phibbs CS, *et al.* Mortality in Low Birth Weight Infants According to Level of Neonatal Care at Hospital of Birth. *Pediatrics* 2002;**109**:745–51.
- 4 Chung JH, Phibbs CS, Boscardin WJ, *et al.* The effect of neonatal intensive care level and hospital volume on mortality of very low birth weight infants. *Medical care* 2010;**48**:635–44.
- 5 Rogowski J a, Horbar JD, Staiger DO, *et al.* Indirect vs direct hospital quality indicators for very low-birth-weight infants. *JAMA: the journal of the American Medical Association* 2004;**291**:202–9.
- 6 Bartels DB, Wypij D, Wenzlaff P, *et al.* Hospital volume and neonatal mortality among very low birth weight infants. *Pediatrics* 2006;**117**:2206–14.
- 7 Lorch S a, Baiocchi M, Ahlberg CE, *et al.* The differential impact of delivery hospital on the outcomes of premature infants. *Pediatrics* 2012;**130**:270–8.
- 8 Fellman V, Hellström-Westas L, Norman M, *et al.* One-year survival of extremely preterm infants after active perinatal care in Sweden. *JAMA: the journal of the American Medical Association* 2009;**301**:2225–33.
- 9 Johansson S, Montgomery SM, Ekblom A, *et al.* Preterm delivery, level of care, and infant death in sweden: a population-based study. *Pediatrics* 2004;**113**:1230–5.

- 1  
2  
3 10 Rautava L, Lehtonen L, Peltola M, *et al.* The effect of birth in secondary- or tertiary-  
4 level hospitals in Finland on mortality in very preterm infants: a birth-register study.  
5  
6 *Pediatrics* 2007;**119**:e257–63.  
7  
8  
9  
10 11 Synnes AR, Macnab YC, Qiu Z, *et al.* Neonatal intensive care unit characteristics  
11 affect the incidence of severe intraventricular hemorrhage. *Medical care*  
12  
13 2006;**44**:754–9.  
14  
15  
16 12 Phibbs CS. Managed clinical networks in neonatal care. *BMJ* 2012;**344**:e2423–e2423.  
17  
18  
19 13 Department of Health. Report of Department of Health Working Group on Neonatal  
20 Intensive Care Services. London: 2003.  
21  
22  
23 14 Gale C, Santhakumaran S, Nagarajan S, *et al.* Impact of managed clinical networks  
24 on NHS specialist neonatal services in England: population based study. *Bmj*  
25  
26 2012;**344**:e2105–e2105.  
27  
28  
29 15 Tucker J. Patient volume, staffing, and workload in relation to risk-adjusted outcomes  
30 in a random stratified sample of UK neonatal intensive care units: a prospective  
31 evaluation. *Lancet* 2002;**359**:99–107.  
32  
33  
34  
35 16 Hamilton KESC, Redshaw ME, Tarnow-Mordi W. Nurse staffing in relation to risk-  
36 adjusted mortality in neonatal care. *Archives of disease in childhood Fetal and*  
37 *neonatal edition* 2007;**92**:F99–F103.  
38  
39  
40  
41  
42 17 Van Reempts P, Gortner L, Milligan D, *et al.* Characteristics of neonatal units that  
43 care for very preterm infants in Europe: results from the MOSAIC study. *Pediatrics*  
44  
45 2007;**120**:e815–25.  
46  
47  
48  
49 [18 Department of Health. Reforming NHS financial flows: Introducing Payment by](#)  
50 [Results. London: 2002.](#)  
51  
52  
53  
54 [198](#) Ehrenkranz RA, Walsh MC, Vohr BR, *et al.* Validation of the National Institutes of  
55 Health consensus definition of bronchopulmonary dysplasia. *Pediatrics*  
56  
57 2005;**116**:1353–60.  
58  
59  
60

- 1  
2  
3 | [2049](#) Medlock S, Ravelli ACJ, Tamminga P, *et al.* Prediction of mortality in very premature  
4 | infants: a systematic review of prediction models. *PloS one* 2011;**6**:e23441.  
5  
6  
7 | [210](#) Noble M, McLennan D, Wilkinson K, *et al.* The English indices of deprivation 2007.  
8 | 2007.  
9  
10  
11 | [224](#) British Association of Perinatal Medicine. Categories of Care 2011. Categories of  
12 | Care 2011.  
13 | 2011.[http://www.bapm.org/publications/documents/guidelines/CatsofcarereportAug11.](http://www.bapm.org/publications/documents/guidelines/CatsofcarereportAug11.pdf)  
14 | pdf (accessed 12 Jun2012).  
15  
16  
17  
18  
19  
20 | [232](#) Office for National Statistics. Super Output Areas.  
21 | 2011.[http://www.ons.gov.uk/ons/guide-method/geography/beginner-s-](http://www.ons.gov.uk/ons/guide-method/geography/beginner-s-guide/census/super-output-areas--soas-/index.html)  
22 | [guide/census/super-output-areas--soas-/index.html](http://www.ons.gov.uk/ons/guide-method/geography/beginner-s-guide/census/super-output-areas--soas-/index.html) (accessed 12 Feb 2013).  
23  
24  
25  
26  
27 | [243](#) Smith LK, Draper ES, Manktelow BN, *et al.* Socioeconomic inequalities in very  
28 | preterm birth rates. *Archives of disease in childhood Fetal and neonatal edition*  
29 | 2007;**92**:F11–4.  
30  
31  
32  
33 | [254](#) Terza J V, Basu A, Rathouz PJ. Two-stage residual inclusion estimation: addressing  
34 | endogeneity in health econometric modeling. *Journal of health economics*  
35 | 2008;**27**:531–43.  
36  
37  
38  
39  
40 | [265](#) Tsai AC, Votruba M, Bridges JFP, *et al.* Overcoming bias in estimating the volume-  
41 | outcome relationship. *Health services research* 2006;**41**:252–64.  
42  
43  
44  
45 | [276](#) Imbens G, Angrist J. Identification and estimation of local average treatment effects.  
46 | *Econometrica: Journal of the Econometric Society* 1994;**62**:467–75.  
47  
48  
49 | [287](#) Heller G, Richardson DK, Schnell R, *et al.* Are we regionalized enough? Early-  
50 | neonatal deaths in low-risk births by the size of delivery units in Hesse, Germany  
51 | 1990-1999. *International journal of epidemiology* 2002;**31**:1061–8.  
52  
53  
54  
55  
56  
57  
58  
59  
60



- 1  
2  
3 | [298](#) Moster D, Lie RT, Markestad T. Relation between size of delivery unit and neonatal  
4 death in low risk deliveries: population based study. *Archives of disease in childhood*  
5 *Fetal and neonatal edition* 1999;**80**:F221–5.  
6  
7  
8  
9  
10 | [30](#) [Bowman E, Doyle LW, Murton LJ, Roy RN, Kitchen WH. Increased mortality of](#)  
11 [preterm infants transferred between tertiary perinatal centres. \*Bmj\*. Oct 29](#)  
12 [1988;\*\*297\*\*\(6656\):1098-1100.](#)  
13  
14  
15  
16 | [31](#) [Lee SK, Zupancic JA, Pendray M, et al. Transport risk index of physiologic stability: a](#)  
17 [practical system for assessing infant transport care. \*J Pediatr\*. Aug 2001;\*\*139\*\*\(2\):220-](#)  
18 [226.](#)  
19  
20  
21  
22  
23 | [3229](#) Mistry H, Dowie R, Franklin RCG, et al. Costs of neonatal care for low-birthweight  
24 babies in English hospitals. *Acta paediatrica (Oslo, Norway)*: 1992) 2009;**98**:1123–9.  
25  
26  
27  
28 | [3330](#) Gale C, Hay A, Philipp C, et al. In-utero transfer is too difficult: results from a  
29 prospective study. *Early human development* 2012;**88**:147–50.  
30  
31  
32  
33 | [34](#) [Binder S, Hill K, Meinzen-Derr J, et al. Increasing VLBW deliveries at subspecialty](#)  
34 [perinatal centers via perinatal outreach. \*Pediatrics\* 2011;\*\*127\*\*:487–93.](#)  
35  
36  
37  
38 | [35](#) [Neto MT. Perinatal care in Portugal: effects of 15 years of a regionalized system. \*Acta\*](#)  
39 [Paediatr](#) 2006;**95**:1349–52.  
40  
41  
42  
43 | [364](#) Delamothe T, Godlee F. Dr Lansley's Monster. *BMJ* 2011;**342**:d408–d408.  
44  
45  
46  
47  
48  
49  
50  
51  
52  
53  
54  
55  
56  
57  
58  
59  
60

**Table 1** Descriptive statistics for preterm infants born  $\leq 32^{+6}$  weeks gestation by neonatal unit characteristic at the hospital of birth

|                                                       | Designation of unit |                         |                      | Volume of unit <sup>a</sup> |                      |                      |
|-------------------------------------------------------|---------------------|-------------------------|----------------------|-----------------------------|----------------------|----------------------|
|                                                       | Tertiary level unit | Non-tertiary level unit | p-value <sup>b</sup> | High volume unit            | Non-high volume unit | p-value <sup>b</sup> |
| n (%)                                                 | 9,466 (46.1)        | 11,088 (54.0)           |                      | 9,541 (46.4)                | 11,013 (53.6)        |                      |
| Gestation (weeks), mean (SD)                          | 29.2 (2.5)          | 30.0 (2.1)              | <0.001               | 29.3 (2.5)                  | 29.9 (2.2)           | <0.001               |
| Birth weight (g), mean (SD)                           | 1,313.9 (438.7)     | 1,451.9 (404.5)         | <0.001               | 1326.6 (436.7)              | 1441.8 (409.4)       | <0.001               |
| Received full or partial course of antenatal steroids | 6,394 (67.6)        | 7,262 (65.5)            | 0.002                | 6,330 (66.4)                | 7,326 (66.5)         | 0.790                |
| Deprivation score bottom 10%                          | 2,020 (21.4)        | 1,342 (12.1)            | <0.001               | 1,730 (18.1)                | 1,632 (14.8)         | <0.001               |
| Male                                                  | 5,048 (53.3)        | 5,397 (53.4)            | 0.756                | 5,093 (53.4)                | 5,892 (53.5)         | 0.863                |
| Neonatal mortality                                    | 423 (4.5)           | 366 (3.3)               | <0.001               | 394 (4.1)                   | 395 (3.6)            | 0.043                |
| Any in-hospital mortality                             | 569 (6.0)           | 425 (3.8)               | <0.001               | 527 (5.5)                   | 467 (4.2)            | <0.001               |
| BPD <sup>c</sup>                                      | 3,695 (39.0)        | 2,856 (25.8)            | <0.001               | 3,548 (37.2)                | 3,003 (27.3)         | <0.001               |
| Treatment for ROP                                     | 226 (2.4)           | 107 (1.0)               | <0.001               | 195 (2.0)                   | 138 (1.3)            | <0.001               |
| Surgery for NEC                                       | 167 (1.8)           | 123 (1.1)               | <0.001               | 163 (1.7)                   | 127 (1.2)            | 0.001                |
| PMA <sup>d</sup> at discharge >40 <sup>+0</sup> weeks | 1,292 (13.7)        | 848 (7.7)               | <0.001               | 1,237 (13.0)                | 903 (8.2)            | <0.001               |

All values are n (%) unless otherwise stated.

<sup>a</sup> High volume was defined as being in the top quartile of units by number of care days provided to infants born at  $\leq 32^{+6}$  weeks gestation.

<sup>b</sup> Continuous variables were tested by t-test, categorical variables by chi-squared test.

<sup>c</sup> Bronchopulmonary dysplasia (BPD) defined as requirement of supplementary oxygen for at least 28 days post birth and at 36 weeks postmenstrual age.

<sup>d</sup> PMA at discharge = postmenstrual age at discharge, equal to gestational age at birth plus length of stay in weeks.

**Table 2** Adjusted odds ratios for outcomes associated with admission to either tertiary or high volume neonatal care at the hospital of birth using a “standard” logistic regression model

| Outcome                    | Tertiary neonatal unit  |                         | High volume neonatal unit <sup>a</sup>   |                         |                         |                                          |
|----------------------------|-------------------------|-------------------------|------------------------------------------|-------------------------|-------------------------|------------------------------------------|
|                            | (1)                     | (2)                     | (3)                                      | (4)                     | (5)                     | (6)                                      |
|                            | ≤32 <sup>+6</sup> weeks | ≤26 <sup>+6</sup> weeks | 27 <sup>+0</sup> -32 <sup>+6</sup> weeks | ≤32 <sup>+6</sup> weeks | ≤26 <sup>+6</sup> weeks | 27 <sup>+0</sup> -32 <sup>+6</sup> weeks |
| Neonatal mortality         | 0.77<br>(0.59-1.00)     | 0.65*<br>(0.46-0.91)    | 0.92<br>(0.69-1.22)                      | 0.73*<br>(0.56-0.95)    | 0.62**<br>(0.44-0.87)   | 0.86<br>(0.65-1.14)                      |
| Any in-hospital mortality  | 0.91<br>(0.72-1.15)     | 0.78<br>(0.57-1.06)     | 1.06<br>(0.83-1.36)                      | 0.83<br>(0.65-1.05)     | 0.71*<br>(0.52-0.97)    | 0.96<br>(0.75-1.24)                      |
| BPD                        | 1.23**<br>(1.07-1.40)   | 1.50**<br>(1.11-2.01)   | 1.17<br>(0.99-1.39)                      | 1.11<br>(0.97-1.28)     | 1.59**<br>(1.18-2.14)   | 1.02<br>(0.86-1.22)                      |
| Treatment for ROP          | 1.26<br>(0.91-1.75)     | 1.09<br>(0.76-1.57)     | 1.52<br>(0.91-2.55)                      | 0.95<br>(0.68-1.32)     | 0.81<br>(0.56-1.17)     | 1.22<br>(0.71-2.09)                      |
| Surgery for NEC            | 1.05<br>(0.76-1.44)     | 0.89<br>(0.58-1.36)     | 1.17<br>(0.80-1.70)                      | 1.05<br>(0.76-1.45)     | 0.94<br>(0.62-1.45)     | 1.11<br>(0.76-1.61)                      |
| PMA at discharge >40 weeks | 1.17<br>(0.97-1.41)     | 1.09<br>(0.87-1.37)     | 1.19<br>(0.97-1.47)                      | 1.13<br>(0.94-1.37)     | 1.11<br>(0.89-1.38)     | 1.11<br>(0.90-1.37)                      |

Values are odd ratios (95% confidence interval). \* p<0.05, \*\* p<0.01, \*\*\* p<0.001

BPD=Bronchopulmonary Dysplasia, PMA at discharge=postmenstrual age at discharge, equal to gestational age at birth plus the length of stay in weeks. Models are adjusted for gestational age, gestational age squared, birthweight z score, use of antenatal steroids, gender, infant year of birth and deprivation.

<sup>a</sup> High volume was defined as being in the top quartile of units by number of care days provided to infants born at ≤32<sup>+6</sup> weeks gestation.

**Table 3** Descriptive statistics for the sample of preterm infants born  $\leq 32^{+6}$  weeks gestation by designation of the neonatal unit nearest to maternal place of residence

|                                                       | Unit level designation      |                                 | Unit volume <sup>a</sup> |                                                    |                          |                              |                      |                                                    |
|-------------------------------------------------------|-----------------------------|---------------------------------|--------------------------|----------------------------------------------------|--------------------------|------------------------------|----------------------|----------------------------------------------------|
|                                                       | Nearest unit tertiary level | Nearest unit non-tertiary level | p-value <sup>b</sup>     | p-value <sup>c</sup> , controlling for deprivation | Nearest unit high volume | Nearest unit non-high volume | p-value <sup>b</sup> | p-value <sup>c</sup> , controlling for deprivation |
| n (%)                                                 | 7,167 (34.9)                | 13,387 (65.1)                   |                          |                                                    | 7,357 (35.8)             | 13,197 (64.2)                |                      |                                                    |
| Gestation (weeks), mean (SD)                          | 29.6 (2.4)                  | 29.7 (2.3)                      | 0.040                    | 0.418                                              | 29.6 (2.4)               | 29.6 (2.3)                   | 0.181                | 0.526                                              |
| Birth weight (g), mean (SD)                           | 1377.4 (429.2)              | 1394.2 (424.5)                  | 0.007                    | 0.262                                              | 1376.7 (426.7)           | 1394.8 (425.7)               | 0.004                | 0.111                                              |
| Received Full or partial course of antenatal steroids | 4,703 (65.6)                | 8,953 (66.9)                    | 0.069                    | 0.584                                              | 4,749 (64.6)             | 8,907 (67.5)                 | <0.001               | 0.052                                              |
| Deprivation score -bottom 10%                         | 1,751 (24.4)                | 1,611 (12.0)                    | <0.001                   | NA                                                 | 1,476 (20.1)             | 1,886 (14.3)                 | <0.001               | NA                                                 |
| Male                                                  | 3,820 (53.3)                | 7,165 (53.5)                    | 0.761                    | 0.854                                              | 3,958 (53.8)             | 7,027 (53.3)                 | 0.447                | 0.378                                              |
| Birth in hospital with tertiary level unit            | 4,753 (88.4)                | 2,290 (22.5)                    | <0.001                   | <0.001                                             | 3,839 (69.5)             | 3,204 (31.9)                 | <0.001               | <0.001                                             |
| Birth in hospital with high volume unit               | 3,703 (68.9)                | 3,374 (33.1)                    | <0.001                   | <0.001                                             | 4,764 (86.3)             | 2,313 (23.0)                 | <0.001               | <0.001                                             |

1  
2  
3  
4  
5  
6  
7  
8  
9  
10  
11  
12  
13  
14  
15  
16  
17  
18  
19  
20  
21  
22  
23  
24  
25  
26  
27  
28  
29  
30  
31  
32  
33  
34  
35  
36  
37  
38  
39  
40  
41  
42  
43  
44  
45  
46  
47  
48  
49

All values are n (%) and are a proportion of the column total unless otherwise stated.  
<sup>a</sup> High volume was defined as being in the top quartile of units by number of care days provided to infants born at  $\leq 32^{+6}$  weeks gestation.  
<sup>b</sup> Continuous variables were tested by t-test, categorical variables by chi-squared test.  
<sup>c</sup> P-value of F-test of coefficient on instrument from a regression of variable of interest on instrument and deprivation indicator.

For peer review only

**Table 4** Adjusted odds ratios for outcomes associated with admission to either tertiary or high volume neonatal care at the hospital of birth using an instrumental variable logistic regression model

| Outcome                                  | Tertiary neonatal unit  |                         |                                          | High volume neonatal unit <sup>a</sup> |                         |                                          |
|------------------------------------------|-------------------------|-------------------------|------------------------------------------|----------------------------------------|-------------------------|------------------------------------------|
|                                          | (1)                     | (2)                     | (3)                                      | (4)                                    | (5)                     | (6)                                      |
|                                          | ≤32 <sup>+6</sup> weeks | ≤26 <sup>+6</sup> weeks | 27 <sup>+0</sup> -32 <sup>+6</sup> weeks | ≤32 <sup>+6</sup> weeks                | ≤26 <sup>+6</sup> weeks | 27 <sup>+0</sup> -32 <sup>+6</sup> weeks |
| Neonatal Mortality                       | 0.87<br>(0.66-1.15)     | 1.01<br>(0.63-1.61)     | 0.82<br>(0.58-1.14)                      | 0.70*<br>(0.53-0.92)                   | 0.54**<br>(0.33-0.87)   | 0.80<br>(0.56-1.13)                      |
| Any in hospital mortality                | 0.85<br>(0.68-1.06)     | 0.95<br>(0.62-1.44)     | 0.84<br>(0.64-1.10)                      | 0.68**<br>(0.54-0.85)                  | 0.51**<br>(0.33-0.79)   | 0.80<br>(0.60-1.07)                      |
| BPD                                      | 1.19<br>(0.95-1.49)     | 1.04<br>(0.66-1.64)     | 1.17<br>(0.91-1.51)                      | 1.05<br>(0.85-1.29)                    | 1.78**<br>(1.12-2.81)   | 0.96<br>(0.75-1.22)                      |
| Treatment for ROP                        | 1.91*<br>(1.16-3.14)    | 1.57<br>(0.83-2.96)     | 2.17*<br>(1.06-4.47)                     | 1.02<br>(0.60-1.73)                    | 0.58<br>(0.29-1.15)     | 1.84<br>(0.83-4.05)                      |
| Surgery for NEC                          | 1.17<br>(0.72-1.90)     | 0.81<br>(0.40-1.66)     | 1.34<br>(0.76-2.38)                      | 1.26<br>(0.76-2.07)                    | 1.11<br>(0.54-2.28)     | 1.35<br>(0.75-2.43)                      |
| PMA at discharge >40 <sup>+0</sup> weeks | 0.95<br>(0.73-1.22)     | 0.83<br>(0.60-1.13)     | 0.97<br>(0.72-1.31)                      | 0.92<br>(0.72-1.17)                    | 1.04<br>(0.78-1.40)     | 0.86<br>(0.67-1.14)                      |

Values are odd ratios (95% confidence interval). \* p<0.05, \*\* p<0.01, \*\*\* p<0.001

BPD=Bronchopulmonary Dysplasia, PMA at discharge=postmenstrual age at discharge, equal to gestational age at birth plus the length of stay in weeks. Models are adjusted for gestational age, gestational age squared, birthweight z score, use of antenatal steroids, gender, infant year of birth and deprivation.

<sup>a</sup> High volume was defined as being in the top quartile of units by number of care days provided to infants born at ≤32<sup>+6</sup> weeks gestation

## Online Appendix A: Methodology

### Instrumental variables

#### Description and interpretation

The instrumental variables methodology can be readily compared to a randomised controlled trial (RCT) for estimating the effects of a particular treatment on patient clinical outcomes. In this study we explore two possible 'treatments', a high level neonatal unit at the place of birth and high volume neonatal unit at the place of birth. Our study group is composed of infants admitted to neonatal care since we do not observe infants who died prior to admission. A RCT would have allowed us to estimate the effect of the treatment by comparing the effect for the treated group with that of a control group (those infants admitted to low level or low volume neonatal units at hospitals of birth). This assumes that the outcomes of the control group replicate what would have happened to the treated group had they been in the control group. This is called the *causal effect of the treatment*; in this case defined as the difference between the outcome for an infant born in a hospital with and admitted to a high level or high volume neonatal unit and the outcome for the same infant had that infant been born in a hospital and admitted to a low level or low volume neonatal unit. The latter outcome is a counterfactual and is not observed. For every infant, only one of the outcomes is observed.

In the absence of a RCT we use an instrumental variables methodology which acts as an *ex post* randomisation. The purpose of an instrumental variable is to randomly assign infants to treatment and control groups. We assume that the mothers are taken to the nearest hospital for delivery. In order to use the characteristics of the nearest neonatal unit as instruments, we further assume that individuals in the population do not choose where they live on the basis of the level or volume of the nearest neonatal unit. This assumption needs to hold conditional on the other variables. For example, high volume units may be located in socioeconomically deprived areas where there are also a disproportionate number of very preterm infants. The instrument is valid provided we control for socioeconomic deprivation in our analyses so that the location of the mother's residence is not related to the level and volume of the nearest neonatal unit. In a RCT, the instrumental variable is the randomisation process itself.

We additionally assume that the effect of the treatment is heterogeneous since the effect of admission to a high level or high volume neonatal unit at the hospital of birth may be dependent on an infant's health.

As in the RCT setting, there are four types of individuals with respect to our treatment and instrumental variable:

*Compliers*: mothers who give birth in the nearest hospital regardless of whether it has a high level unit or not – if a mother lives near a high (low) level unit, then she gives birth in the hospital with a high (low) level unit.

*Always-takers*: mothers who always go to a hospital with a high level or high volume unit. This could be mothers who have been assessed to be better off having the baby in a high level unit and they go there regardless of the distance.

*Never-takers*: mothers who always go to a hospital with a low level or low volume unit. This could be because there is a policy that all mothers are taken to a low level unit without taking the risk into account and then infants are transferred after birth. This is unlikely and as such there are unlikely to be never-takers.

*Defiers*: women who do the opposite of compliers. There are unlikely to be mothers that fall into this group.

The only groups affected by the instrument are compliers and defiers. Since there are unlikely to be any defiers, the treatment effect estimated using an instrumental variables methodology is the effect of the treatment for compliers. This is known as the local average treatment effect (LATE).[1] There are two assumptions required for estimation of the LATE: i) that the effect of the treatment is either positive or negative for everyone, and ii) the probability of birth in a hospital with and admission to a high level or volume neonatal unit is greater the closer the mother lives to the unit. Both of these assumptions rule out defiers.

A "standard" analysis does not take into account the fact that treatment and control groups in an observational study may not be directly comparable.

#### Relationship to postnatal transfers

The previous discussion identifies how an instrumental variables methodology can be used to identify treatment effects in observational studies with a non-randomised treatment. An important part of the managed clinical network system in place in England is the provision of postnatal transfers. The question that this poses is whether postnatal transfers can be used to counteract the effect of a low volume neonatal unit at the place of birth. However, this requires identification of the effect of postnatal transfers among infants who were transferred had they not been transferred. There is not a valid control group for this. In particular, as this paper has demonstrated, the neonatal unit at the hospital of birth has an effect on the odds of mortality; the neonatal unit at the hospital of birth therefore has an effect on the probability of receiving a postnatal transfer. Hence, those infants who survive and receive a postnatal transfer will be observably and unobservably different from their counterparts not receiving a postnatal transfer.

In order to be able to identify the effect of postnatal transfers we could use an instrumental variables methodology. However, there is not a suitable candidate for an instrumental variable for postnatal transfer. A possible contender is the cot occupancy of the neonatal unit at the time of birth since this will increase the probability of transfer without affecting infant health. However, as the previous section discusses, an instrumental variables methodology identifies the treatment effect among compliers with the instrument. This group of infants is not of significant clinical interest as interest lies with those infants who may benefit from postnatal transfer to high level neonatal care regardless of the capacity of the current neonatal unit (always takers).

### Technical description

The instrumental variables methodology requires two steps. Let  $y_i$  be a binary outcome equal to one if the infant  $i$  experiences the outcome and zero otherwise,  $D_i$  is a binary indicator equal to one if the unit at the hospital of birth was either high level or high volume and zero otherwise,  $x_i$  is a vector of variables explaining infant health outcomes up to the point of birth, and  $z_i$  is the vector of instruments. In the first step we estimate:

$$Pr(D_i | x_i, z_i) = \text{logit}(\lambda + x_i' \pi + z_i' \delta) \quad (1)$$

After estimating (1), the predicted values of the treatment are calculated as

$$\widehat{D}_i = \text{logit}(\widehat{\lambda} + x_i' \widehat{\pi} + z_i' \widehat{\delta}) \quad (2)$$

where the hat indicates an estimated value. The residuals are obtained as  $\widehat{v}_i = D_i - \widehat{D}_i$ .

The second stage is then

$$Pr(y_i | x_i, D_i, \widehat{v}_i) = \text{logit}(\alpha + x_i' \beta + D_i \gamma + \widehat{v}_i \rho) \quad (3)$$

The difference between the "standard" logistic regression and the instrumental variables logistic regression is the inclusion of  $\widehat{v}_i$ .

### References for Appendix A

- [1] Imbens, G. & Angrist, J., 1994. Identification and estimation of local average treatment effects. *Econometrica: Journal of the Econometric Society*, 62(2), pp.467–475.



1  
2  
3  
4  
5  
6  
7  
8  
9  
10  
11  
12  
13  
14  
15  
16  
17  
18  
19  
20  
21  
22  
23  
24  
25  
26  
27  
28  
29  
30  
31  
32  
33  
34  
35  
36  
37  
38  
39  
40  
41  
42  
43  
44  
45  
46  
47  
48  
49

**Online Appendix B: Results from sensitivity analyses**

For peer review only

**Table B1** Adjusted odds ratios for outcomes associated with admission to either tertiary or high volume neonatal care at the hospital of birth using an instrumental variable logistic regression model; infants with missing data excluded

| Outcome                                  | Tertiary neonatal unit                     |                                           |                                                             | High volume neonatal unit <sup>a</sup>     |                                           |                                                             |
|------------------------------------------|--------------------------------------------|-------------------------------------------|-------------------------------------------------------------|--------------------------------------------|-------------------------------------------|-------------------------------------------------------------|
|                                          | (1)<br>≤32 <sup>+6</sup> weeks<br>n=19,382 | (2)<br>≤26 <sup>+6</sup> weeks<br>n=2,452 | (3)<br>27 <sup>+0</sup> -32 <sup>+6</sup> weeks<br>n=16,930 | (4)<br>≤32 <sup>+6</sup> weeks<br>n=19,382 | (5)<br>≤26 <sup>+6</sup> weeks<br>n=2,452 | (6)<br>27 <sup>+0</sup> -32 <sup>+6</sup> weeks<br>n=16,930 |
| Neonatal Mortality                       | 0.88<br>(0.67-1.17)                        | 1.03<br>(0.63-1.69)                       | 0.82<br>(0.59-1.14)                                         | 0.68**<br>(0.52-0.90)                      | 0.51**<br>(0.31-0.84)                     | 0.80<br>(0.57-1.11)                                         |
| Any in hospital mortality                | 0.85<br>(0.67-1.08)                        | 0.95<br>(0.61-1.47)                       | 0.84<br>(0.64-1.11)                                         | 0.67**<br>(0.53-0.84)                      | 0.50**<br>(0.32-0.79)                     | 0.79<br>(0.59-1.05)                                         |
| BPD                                      | 1.16<br>(0.93-1.44)                        | 1.01<br>(0.64-1.61)                       | 1.15<br>(0.90-1.46)                                         | 1.03<br>(0.84-1.26)                        | 1.86**<br>(1.17-2.97)                     | 0.94<br>(0.74-1.18)                                         |
| Treatment for ROP                        | 1.93*<br>(1.16-3.21)                       | 1.76<br>(0.91-3.77)                       | 1.94<br>(0.93-4.06)                                         | 1.04<br>(0.61-1.77)                        | 0.63<br>(0.32-1.27)                       | 1.79<br>(0.81-3.95)                                         |
| Surgery for NEC                          | 1.04<br>(0.63-1.73)                        | 0.68<br>(0.32-1.45)                       | 1.24<br>(0.68-2.24)                                         | 1.24<br>(0.73-2.09)                        | 1.02<br>(0.48-2.16)                       | 1.38<br>(0.75-2.54)                                         |
| PMA at discharge >40 <sup>+0</sup> weeks | 0.94<br>(0.73-1.22)                        | 0.84<br>(0.60-1.18)                       | 0.97<br>(0.71-1.32)                                         | 0.93<br>(0.73-1.19)                        | 1.06<br>(0.78-1.46)                       | 0.88<br>(0.66-1.16)                                         |

Values are odd ratios (95% confidence interval). \* p<0.05, \*\* p<0.01, \*\*\* p<0.001

BPD=Bronchopulmonary Dysplasia, PMA at discharge=postmenstrual age at discharge, equal to gestational age at birth plus the length of stay in weeks. Models are adjusted for gestational age, gestational age squared, birthweight z score, use of antenatal steroids, gender, infant year of birth and deprivation.

<sup>a</sup> High volume was defined as being in the top quartile of units by number of care days provided to infants born at ≤32<sup>+6</sup> weeks gestation.

1  
2  
3  
4  
5  
6  
7  
8  
9  
10  
11  
12  
13  
14  
15  
16  
17  
18  
19  
20  
21  
22  
23  
24  
25  
26  
27  
28  
29  
30  
31  
32  
33  
34  
35  
36  
37  
38  
39  
40  
41  
42  
43  
44  
45  
46  
47  
48  
49

**Table B2** Adjusted odds ratios for morbidities associated with admission to either tertiary or high volume neonatal care at the hospital of birth using an instrumental variable logistic regression model; infants who died excluded from morbidity outcome

| Outcome                              | Tertiary neonatal unit                     |                                           |                                                             | High volume neonatal unit <sup>a</sup>     |                                           |                                                             |
|--------------------------------------|--------------------------------------------|-------------------------------------------|-------------------------------------------------------------|--------------------------------------------|-------------------------------------------|-------------------------------------------------------------|
|                                      | (1)<br>≤32 <sup>+6</sup> weeks<br>n=19,560 | (2)<br>≤26 <sup>+6</sup> weeks<br>n=1,987 | (3)<br>27 <sup>+0</sup> -32 <sup>+6</sup> weeks<br>n=17,573 | (4)<br>≤32 <sup>+6</sup> weeks<br>n=19,560 | (5)<br>≤26 <sup>+6</sup> weeks<br>n=1,987 | (6)<br>27 <sup>+0</sup> -32 <sup>+6</sup> weeks<br>n=17,573 |
| BPD                                  | 1.15<br>(0.88-1.52)                        | 1.07<br>(0.30-3.80)                       | 1.16<br>(0.88-1.52)                                         | 0.93<br>(0.72-1.22)                        | 0.88<br>(0.25-3.04)                       | 0.94<br>(0.72-1.22)                                         |
| Treatment for ROP                    | 1.96*<br>(1.15-3.32)                       | 1.73<br>(0.87-3.45)                       | 2.13*<br>(1.04-4.40)                                        | 0.93<br>(0.53-1.65)                        | 0.49<br>(0.23-1.03)                       | 1.80<br>(0.81-3.99)                                         |
| Surgery for NEC                      | 1.12<br>(0.66-1.90)                        | 0.80<br>(0.36-1.76)                       | 1.29<br>(0.71-2.33)                                         | 1.11<br>(0.65-1.89)                        | 0.82<br>(0.37-1.82)                       | 1.29<br>(0.70-2.38)                                         |
| PMA >40 <sup>+0</sup> weeks          | 0.89<br>(0.67-1.19)                        | 0.78<br>(0.53-1.15)                       | 0.94<br>(0.69-1.28)                                         | 0.83<br>(0.63-1.08)                        | 0.78<br>(0.53-1.13)                       | 0.85<br>(0.63-1.13)                                         |
| Any in-hospital mortality and/or BPD | 1.13<br>(0.88-1.45)                        | N/A <sup>b</sup>                          | 1.13<br>(0.88-1.45)                                         | 0.92<br>(0.72-1.17)                        | 0.83<br>(0.24-2.86)                       | 0.92<br>(0.72-1.17)                                         |

Values are odd ratios (95% confidence interval). \* p<0.05, \*\* p<0.01, \*\*\* p<0.001

BPD=Bronchopulmonary Dysplasia, PMA at discharge=postmenstrual age at discharge, equal to gestational age at birth plus the length of stay in weeks. Models are adjusted for gestational age, gestational age squared, birthweight z score, use of antenatal steroids, gender, infant year of birth and deprivation.

<sup>a</sup> High volume was defined as being in the top quartile of units by number of care days provided to infants born at ≤32<sup>+6</sup> weeks gestation.

<sup>b</sup> Unable to estimate due to too few negative outcomes

**Table B3** Adjusted odds ratios for outcomes associated with admission to high volume neonatal care at the hospital of birth using an instrumental variable logistic regression model; alternative definitions of 'high volume'

| Outcome                   | High volume defined as top 25% by number of intensive care days provided to infants $\leq 32^{+6}$ weeks |                             |                                | High volume defined as top 25% by number of $\leq 32^{+6}$ weeks births in hospital |                             |                                |
|---------------------------|----------------------------------------------------------------------------------------------------------|-----------------------------|--------------------------------|-------------------------------------------------------------------------------------|-----------------------------|--------------------------------|
|                           | (1)<br>$\leq 32^{+6}$ weeks                                                                              | (2)<br>$\leq 26^{+6}$ weeks | (3)<br>$27^{+0}-32^{+6}$ weeks | (4)<br>$\leq 32^{+6}$ weeks                                                         | (5)<br>$\leq 26^{+6}$ weeks | (6)<br>$27^{+0}-32^{+6}$ weeks |
| Neonatal Mortality        | 0.73*<br>(0.56-0.96)                                                                                     | 0.73<br>(0.45-1.19)         | 0.71*<br>(0.52-0.98)           | 0.81<br>(0.61-1.06)                                                                 | 0.78<br>(0.49-1.24)         | 0.82<br>(0.59-1.13)            |
| Any in hospital mortality | 0.67**<br>(0.53-0.86)                                                                                    | 0.65*<br>(0.43-1.00)        | 0.69*<br>(0.50-0.94)           | 0.75*<br>(0.59-0.94)                                                                | 0.69<br>(0.45-1.07)         | 0.79<br>(0.60-1.05)            |
| BPD                       | 0.98<br>(0.79-1.23)                                                                                      | 1.28<br>(0.81-2.02)         | 0.93<br>(0.72-1.19)            | 1.09<br>(0.88-1.35)                                                                 | 1.41<br>(0.91-2.17)         | 1.02<br>(0.79-1.32)            |
| Surgery for ROP           | 0.96<br>(0.56-1.57)                                                                                      | 0.55<br>(0.28-1.06)         | 1.50<br>(0.66-3.43)            | 1.27<br>(0.76-2.13)                                                                 | 0.71<br>(0.36-1.42)         | 1.19<br>(0.88-4.14)            |
| Surgery for NEC           | 1.16<br>(0.73-1.86)                                                                                      | 1.11<br>(0.54-2.28)         | 1.22<br>(0.69-2.17)            | 1.10<br>(0.67-1.81)                                                                 | 0.95<br>(0.48-1.89)         | 1.15<br>(0.63-2.13)            |
| PMA $>40^{+0}$ weeks      | 0.81<br>(0.63-1.04)                                                                                      | 0.87<br>(0.65-1.17)         | 0.78<br>(0.58-1.04)            | 0.86<br>(0.67-1.10)                                                                 | 0.88<br>(0.64-1.21)         | 0.83<br>(0.62-1.10)            |

Values are odd ratios (95% confidence interval). \*  $p < 0.05$ , \*\*  $p < 0.01$ , \*\*\*  $p < 0.001$

BPD=Bronchopulmonary Dysplasia, PMA at discharge=postmenstrual age at discharge, equal to gestational age at birth plus the length of stay in weeks. Models are adjusted for gestational age, gestational age squared, birthweight z score, use of antenatal steroids, gender, infant year of birth and deprivation.

1  
2  
3  
4  
5  
6  
7  
8  
9  
10  
11  
12  
13  
14  
15  
16  
17  
18  
19  
20  
21  
22  
23  
24  
25  
26  
27  
28  
29  
30  
31  
32  
33  
34  
35  
36  
37  
38  
39  
40  
41  
42  
43  
44  
45  
46  
47  
48  
49

**Table B3** Adjusted odds ratios for outcomes associated with admission to high volume neonatal care at the hospital of birth using an instrumental variable logistic regression model; alternative definitions of 'high volume'

**High volume defined as top 25% by number of intensive care days provided to infants  $\leq 32^{+6}$  weeks**

| <b>Outcome</b>            | <b>(1)<br/><math>\leq 32^{+6}</math> weeks</b> | <b>(2)<br/><math>\leq 26^{+6}</math> weeks</b> | <b>(3)<br/><math>27^{+0}-32^{+6}</math> weeks</b> |
|---------------------------|------------------------------------------------|------------------------------------------------|---------------------------------------------------|
| Neonatal Mortality        | 0.40<br>(0.03-4.96)                            | N/A <sup>a</sup>                               | 0.74<br>(0.01-36.67)                              |
| Any in hospital mortality | 0.28<br>(0.04-2.28)                            | 1.18<br>(0.13-10.69)                           | 0.52<br>(0.03-9.44)                               |
| BPD                       | 1.95<br>(0.48-7.84)                            | 0.29<br>(0.04-2.35)                            | 1.10<br>(0.16-7.79)                               |
| Surgery for ROP           | 2.23<br>(0.17-29.70)                           | 1.64<br>(0.07-40.08)                           | N/A <sup>a</sup>                                  |
| Surgery for NEC           | 4.11<br>(0.29-58.79)                           | 0.23<br>(0.00-26.25)                           | N/A <sup>a</sup>                                  |
| PMA $>40^{+0}$ weeks      | 0.54<br>(0.11-2.64)                            | 0.40<br>(0.06-2.50)                            | 0.45<br>(0.05-3.95)                               |

Values are odd ratios (95% confidence interval). \* p<0.05, \*\* p<0.01, \*\*\* p<0.001

BPD=Bronchopulmonary Dysplasia, PMA at discharge=postmenstrual age at discharge, equal to gestational age at birth plus the length of stay in weeks. Models are adjusted for gestational age, gestational age squared, birthweight z score, use of antenatal steroids, gender, infant year of birth and deprivation.

<sup>a</sup>Too few observed outcomes in treatment group to estimate

STROBE Statement—Checklist of items that should be included in reports of *cohort studies*

|                           | Item No | Recommendation                                                                                                                                                   |
|---------------------------|---------|------------------------------------------------------------------------------------------------------------------------------------------------------------------|
| <b>Title and abstract</b> | 1       | (a) Indicate the study's design with a commonly used term in the title or the abstract<br><br><b>pages 1,4,5</b>                                                 |
|                           |         | (b) Provide in the abstract an informative and balanced summary of what was done and what was found<br><br><b>pages 4,5</b>                                      |
| <b>Introduction</b>       |         |                                                                                                                                                                  |
| Background/rationale      | 2       | Explain the scientific background and rationale for the investigation being reported<br><br><b>Pages 6,7</b>                                                     |
| Objectives                | 3       | State specific objectives, including any prespecified hypotheses<br><br><b>Pages 6,7</b>                                                                         |
| <b>Methods</b>            |         |                                                                                                                                                                  |
| Study design              | 4       | Present key elements of study design early in the paper<br><br><b>Pages 9-13</b>                                                                                 |
| Setting                   | 5       | Describe the setting, locations, and relevant dates, including periods of recruitment, exposure, follow-up, and data collection<br><br><b>Pages 7-9</b>          |
| Participants              | 6       | (a) Give the eligibility criteria, and the sources and methods of selection of participants. Describe methods of follow-up<br><br><b>Pages 7-9, 12-13</b>        |
|                           |         | (b) For matched studies, give matching criteria and number of exposed and unexposed<br><br><i>N/A not a matched study</i>                                        |
| Variables                 | 7       | Clearly define all outcomes, exposures, predictors, potential confounders, and effect modifiers. Give diagnostic criteria, if applicable<br><br><b>Pages 8,9</b> |
| Data sources/             | 8*      | For each variable of interest, give sources of data and details of methods of assessment (measurement). Describe comparability of assessment methods if there is |

1

1

|    |                        |     |                                                                                                                                                                                                   |
|----|------------------------|-----|---------------------------------------------------------------------------------------------------------------------------------------------------------------------------------------------------|
| 1  | measurement            |     | more than one group                                                                                                                                                                               |
| 2  |                        |     |                                                                                                                                                                                                   |
| 3  |                        |     | <b>Pages 8,9</b>                                                                                                                                                                                  |
| 4  |                        |     |                                                                                                                                                                                                   |
| 5  | Bias                   | 9   | Describe any efforts to address potential sources of bias                                                                                                                                         |
| 6  |                        |     |                                                                                                                                                                                                   |
| 7  |                        |     | <b>Pages 9-13</b>                                                                                                                                                                                 |
| 8  |                        |     |                                                                                                                                                                                                   |
| 9  | Study size             | 10  | Explain how the study size was arrived at                                                                                                                                                         |
| 10 |                        |     |                                                                                                                                                                                                   |
| 11 |                        |     | <b>Used whole eligible population (n=20,554)</b>                                                                                                                                                  |
| 12 |                        |     |                                                                                                                                                                                                   |
| 13 | Quantitative variables | 11  | Explain how quantitative variables were handled in the analyses. If applicable, describe which groupings were chosen and why                                                                      |
| 14 |                        |     |                                                                                                                                                                                                   |
| 15 |                        |     | <b>Pages 7-13</b>                                                                                                                                                                                 |
| 16 |                        |     |                                                                                                                                                                                                   |
| 17 |                        |     |                                                                                                                                                                                                   |
| 18 | Statistical methods    | 12  | (a) Describe all statistical methods, including those used to control for confounding                                                                                                             |
| 19 |                        |     |                                                                                                                                                                                                   |
| 20 |                        |     | <b>Pages 9-13</b>                                                                                                                                                                                 |
| 21 |                        |     |                                                                                                                                                                                                   |
| 22 |                        |     | (b) Describe any methods used to examine subgroups and interactions                                                                                                                               |
| 23 |                        |     |                                                                                                                                                                                                   |
| 24 |                        |     | <b>Pages 12-13</b>                                                                                                                                                                                |
| 25 |                        |     |                                                                                                                                                                                                   |
| 26 |                        |     | (c) Explain how missing data were addressed                                                                                                                                                       |
| 27 |                        |     |                                                                                                                                                                                                   |
| 28 |                        |     | <b>Pages 12-13</b>                                                                                                                                                                                |
| 29 |                        |     |                                                                                                                                                                                                   |
| 30 |                        |     | (d) If applicable, explain how loss to follow-up was addressed                                                                                                                                    |
| 31 |                        |     |                                                                                                                                                                                                   |
| 32 |                        |     | N/A Cross-sectional study                                                                                                                                                                         |
| 33 |                        |     |                                                                                                                                                                                                   |
| 34 |                        |     | (e) Describe any sensitivity analyses                                                                                                                                                             |
| 35 |                        |     |                                                                                                                                                                                                   |
| 36 |                        |     | <b>Pages 12-13</b>                                                                                                                                                                                |
| 37 |                        |     |                                                                                                                                                                                                   |
| 38 |                        |     |                                                                                                                                                                                                   |
| 39 | <b>Results</b>         |     |                                                                                                                                                                                                   |
| 40 |                        |     |                                                                                                                                                                                                   |
| 41 | Participants           | 13* | (a) Report numbers of individuals at each stage of study—eg numbers potentially eligible, examined for eligibility, confirmed eligible, included in the study, completing follow-up, and analysed |
| 42 |                        |     |                                                                                                                                                                                                   |
| 43 |                        |     |                                                                                                                                                                                                   |
| 44 |                        |     |                                                                                                                                                                                                   |
| 45 |                        |     | <b>Pages 13-17</b>                                                                                                                                                                                |
| 46 |                        |     |                                                                                                                                                                                                   |
| 47 |                        |     | (b) Give reasons for non-participation at each stage                                                                                                                                              |
| 48 |                        |     |                                                                                                                                                                                                   |
| 49 |                        |     | <b>Pages 16-17</b>                                                                                                                                                                                |
| 50 |                        |     |                                                                                                                                                                                                   |
| 51 |                        |     | (c) Consider use of a flow diagram                                                                                                                                                                |
| 52 |                        |     |                                                                                                                                                                                                   |
| 53 |                        |     | <b>There were no non-participants, missing data are addressed in text and</b>                                                                                                                     |
| 54 |                        |     |                                                                                                                                                                                                   |
| 55 |                        |     |                                                                                                                                                                                                   |
| 56 | 2                      |     |                                                                                                                                                                                                   |
| 57 |                        |     |                                                                                                                                                                                                   |
| 58 | 2                      |     |                                                                                                                                                                                                   |
| 59 |                        |     |                                                                                                                                                                                                   |
| 60 |                        |     |                                                                                                                                                                                                   |

| <b>methods</b>    |     |                                                                                                                                                                                                                                                       |
|-------------------|-----|-------------------------------------------------------------------------------------------------------------------------------------------------------------------------------------------------------------------------------------------------------|
| Descriptive data  | 14* | (a) Give characteristics of study participants (eg demographic, clinical, social) and information on exposures and potential confounders<br><br><b>Pages 13-15, table 1</b>                                                                           |
|                   |     | (b) Indicate number of participants with missing data for each variable of interest<br><br><b>Pages 16-17</b>                                                                                                                                         |
|                   |     | (c) Summarise follow-up time (eg, average and total amount)<br><br>N/A                                                                                                                                                                                |
| Outcome data      | 15* | Report numbers of outcome events or summary measures over time<br><br><b>Pages 13-15, table 1</b>                                                                                                                                                     |
| Main results      | 16  | (a) Give unadjusted estimates and, if applicable, confounder-adjusted estimates and their precision (eg, 95% confidence interval). Make clear which confounders were adjusted for and why they were included<br><br><b>Pages 9, 13-16, tables 1-4</b> |
|                   |     | (b) Report category boundaries when continuous variables were categorized<br><br>N/A                                                                                                                                                                  |
|                   |     | (c) If relevant, consider translating estimates of relative risk into absolute risk for a meaningful time period<br><br>N/A                                                                                                                           |
| Other analyses    | 17  | Report other analyses done—eg analyses of subgroups and interactions, and sensitivity analyses<br><br><b>Pages 13-17, tables 2,4, appendix B</b>                                                                                                      |
| <b>Discussion</b> |     |                                                                                                                                                                                                                                                       |
| Key results       | 18  | Summarise key results with reference to study objectives<br><br><b>Pages 17-22</b>                                                                                                                                                                    |
| Limitations       | 19  | Discuss limitations of the study, taking into account sources of potential bias or imprecision. Discuss both direction and magnitude of any potential bias<br><br><b>Pages 19-22</b>                                                                  |
| Interpretation    | 20  | Give a cautious overall interpretation of results considering objectives, limitations,                                                                                                                                                                |

3

3



---

1 multiplicity of analyses, results from similar studies, and other relevant evidence

2  
3 **Pages 17-22**

---

4  
5 Generalisability 21 Discuss the generalisability (external validity) of the study results

6  
7 **Pages 17-22**

---

8  
9 **Other information**

---

10  
11 Funding 22 Give the source of funding and the role of the funders for the present study and, if  
12 applicable, for the original study on which the present article is based

13  
14  
15 **N/A no specific funding**

---

16  
17  
18 \*Give information separately for exposed and unexposed groups.

19  
20  
21  
22  
23 **Note:** An Explanation and Elaboration article discusses each checklist item and gives methodological background and  
24 published examples of transparent reporting. The STROBE checklist is best used in conjunction with this article (freely  
25 available on the Web sites of PLoS Medicine at <http://www.plosmedicine.org/>, Annals of Internal Medicine at  
26 <http://www.annals.org/>, and Epidemiology at <http://www.epidem.com/>). Information on the STROBE Initiative is  
27 available at <http://www.strobe-statement.org>.

28  
29  
30  
31  
32  
33  
34  
35  
36  
37  
38  
39  
40  
41  
42  
43  
44  
45  
46  
47  
48  
49  
50  
51  
52  
53  
54  
55  
56 4

57  
58 4
